# Supplementary material
Source: publisher figshare collection journal article supplement (https://acs.figshare.com/ndownloader/files/22164084)
Supplement: Supplementary file 1 [file 22164084]

# Copolymerization of Nonpolar Olefins and Allyl Acetate Using a Nickel Catalyst Bearing a Methylene-bridged Bisphosphine Monoxide Ligand

*Jin Jung, Hina Yasuda, and Kyoko Nozaki\**

Department of Chemistry and Biotechnology, Graduate School of Engineering, The University of Tokyo, 7-3-1 Hongo, Bunkyo-ku, Tokyo 113-8656, Japan

## Table of Content

- 1. Experimental Section**
- 2. NMR Spectra**
- 3. SEC Traces**
- 4. DSC Traces**
- 5. X-ray Crystallographic Data of Complex 3**
- 6. References**

# 1. Experimental Section

## Copolymerization of propylene with allyl acetate by *in-situ* generated palladium complex (Table S1).

Designated amount of ligand **1b**, anhydrous dichloromethane (1.0 mL), and (cod)PdMeCl (1.0 equiv.) were added into a 20 mL Schlenk under inert atmosphere, and then the reaction mixture was stirred for overnight at room temperature. Subsequently, the reaction mixture was injected *via* syringe into the 50 mL autoclave charged with NaBAr<sup>F</sup><sub>4</sub> (1.0 equiv.), designated amount of propylene, allyl acetate, and anhydrous toluene. After the autoclave was sealed, the reaction mixture was stirred in an isothermal heating block under designated condition. After cooling to room temperature and venting residual propylene, the volatile matters of reaction mixture were removed under reduced pressure. The product was then dried under vacuum for 6 h at 100 °C to afford a copolymer. The molecular weight and polydispersity were determined by SEC. The contents of polar functional groups were determined by <sup>1</sup>H NMR spectra (Figures S32 and S33).

**Table S1. Copolymerization with allyl acetate using *in-situ* generated Pd catalyst.**

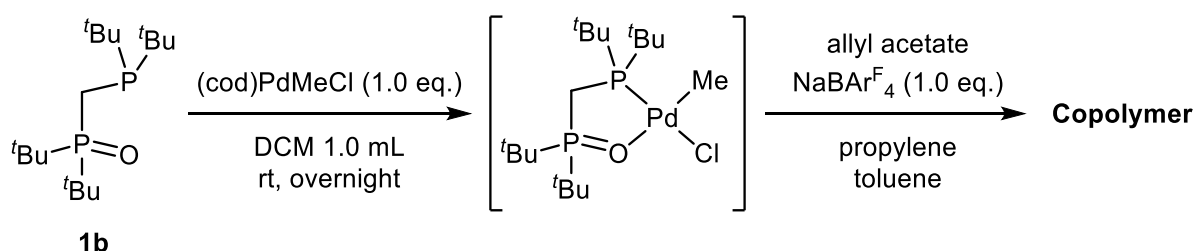

| entry | propylene (g) | <b>1b</b> (mmol) | allyl acetate (mL) | temp. (°C) | time (h) | yield (g) | activity (g/mmol·h) | <i>M</i> <sub>n</sub> (g/mol) <sup>a</sup> | <i>M</i> <sub>w</sub> / <i>M</i> <sub>n</sub> <sup>a</sup> | FG content (mol%) <sup>b</sup> |
|-------|---------------|------------------|--------------------|------------|----------|-----------|---------------------|--------------------------------------------|------------------------------------------------------------|--------------------------------|
| 1     | 6.4           | 0.020            | 1.0                | 50         | 12       | 0.053     | 0.22                | 870                                        | 1.5                                                        | 0.25                           |
| 2     | 9.3           | 0.010            | 0.1                | 100        | 6        | 0.026     | 0.43                | 740                                        | 1.4                                                        | 0.16                           |

cod = 1,5-cyclooctadiene, Ar<sup>F</sup> = 3,5-(CF<sub>3</sub>)<sub>2</sub>C<sub>6</sub>H<sub>3</sub>. <sup>a</sup> Determined by size-exclusion chromatography using polystyrene standards and corrected by universal calibration. <sup>b</sup> Determined by <sup>1</sup>H NMR analysis.

## Complexation trial of phenylnickel chloride complex **2b**

Ligand **1b** (50.0 mg, 0.156 mmol), Ni(cod)<sub>2</sub> (42.9 mg, 0.156 mmol), and anhydrous chlorobenzene (1.0 mL) were added into a 20 mL Schlenk under inert atmosphere, and then the reaction mixture was stirred for 14 h at room temperature. The color of reaction mixture changed from yellow to orange. Subsequently, the reaction mixture was concentrated under reduced pressure, and then *n*-hexane was added to afford an orange precipitate, but it rapidly decomposed during separation to black-brown solid.

### Complexation trial of cationic phenylnickel complex

Ligand **1b** (25.0 mg, 78.0  $\mu\text{mol}$ ),  $\text{Ni}(\text{cod})_2$  (21.5 mg, 78.2  $\mu\text{mol}$ ), and anhydrous chlorobenzene (1.0 mL) were added into a 10 mL J. Young sample flask under inert atmosphere, and then the reaction mixture was stirred for 14 h at room temperature. The color of reaction mixture changed from yellow to orange. Subsequently, to the reaction mixture was added  $\text{NaBAr}^{\text{F}}_4$  (69.1 mg, 78.0  $\mu\text{mol}$ ) and 2,6-lutidine (12.6 mg, 117  $\mu\text{mol}$ ). After stirring for 3 h at room temperature, *n*-hexane was added to the reaction mixture to afford a sticky solid which exhibited a complicated  $^1\text{H}$  NMR spectrum and no polymerization activity.

### Homopolymerization trial of allyl acetate by *in-situ* generated nickel $\eta^3$ -allyl complex and MMAO.

Ligand **1b** (9.6 mg, 0.030 mmol),  $\text{NaBAr}^{\text{F}}_4$  (28 mg, 0.030 mmol),  $[\text{Ni}(\eta^3\text{-allyl})\text{Br}]_2$  (5.4 mg, 0.015 mmol), and anhydrous dichloromethane (3.0 mL) were added into a 20 mL Schlenk under inert atmosphere, and then the reaction mixture was stirred for overnight at room temperature. Subsequently, the yellow suspension including sodium bromide salt was injected *via* syringe into the mixture of AAc (5.0 mL), MMAO (4.6 mL,  $\text{Al/Ni} = 500$ ), and anhydrous toluene (3.4 mL). The reaction mixture was stirred for 47 h at 50  $^\circ\text{C}$ , then poured into MeOH (300 mL). Trace amount of precipitated was obtained by filter, but it was not determined as poly(AAc).

## 2. NMR Spectra

### NMR spectra of complex 3

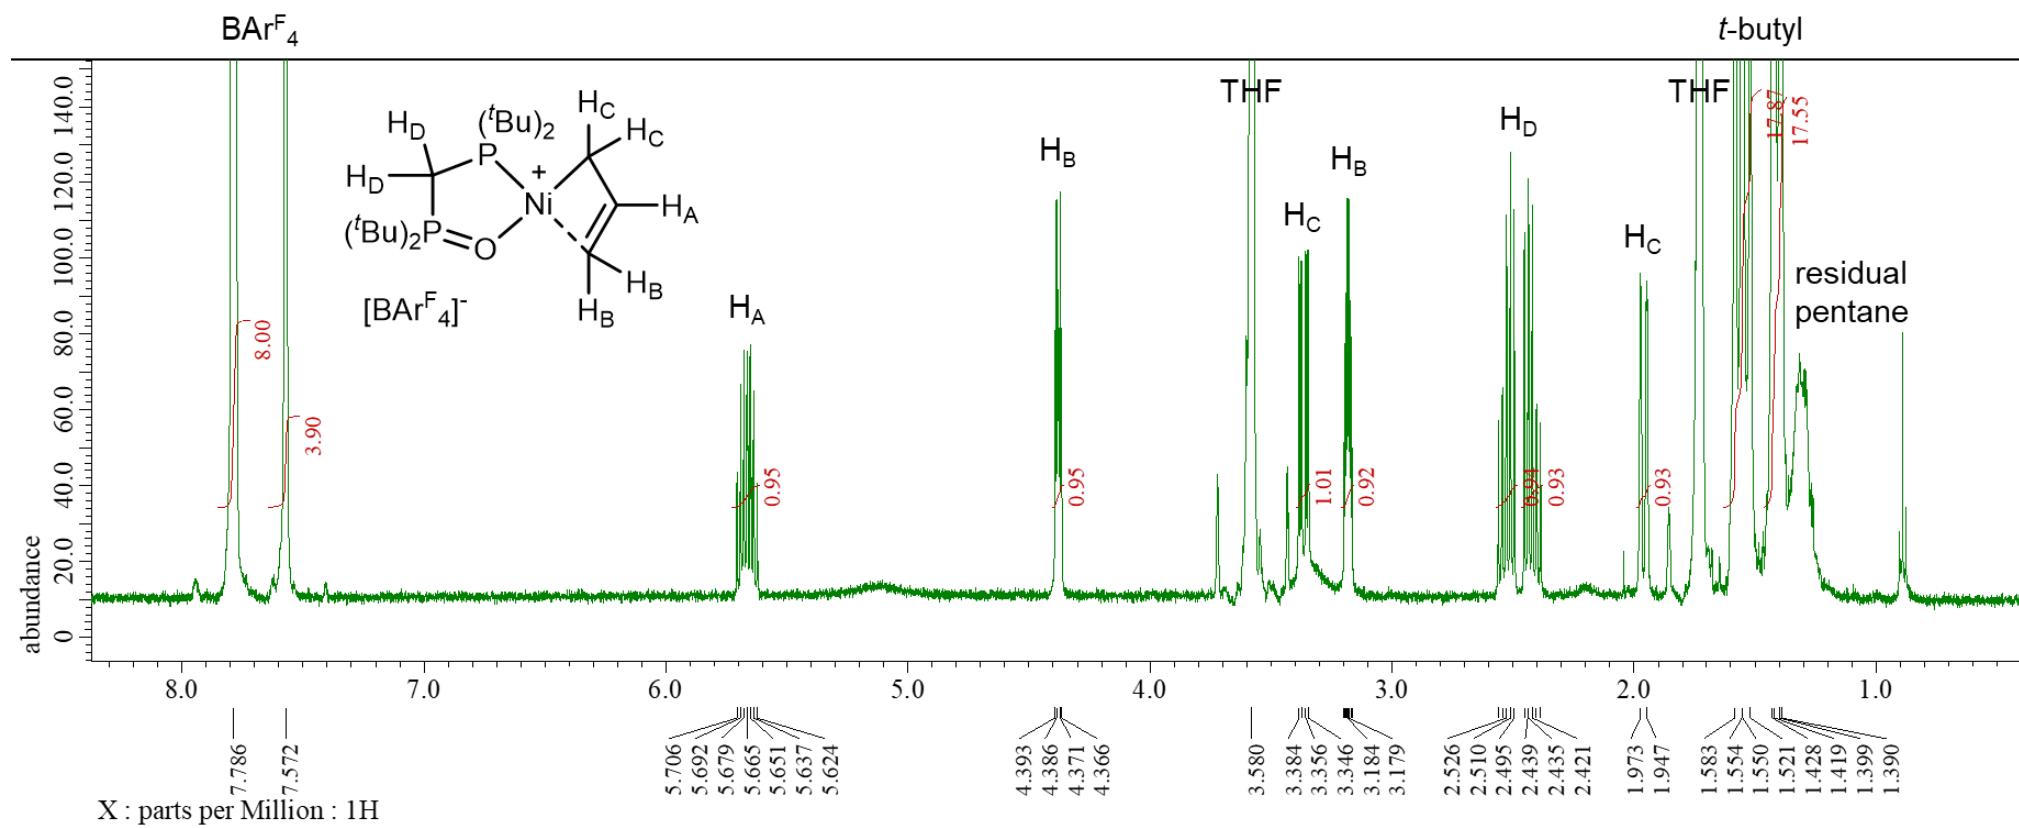

**Figure S1.**  $^1\text{H}$  NMR spectrum of the complex **3** ( $\text{THF-}d_8$ , rt). Peak assignments were based on the previously reported palladium BPMO complex **VII**,<sup>1</sup> palladium BPMO complex **VI**,<sup>2</sup> and  $^1\text{H}$ - $^1\text{H}$  COSY NMR analysis.

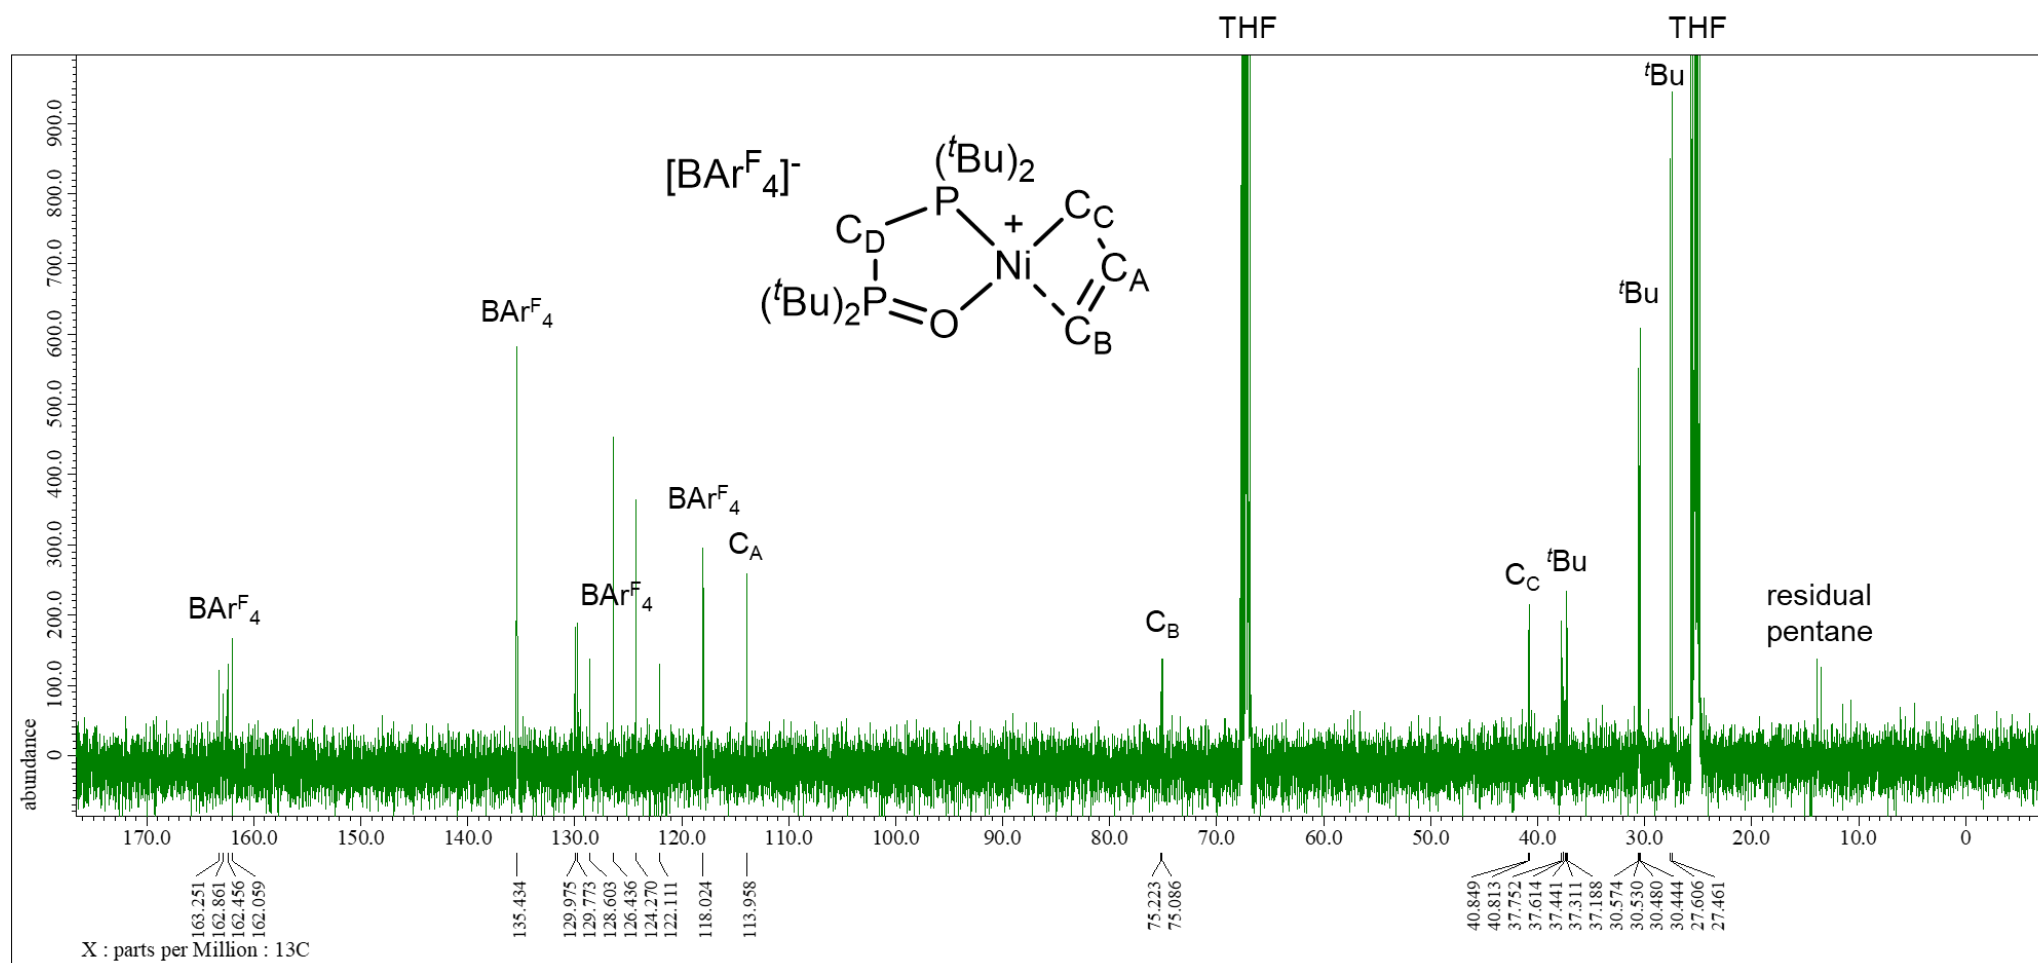

**Figure S2.**  $^{13}\text{C}\{^1\text{H}\}$  NMR spectrum of the complex **3** ( $\text{THF-}d_8$ , rt). Peak assignments were based on the previously reported palladium BPMO complex **VII**<sup>1</sup> and palladium BPMO complex **VI**.<sup>2</sup>

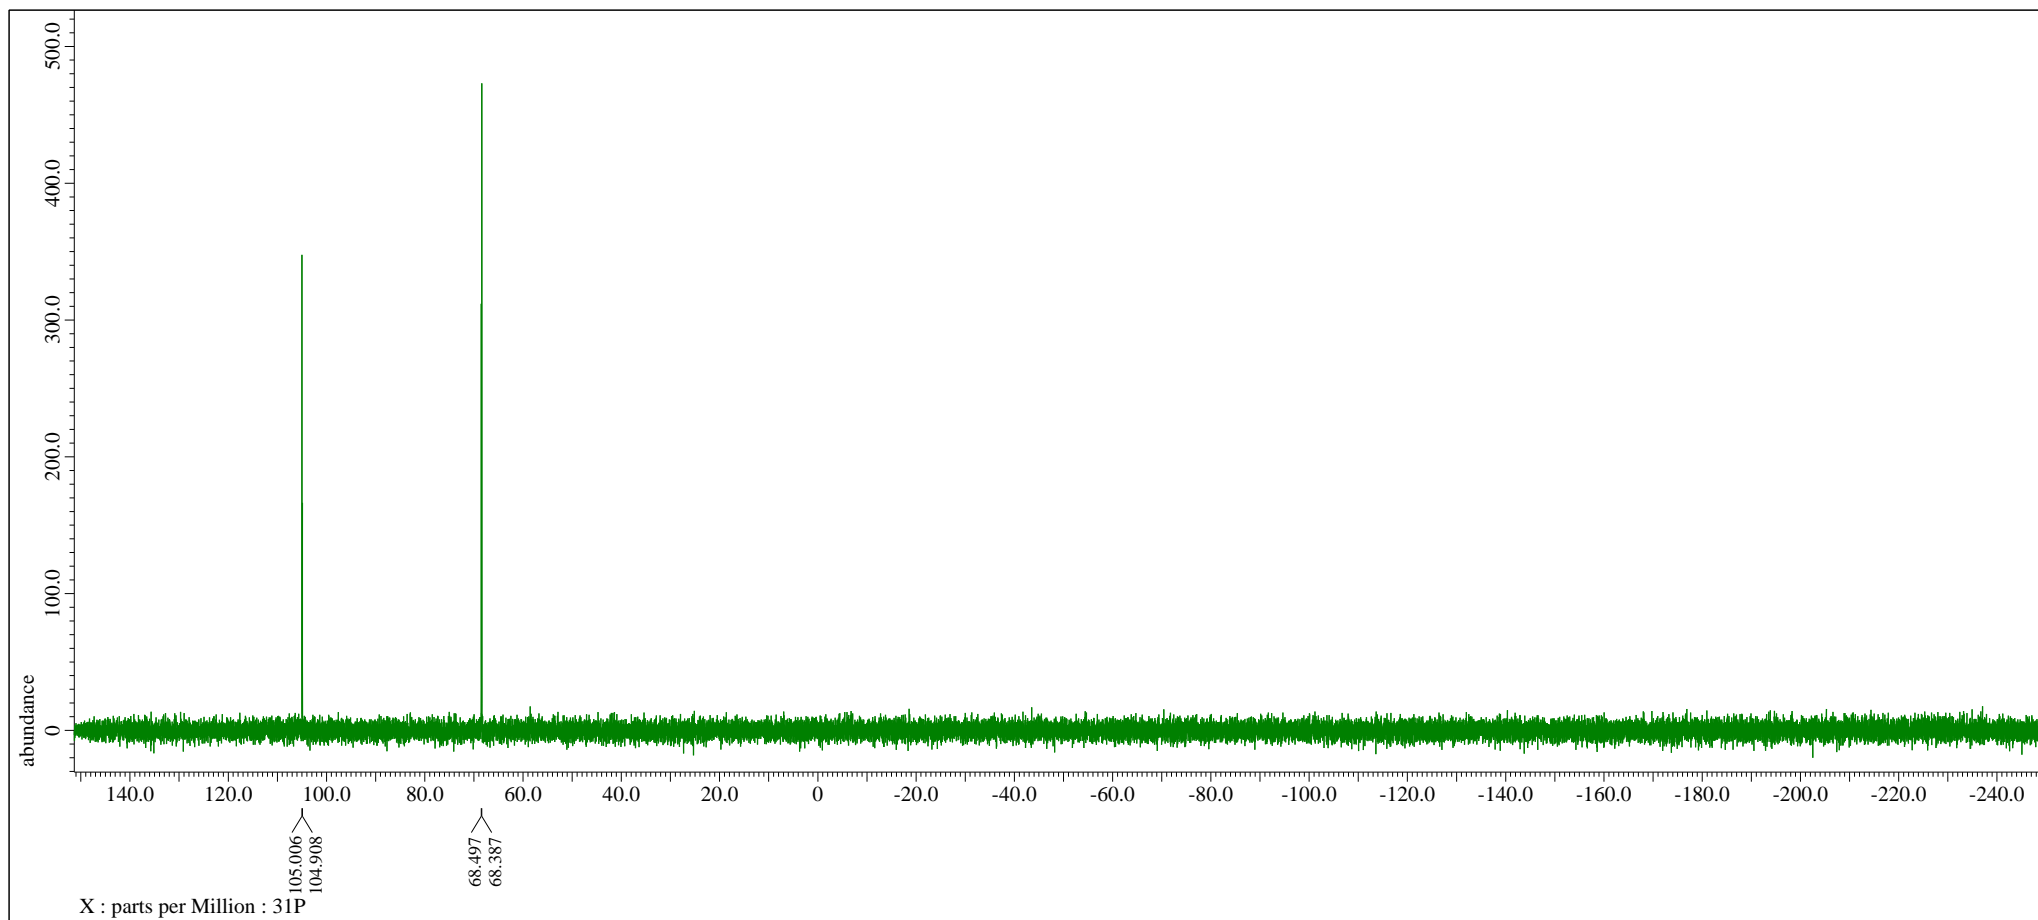

**Figure S3.**  $^{31}\text{P}\{^1\text{H}\}$  NMR spectrum of the complex **3** (THF- $d_8$ , rt).

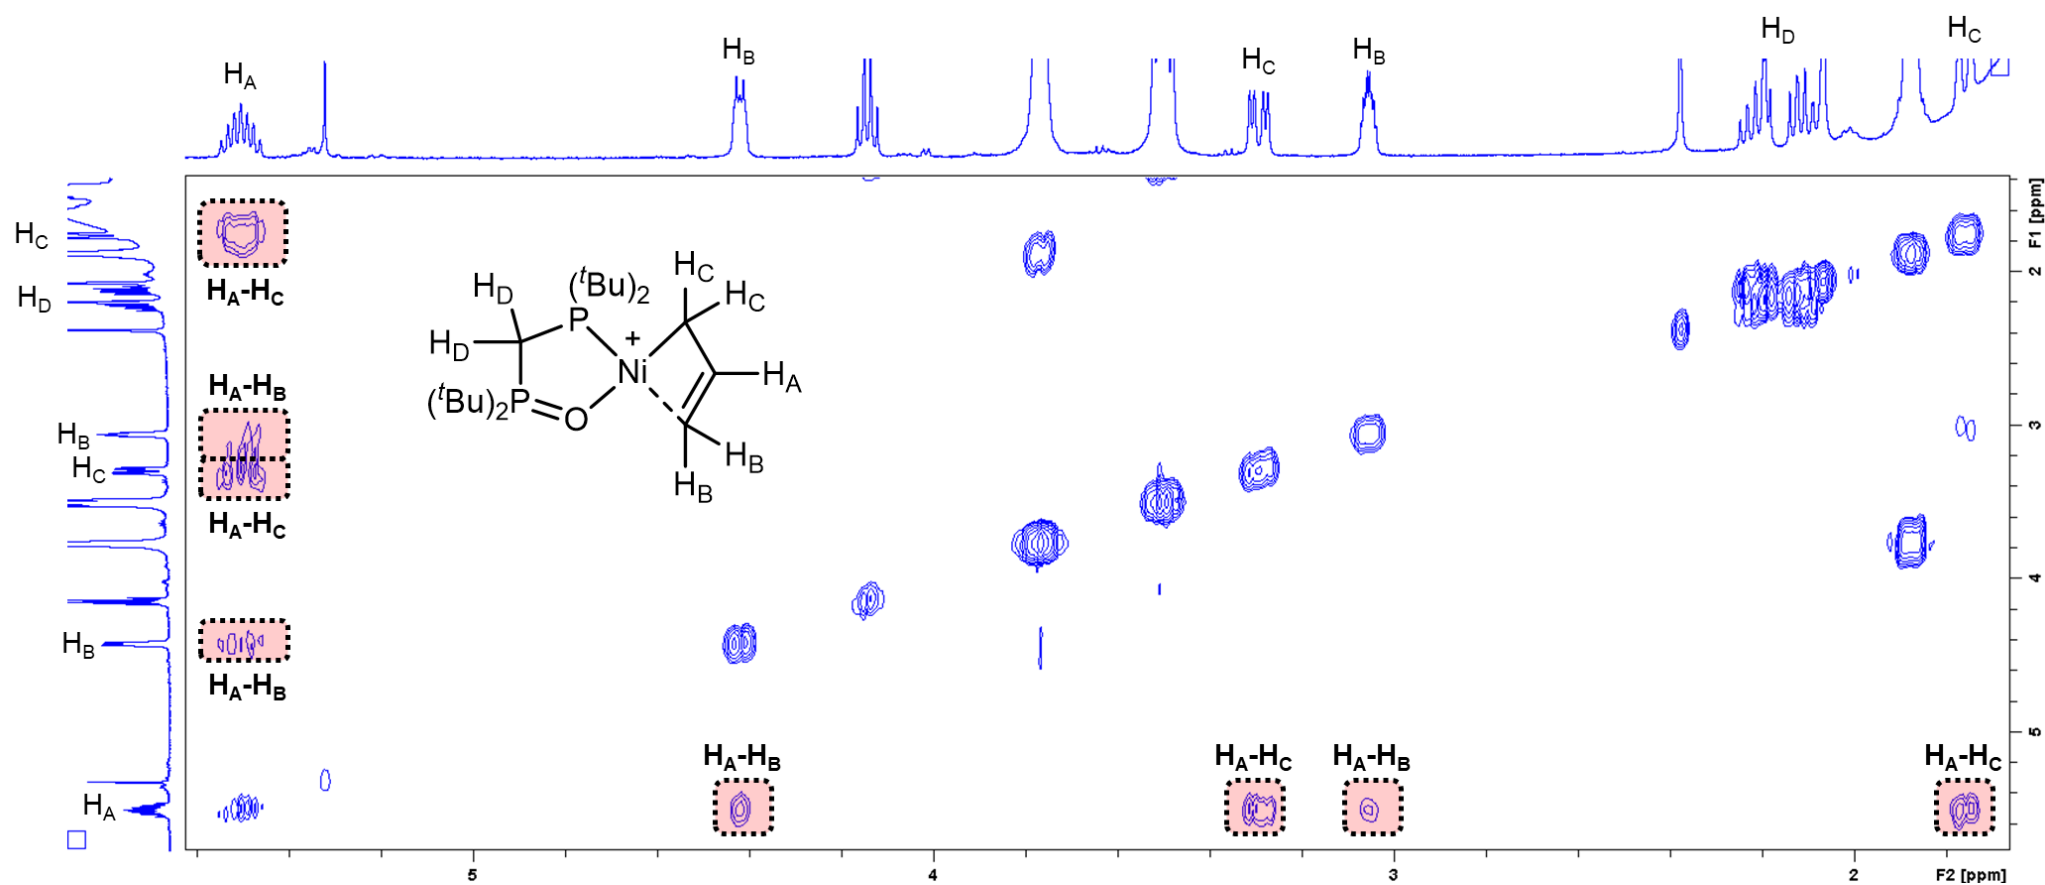

**Figure S4.**  $^1\text{H}$ - $^1\text{H}$  COSY NMR spectrum of the complex **3** ( $\text{CDCl}_3$ , rt).

## NMR spectra of polymer from Table 2

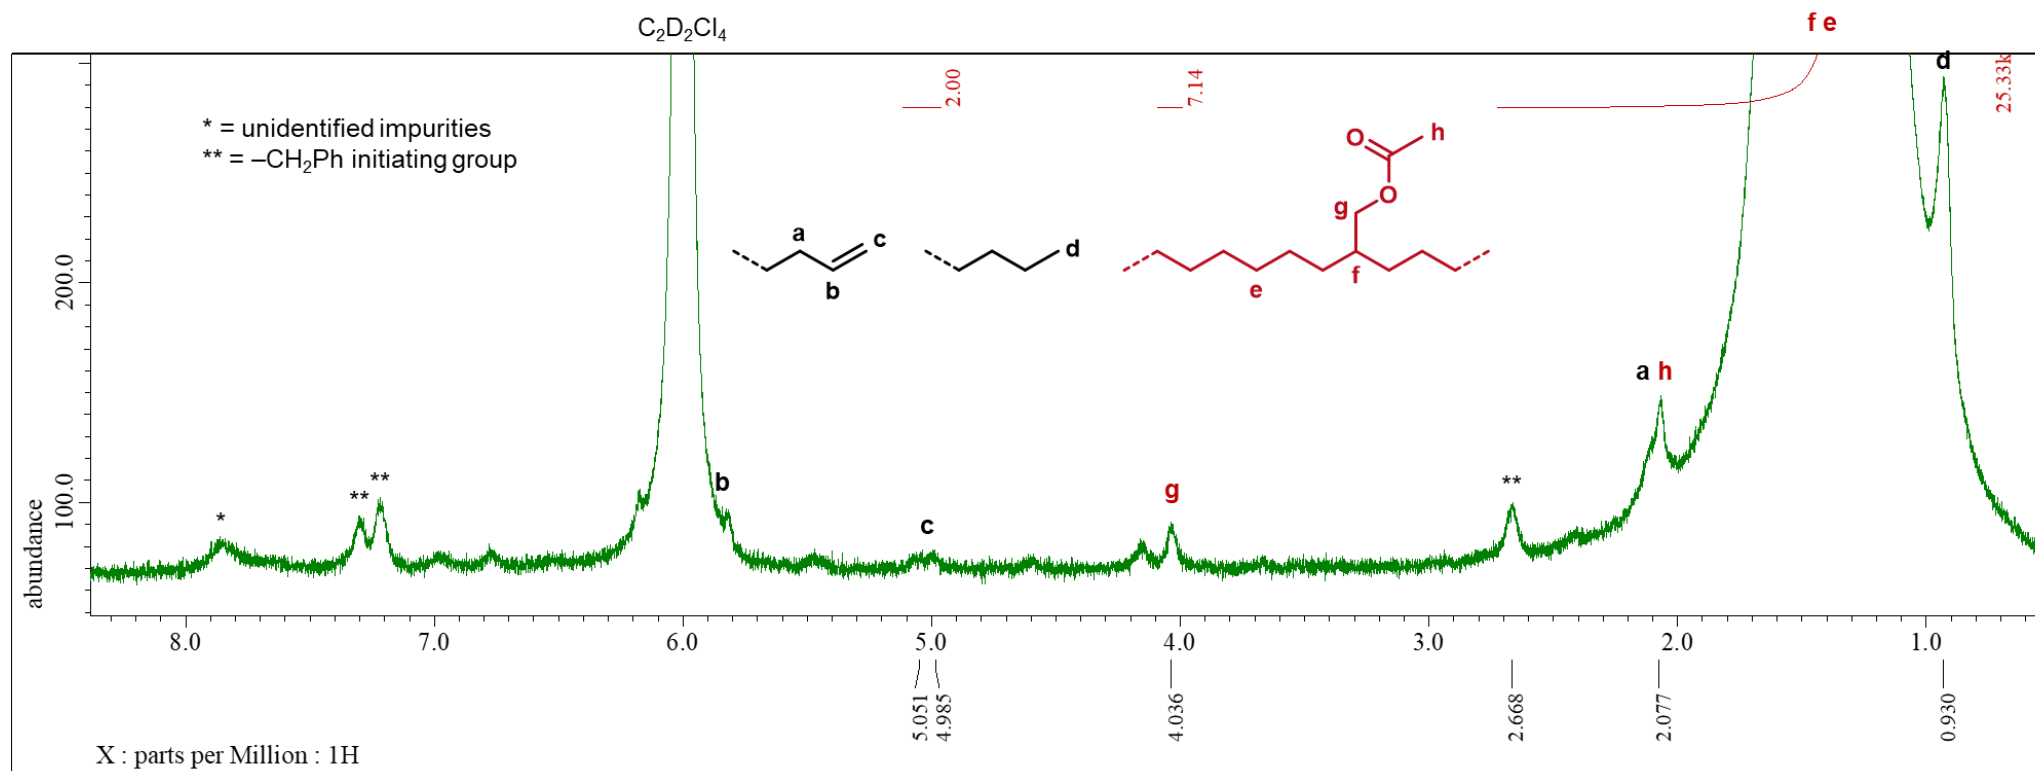

**Figure S5.** <sup>1</sup>H NMR spectrum of the ethylene / allyl acetate copolymer obtained in Table 2, entry 2 (C<sub>2</sub>D<sub>2</sub>Cl<sub>4</sub>, 120 °C, relaxation delay 5 s). Peak assignments were based on the literature.<sup>3</sup>

Note: Calculation of acetate group content in the polyethylene<sup>3</sup>: Assume (1-x) mol% ethylene and x mol% allyl acetate in the copolymer,

$$x = \frac{(g \times 2 \times 100)}{(b + c + j + a + h + f + e + d - g)}$$

Therefore, the acetate group content is calculated as follows: (7.14×2×100)/(2.00+25330-7.14) = 0.06 mol%. This calculation was applied to entire cases in this paper.



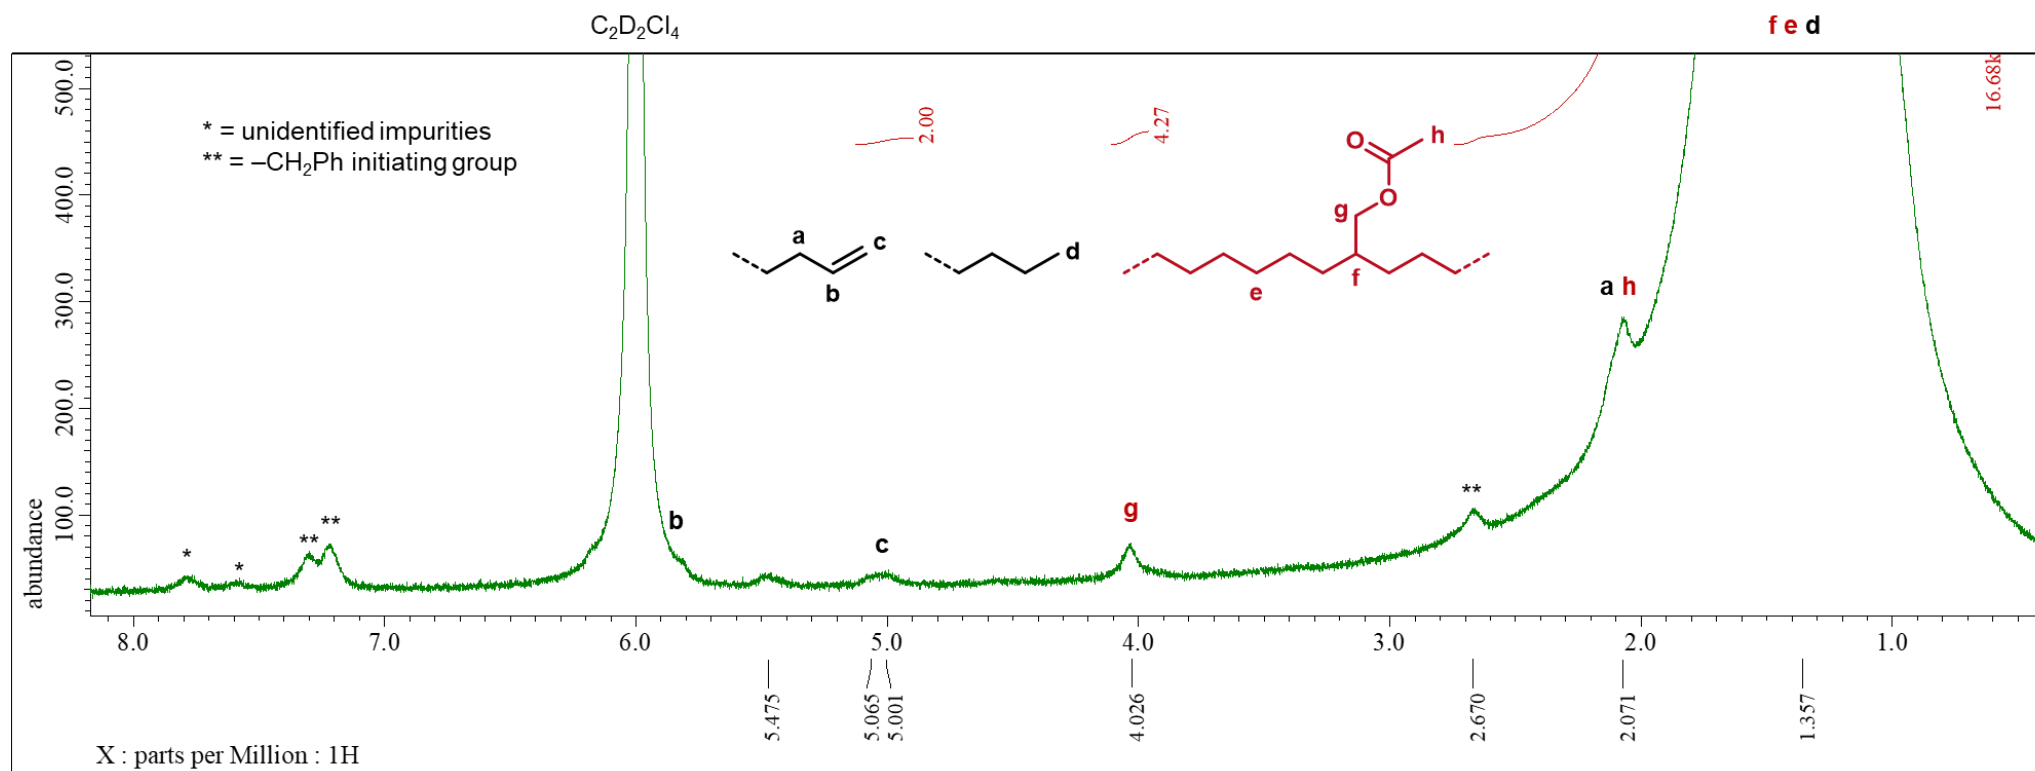

**Figure S6.**  $^1\text{H}$  NMR spectrum of the ethylene / allyl acetate copolymer obtained in Table 2, entry 3 ( $\text{C}_2\text{D}_2\text{Cl}_4$ , 120  $^\circ\text{C}$ , relaxation delay 5 s)

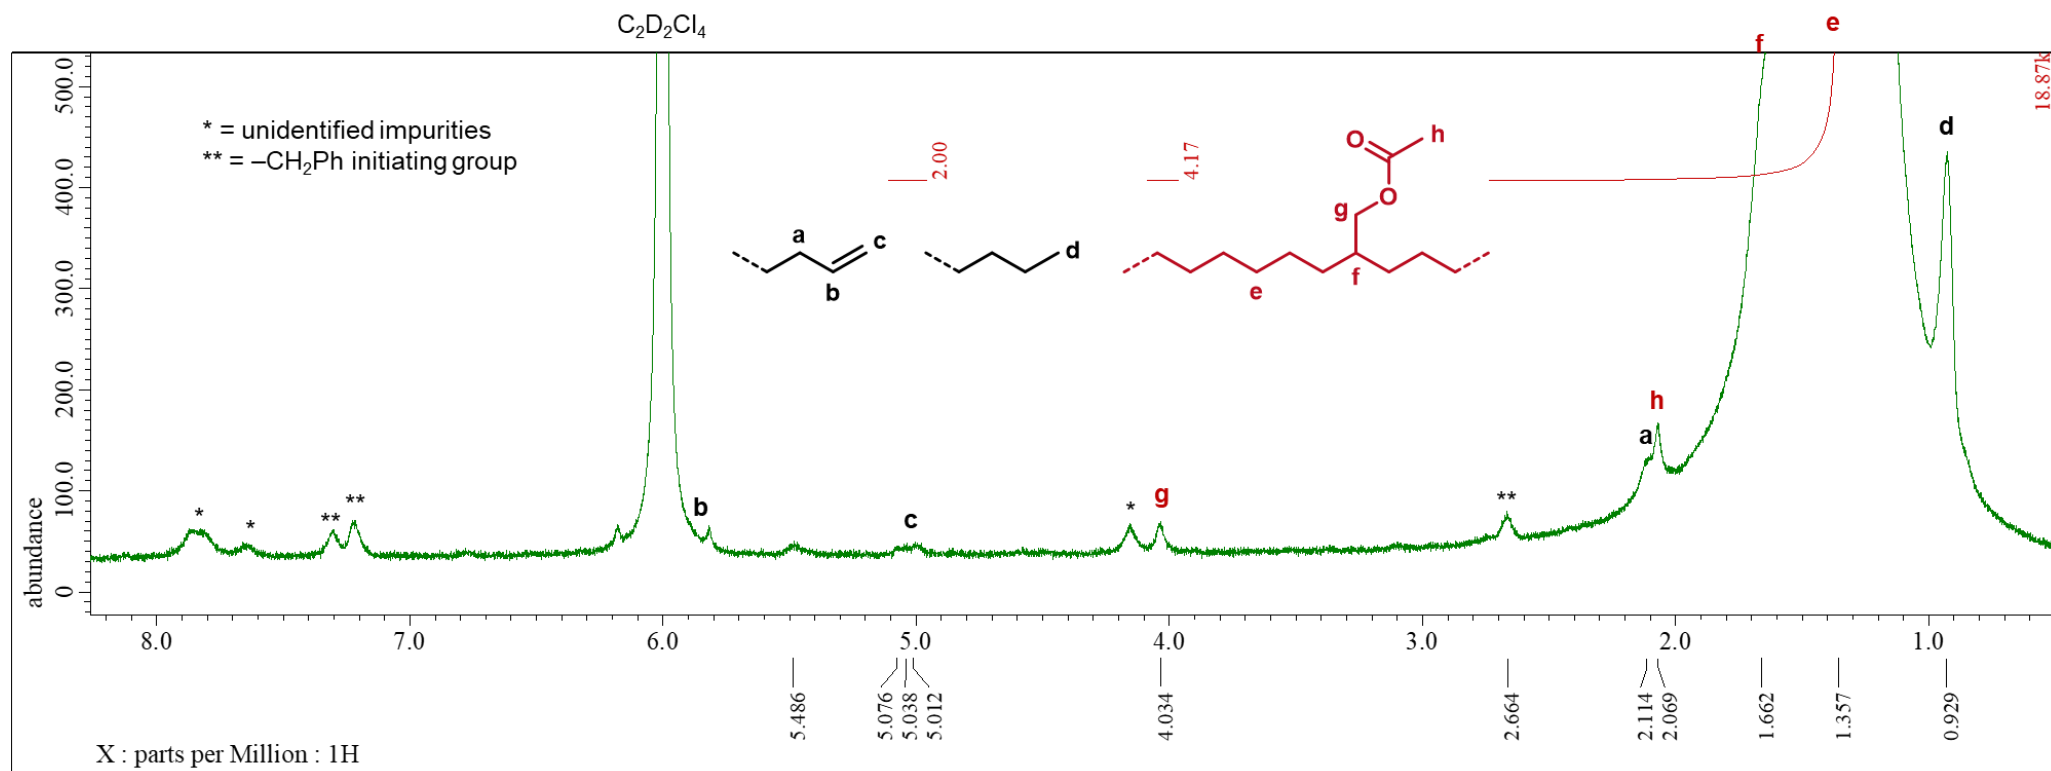

**Figure S7.**  $^1H$  NMR spectrum of the ethylene / allyl acetate copolymer obtained in Table 2, entry 4 ( $C_2D_2Cl_4$ , 120  $^{\circ}C$ , relaxation delay 5 s).

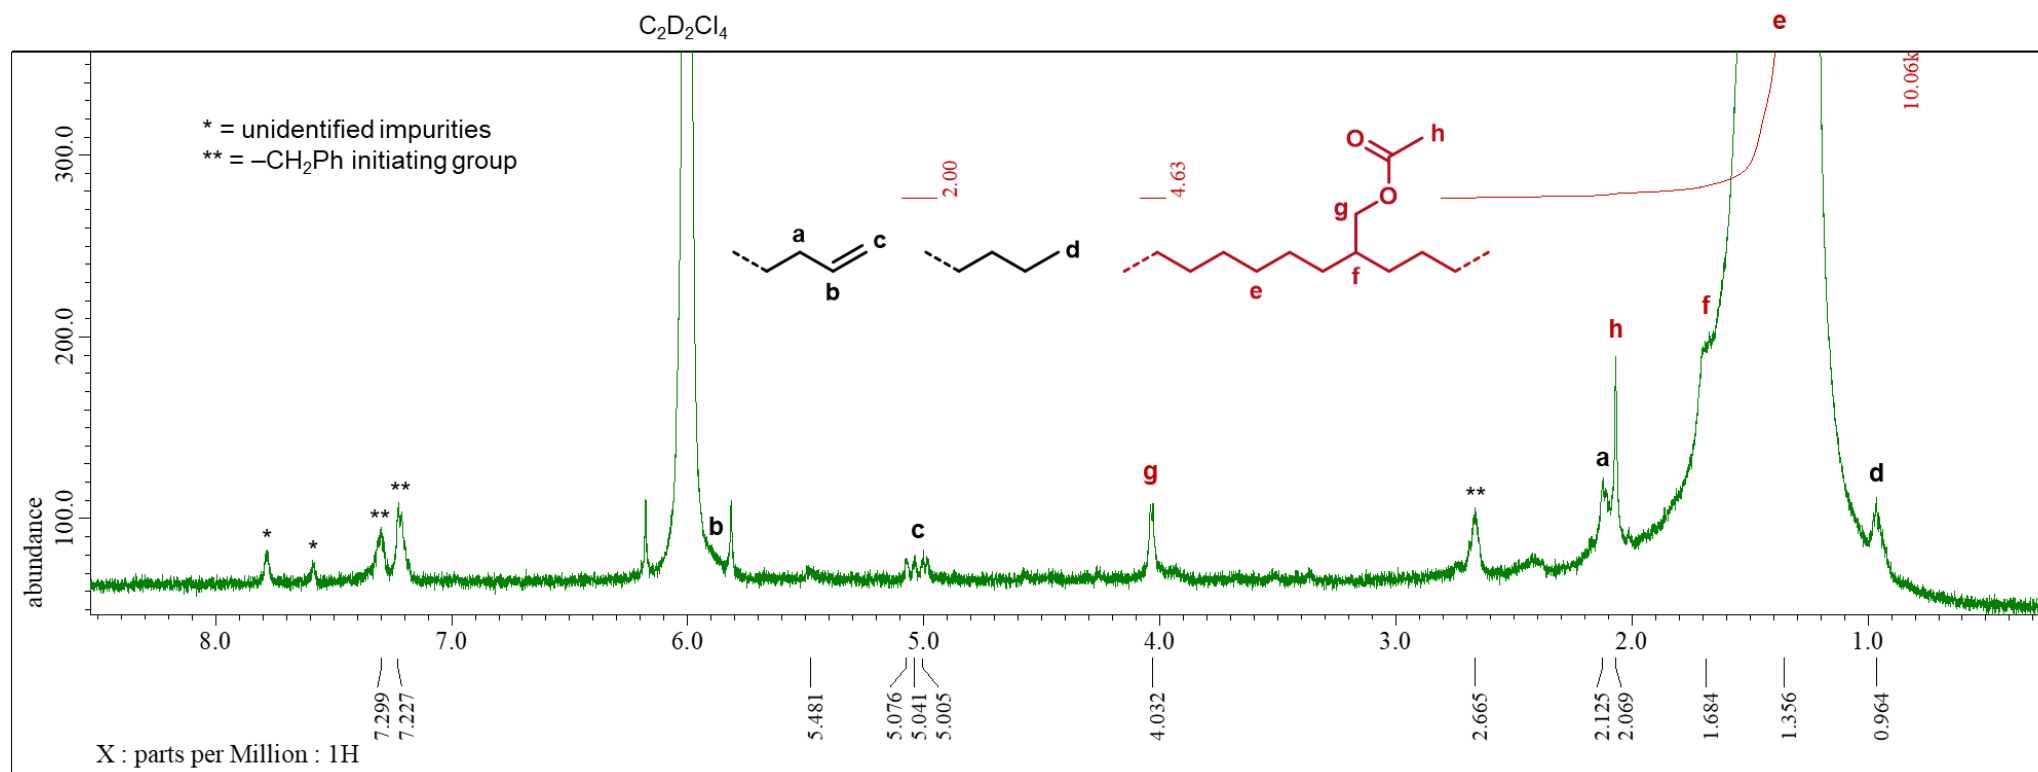

**Figure S8.**  $^1H$  NMR spectrum of the ethylene / allyl acetate copolymer obtained in Table 2, entry 5 ( $C_2D_2Cl_4$ , 120  $^{\circ}C$ , relaxation delay 5 s).

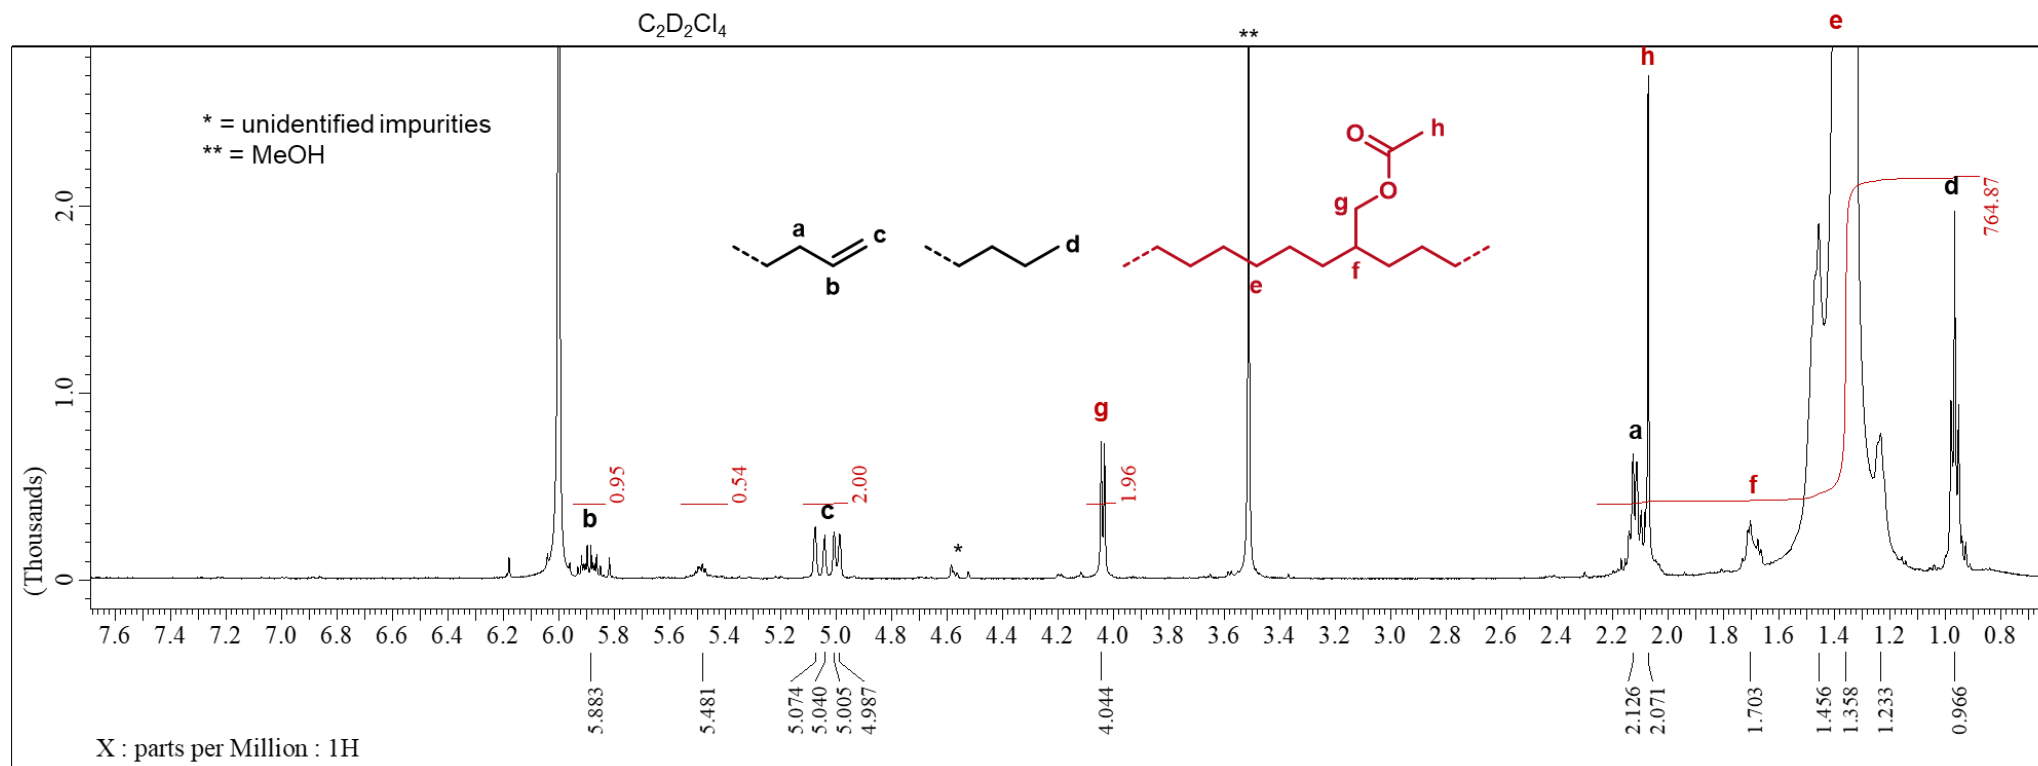

**Figure S9.**  $^1H$  NMR spectrum of the ethylene / allyl acetate copolymer obtained in Table 2, entry 7 ( $C_2D_2Cl_4$ , 120  $^{\circ}C$ , relaxation delay 5 s).

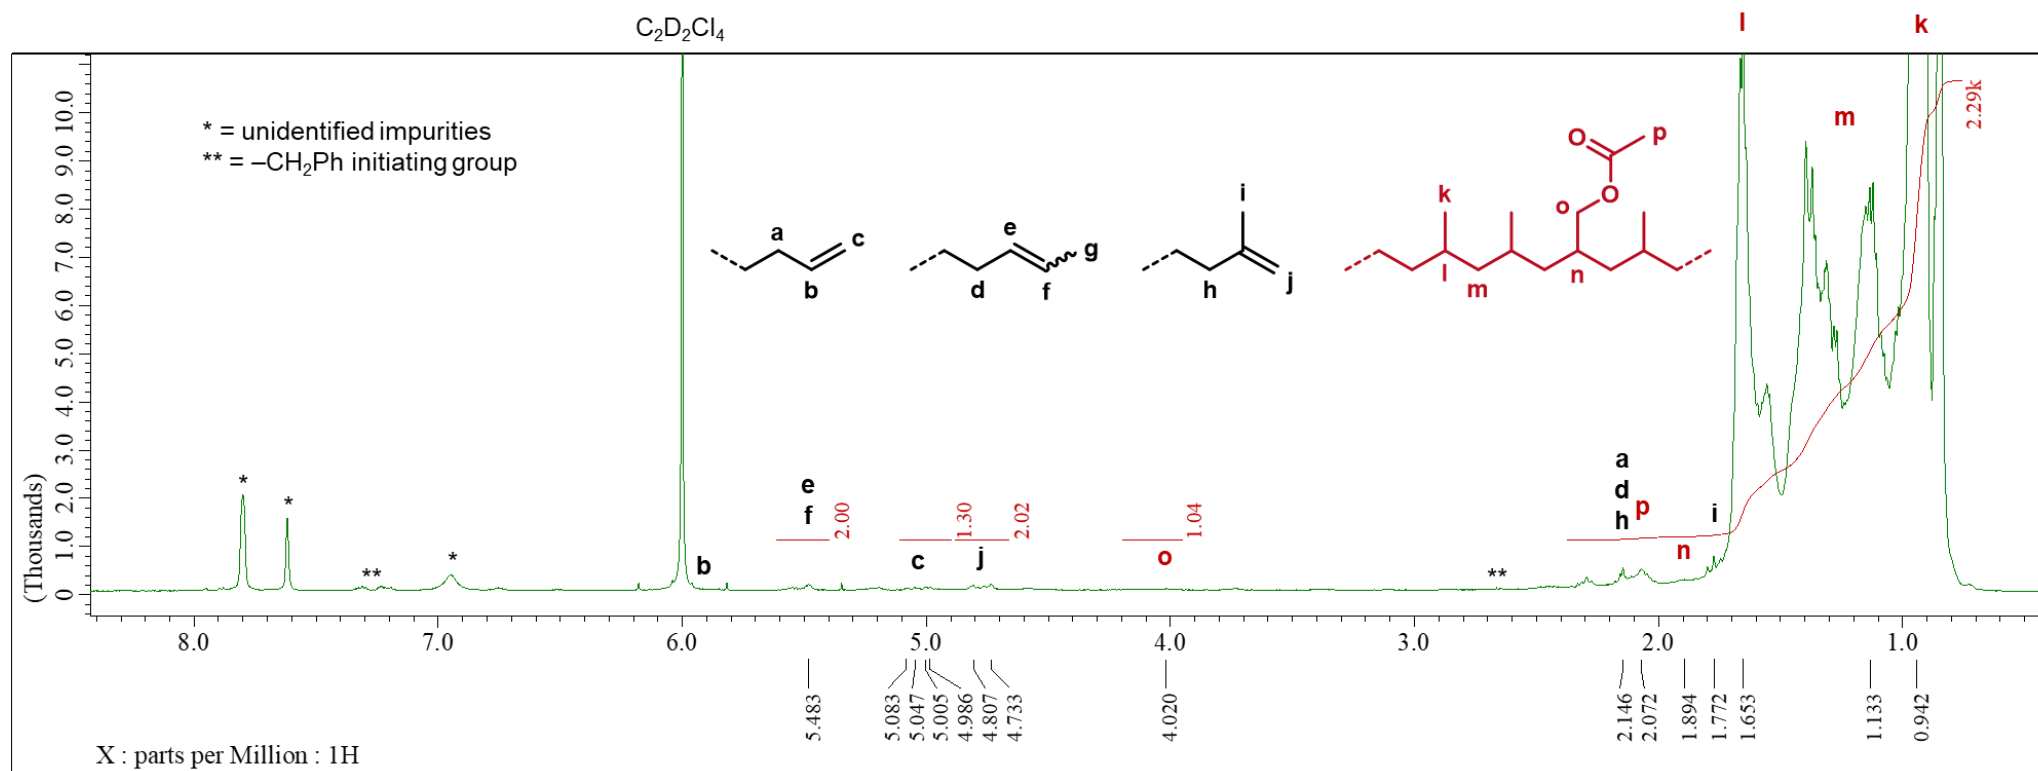

**Figure S10.** <sup>1</sup>H NMR spectrum of the propylene / allyl acetate copolymer obtained in Table 2, entry 6 (C<sub>2</sub>D<sub>2</sub>Cl<sub>4</sub>, 120 °C, relaxation delay 5 s). Peak assignments were based on the literatures.<sup>4-5</sup>

Note: Calculation of acetate group content in the polypropylene<sup>4-5</sup>:

Assume x mol% acetate group in the copolymer,

$$x = \frac{(o/2) \times 100}{(b + e + f + c + j + a + d + h + p + n + i + l + m + k)/6}$$

This calculation was applied to entire cases in this paper.

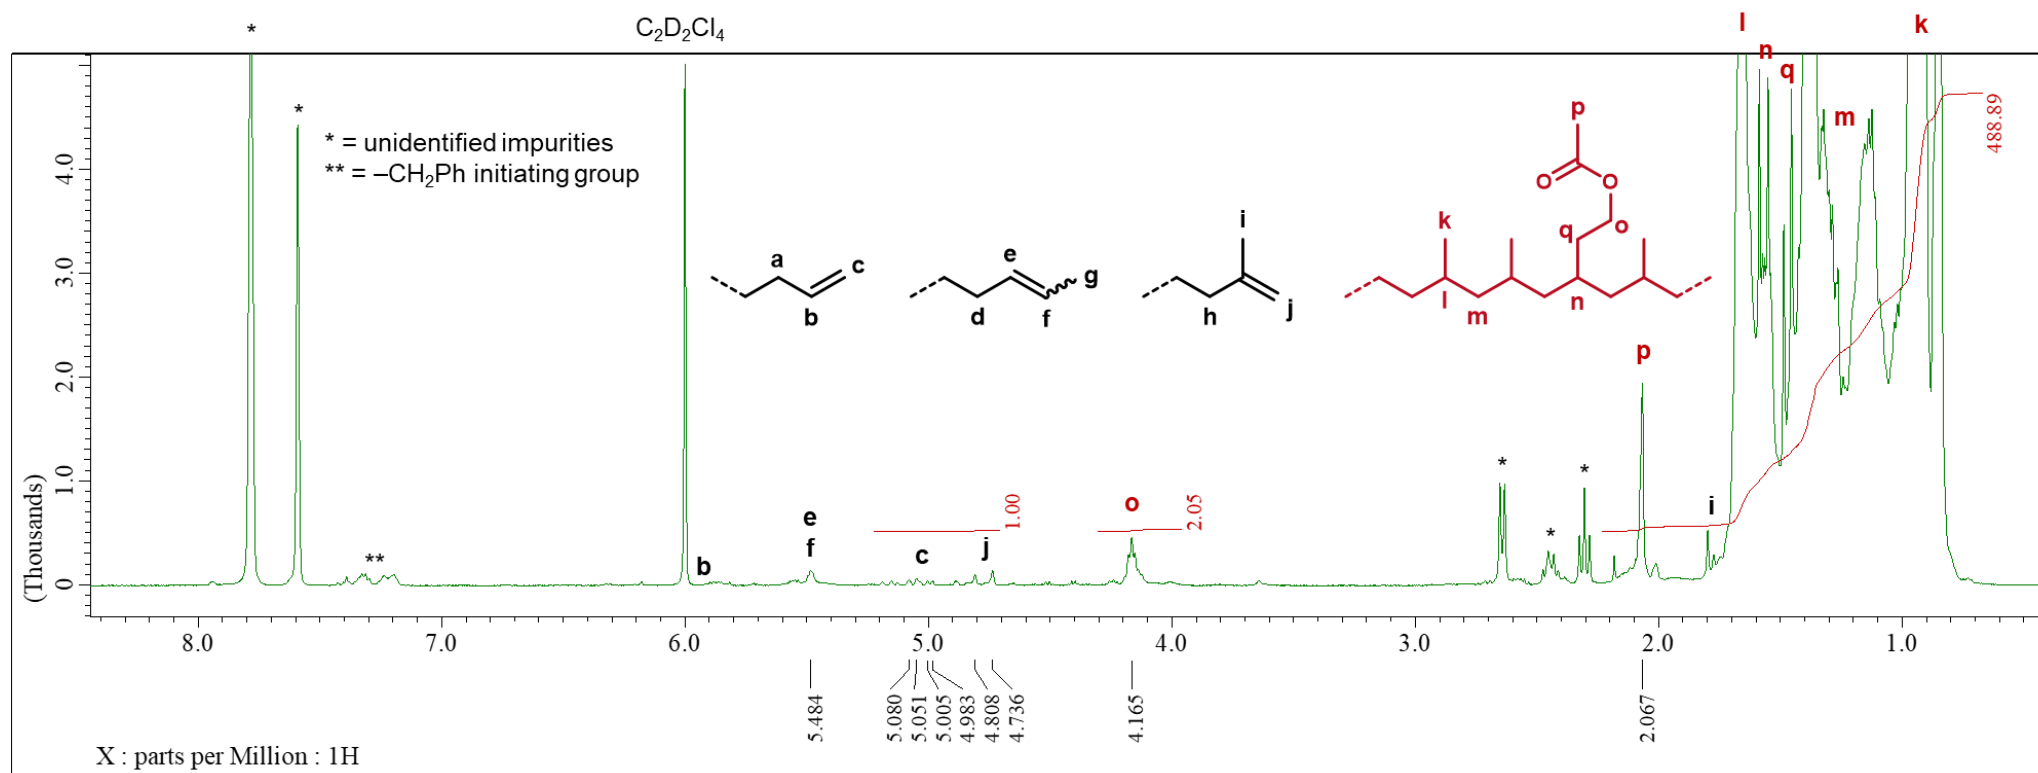

**Figure S11.**  $^1\text{H}$  NMR spectrum of the propylene / 3-butenyl acetate copolymer obtained in Table 2, entry 7 ( $\text{C}_2\text{D}_2\text{Cl}_4$ , 120  $^\circ\text{C}$ , relaxation delay 5 s). Peak assignments were based on the poly(propylene-*co*-allyl acetate)<sup>4-5</sup> and model compound (3-methyl-1-butyl acetate).<sup>6</sup>

# NMR spectra of polymer from Table 3

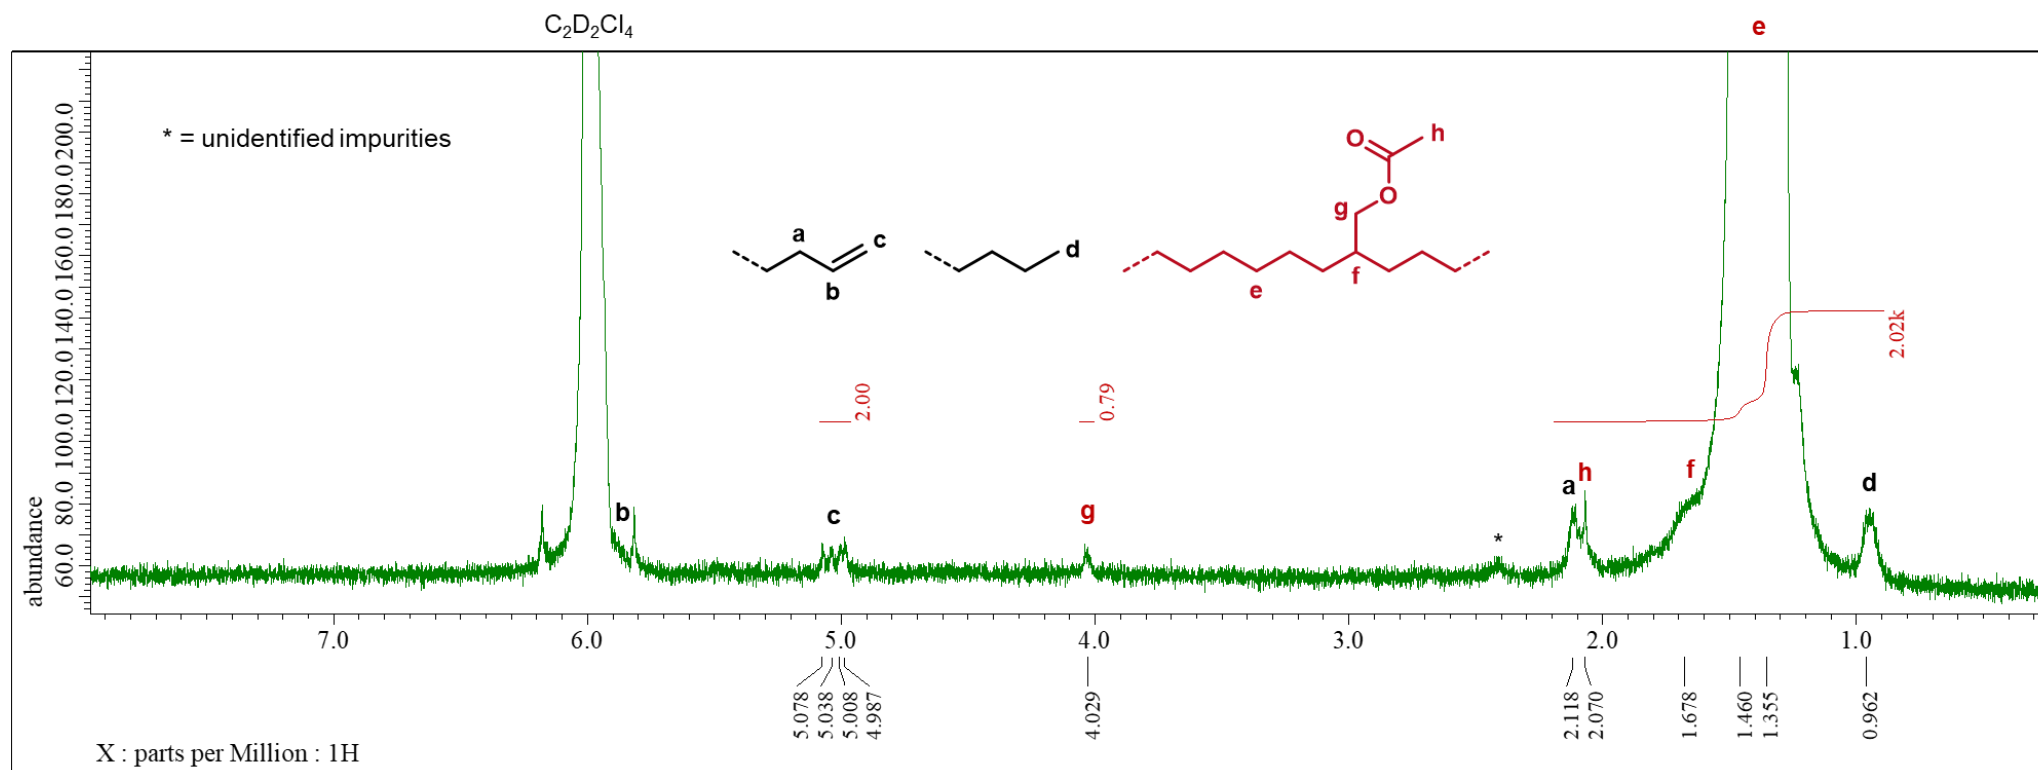

**Figure S12.**  $^1H$  NMR spectrum of the ethylene / allyl acetate copolymer obtained in Table 3, entry 2 ( $C_2D_2Cl_4$ , 120 °C, relaxation delay 5 s).

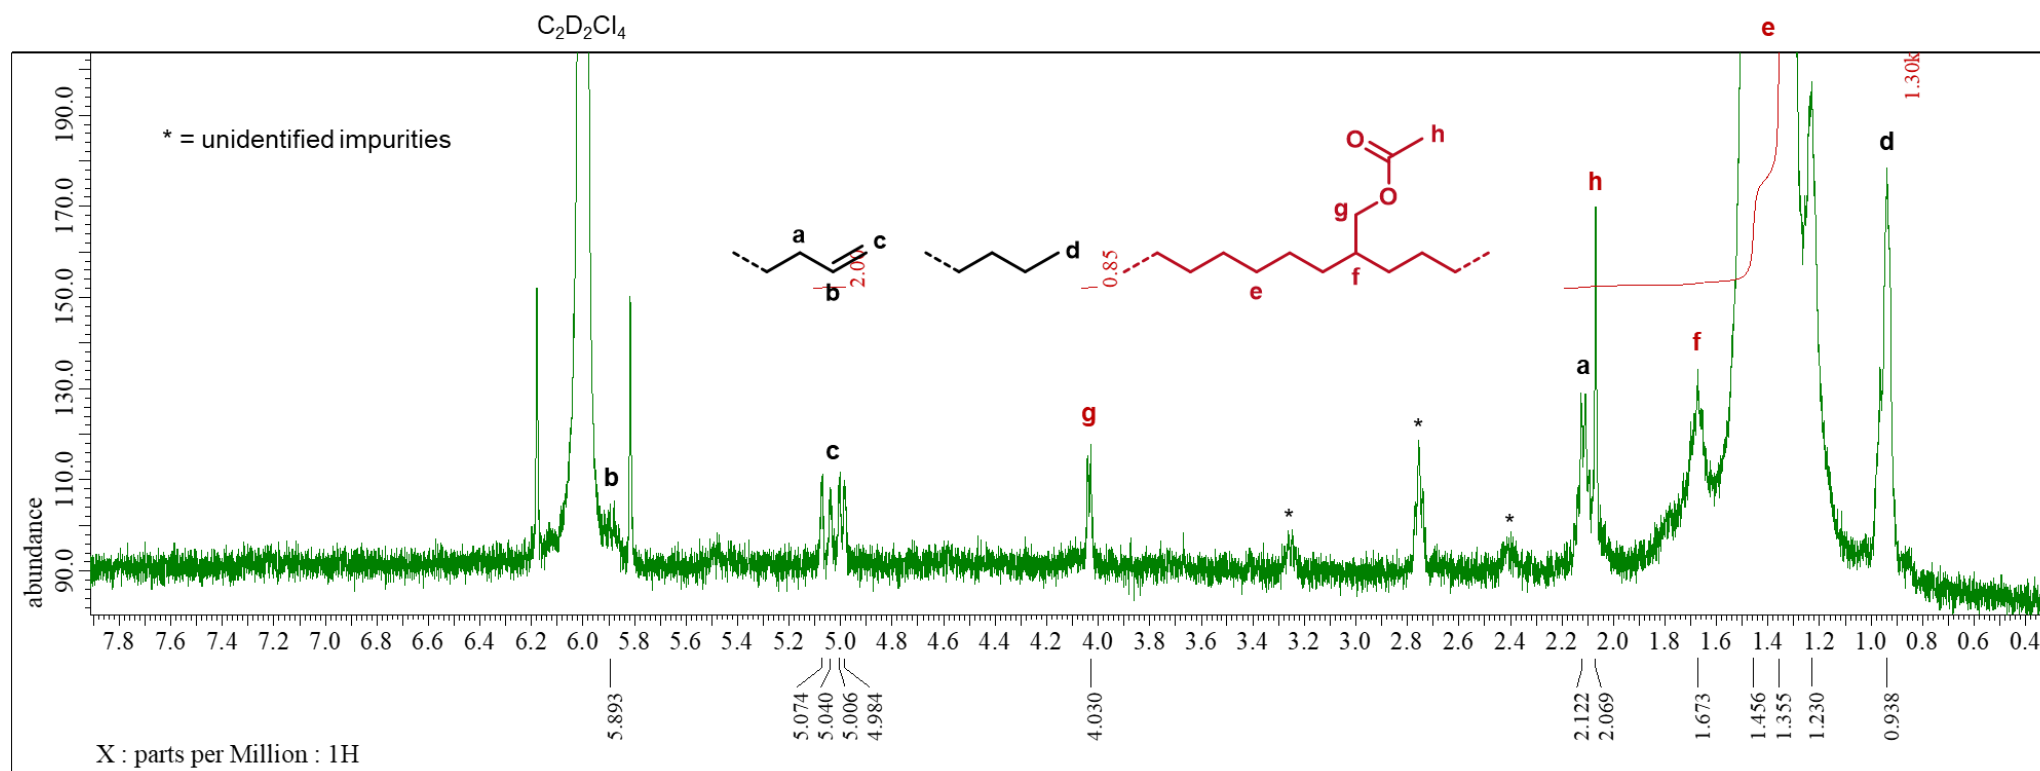

**Figure S13.**  $^1H$  NMR spectrum of the ethylene / allyl acetate copolymer obtained in Table 3, entry 3 ( $C_2D_2Cl_4$ , 120  $^{\circ}C$ , relaxation delay 5 s).



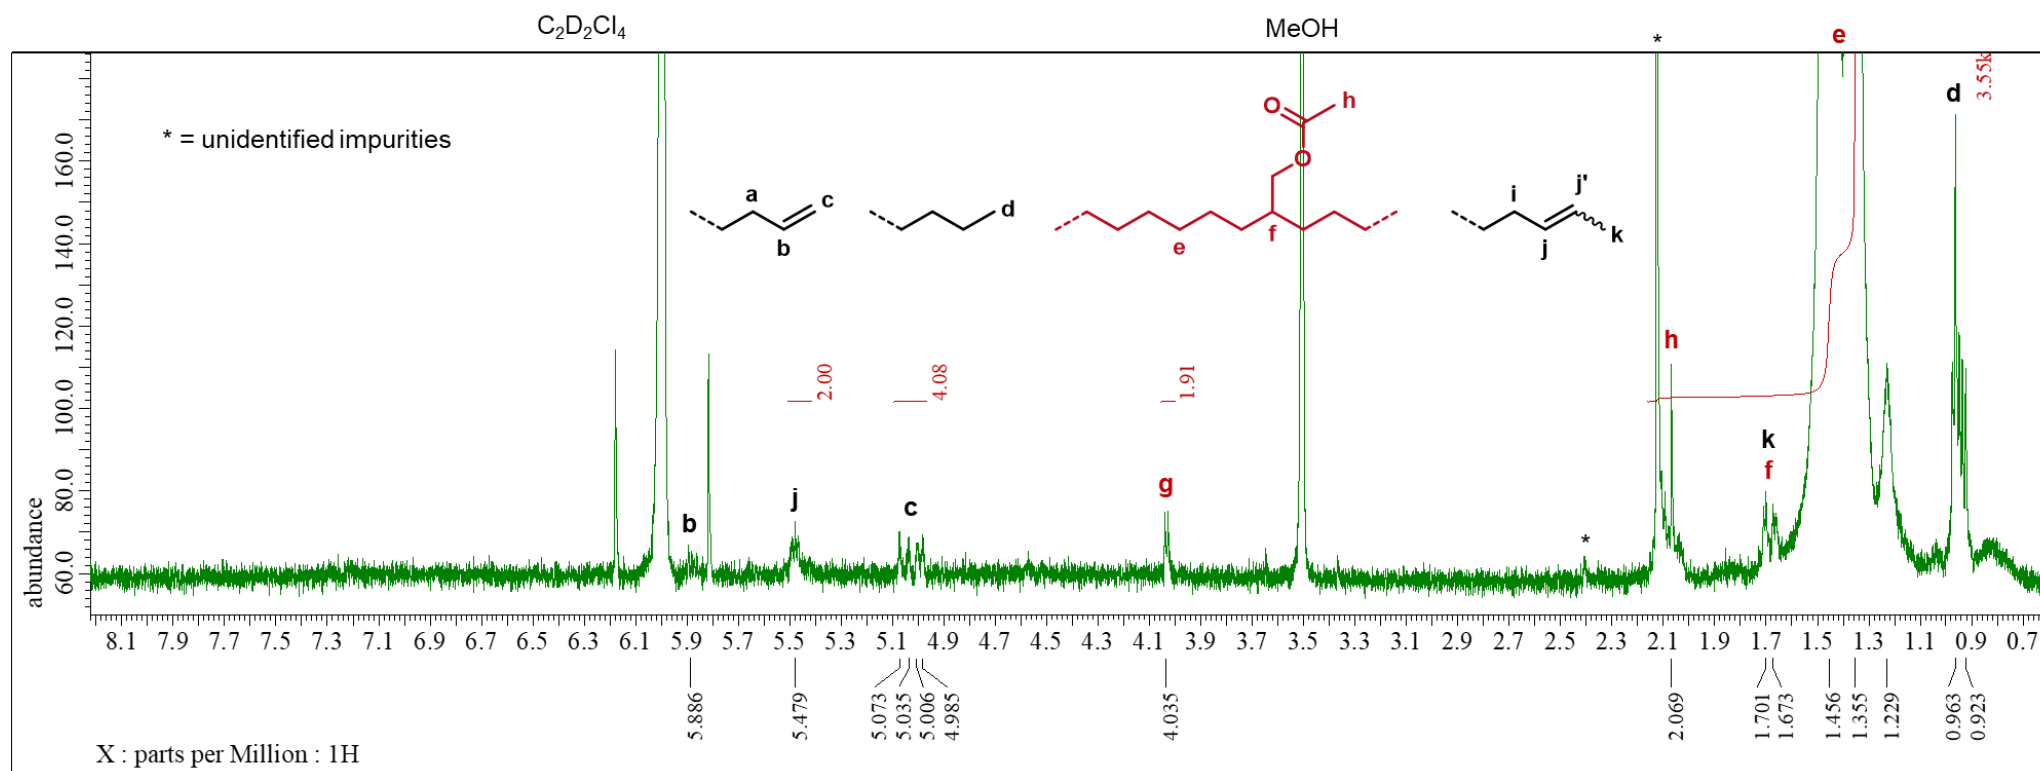

**Figure S14.**  $^1H$  NMR spectrum of the ethylene / allyl acetate copolymer obtained in Table 3, entry 4 ( $C_2D_2Cl_4$ , 120  $^{\circ}C$ , relaxation delay 5 s).

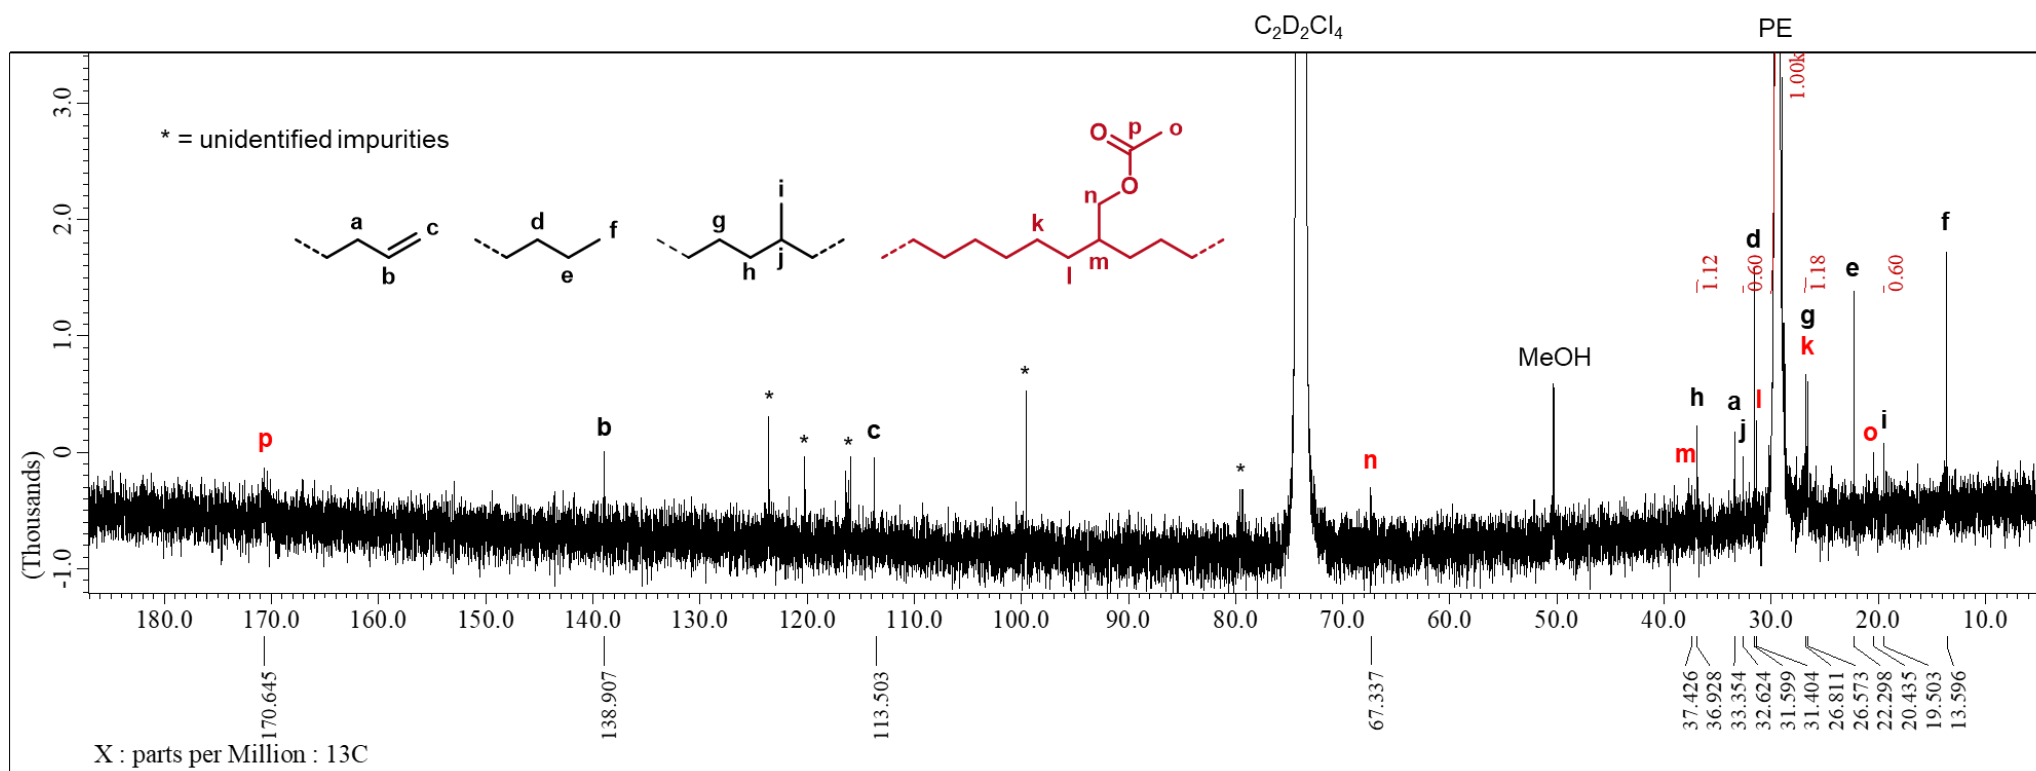

**Figure S15.** Quantitative  $^{13}C$  NMR spectrum of the ethylene / allyl acetate copolymer obtained in Table 3, entry 4 ( $C_2D_2Cl_4$ , 120  $^{\circ}C$ ). Peak assignments were based on the literature.<sup>1</sup>

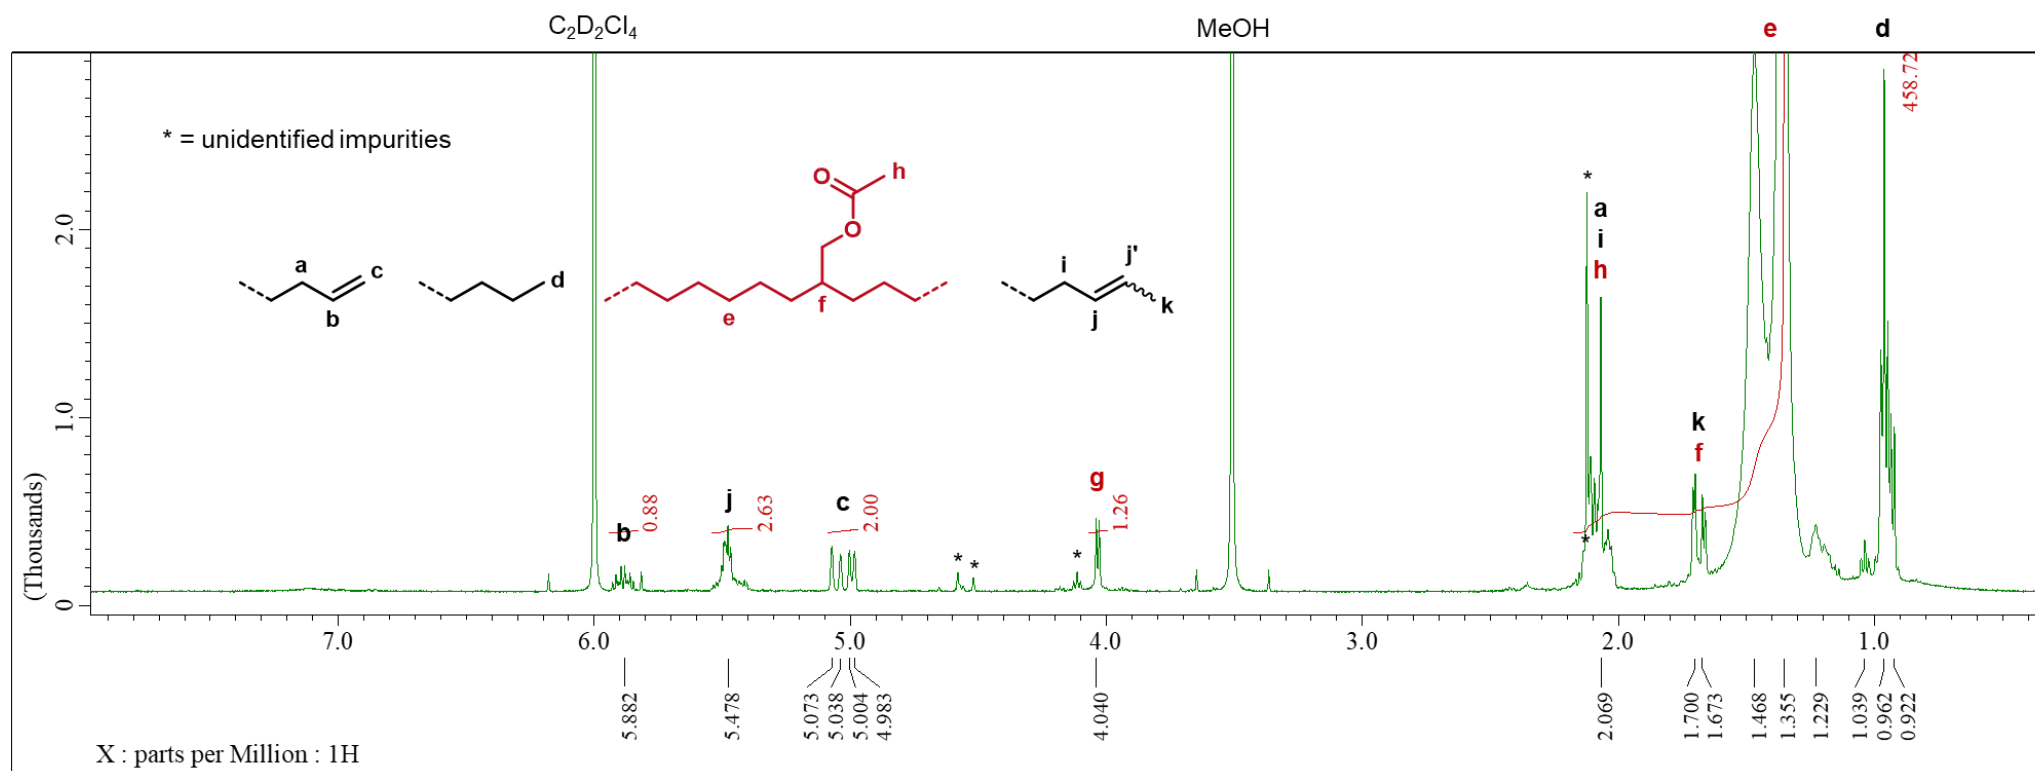

**Figure S16.**  $^1\text{H}$  NMR spectrum of the ethylene / allyl acetate copolymer obtained in Table 3, entry 5 ( $\text{C}_2\text{D}_2\text{Cl}_4$ , 120  $^\circ\text{C}$ , relaxation delay 5 s).

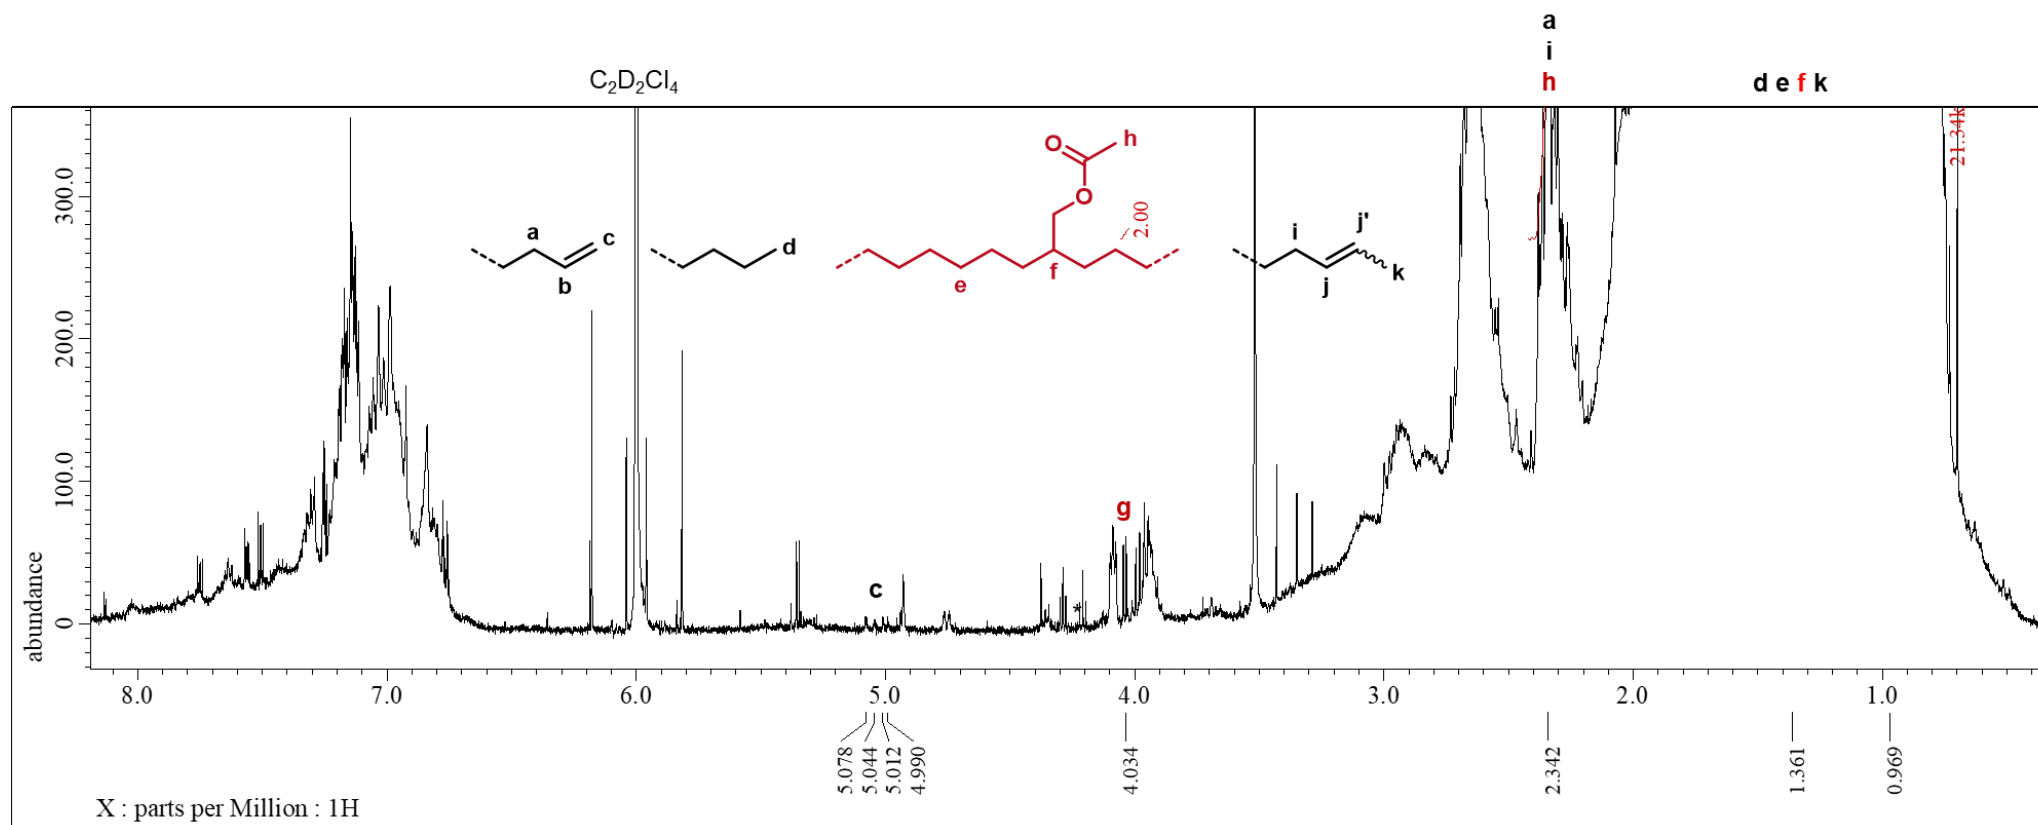

**Figure S17.**  $^1H$  NMR spectrum of the polymer recovered from SEC eluent (retention time 18–20 min.,  $C_2D_2Cl_4$ , 120 °C, relaxation delay 5 s). Polymer from Table 3, entry 5 was used to the SEC measurement. Unassigned peaks were incorporated during SEC analysis and recollecting sample.

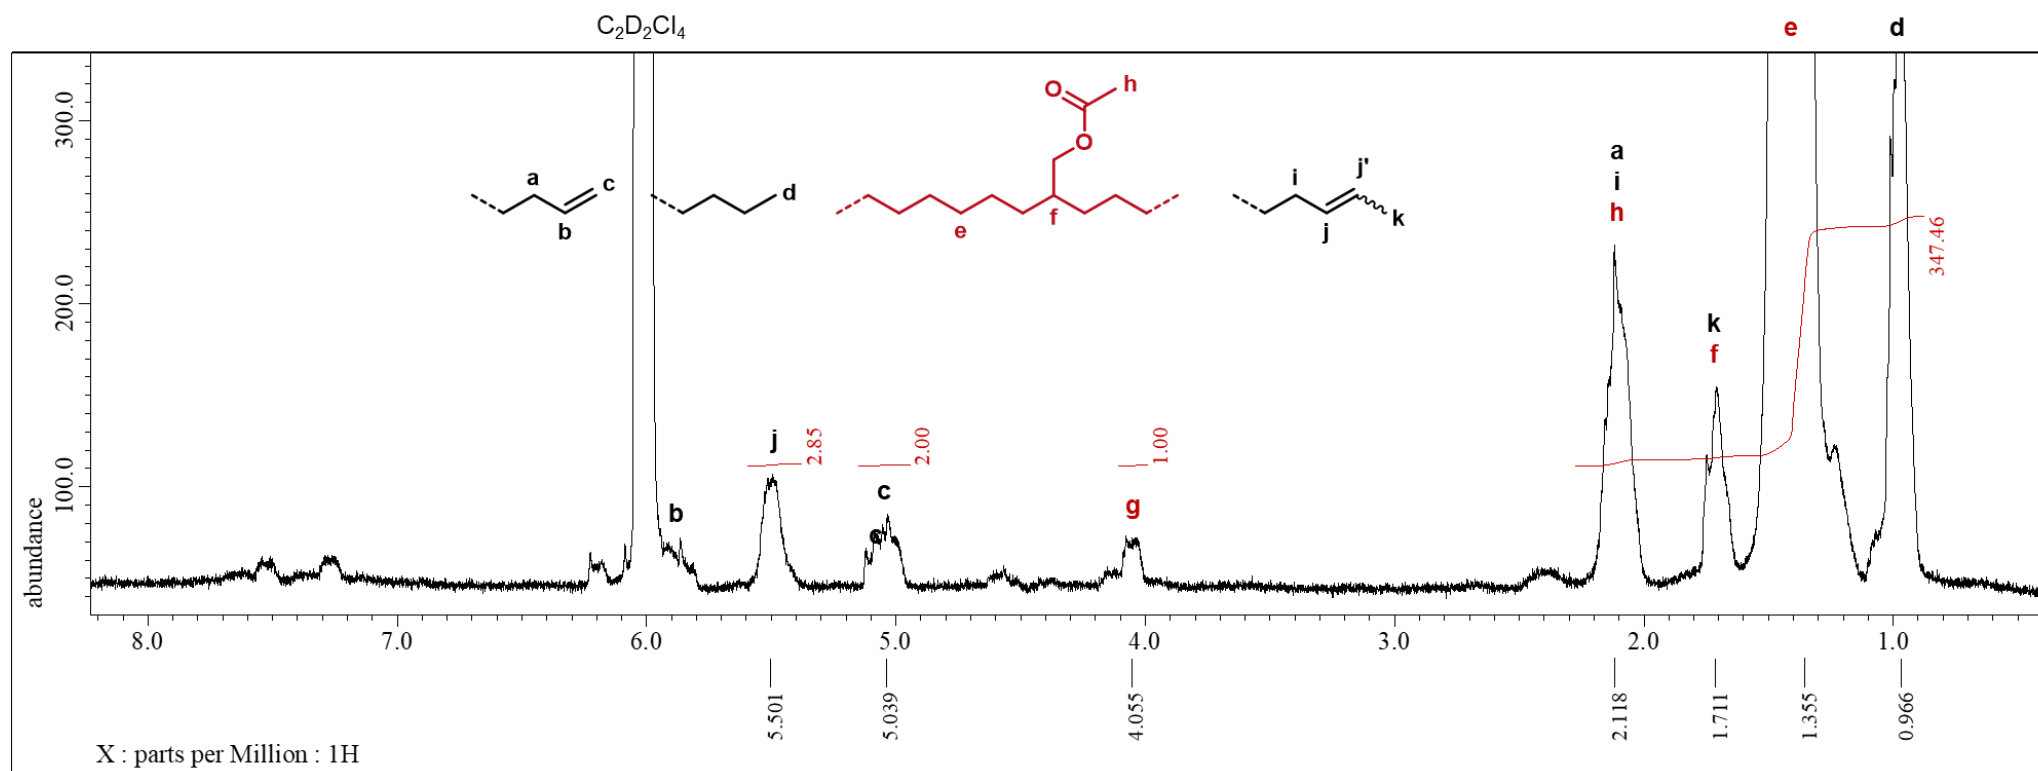

**Figure S18.**  $^1H$  NMR spectrum of the polymer recovered from SEC eluent (retention time 21–23 min.,  $C_2D_2Cl_4$ , 120 °C, relaxation delay 5 s). Polymer from Table 3, entry 5 was used to the SEC measurement. Unassigned peaks were incorporated during SEC analysis and recollecting sample.

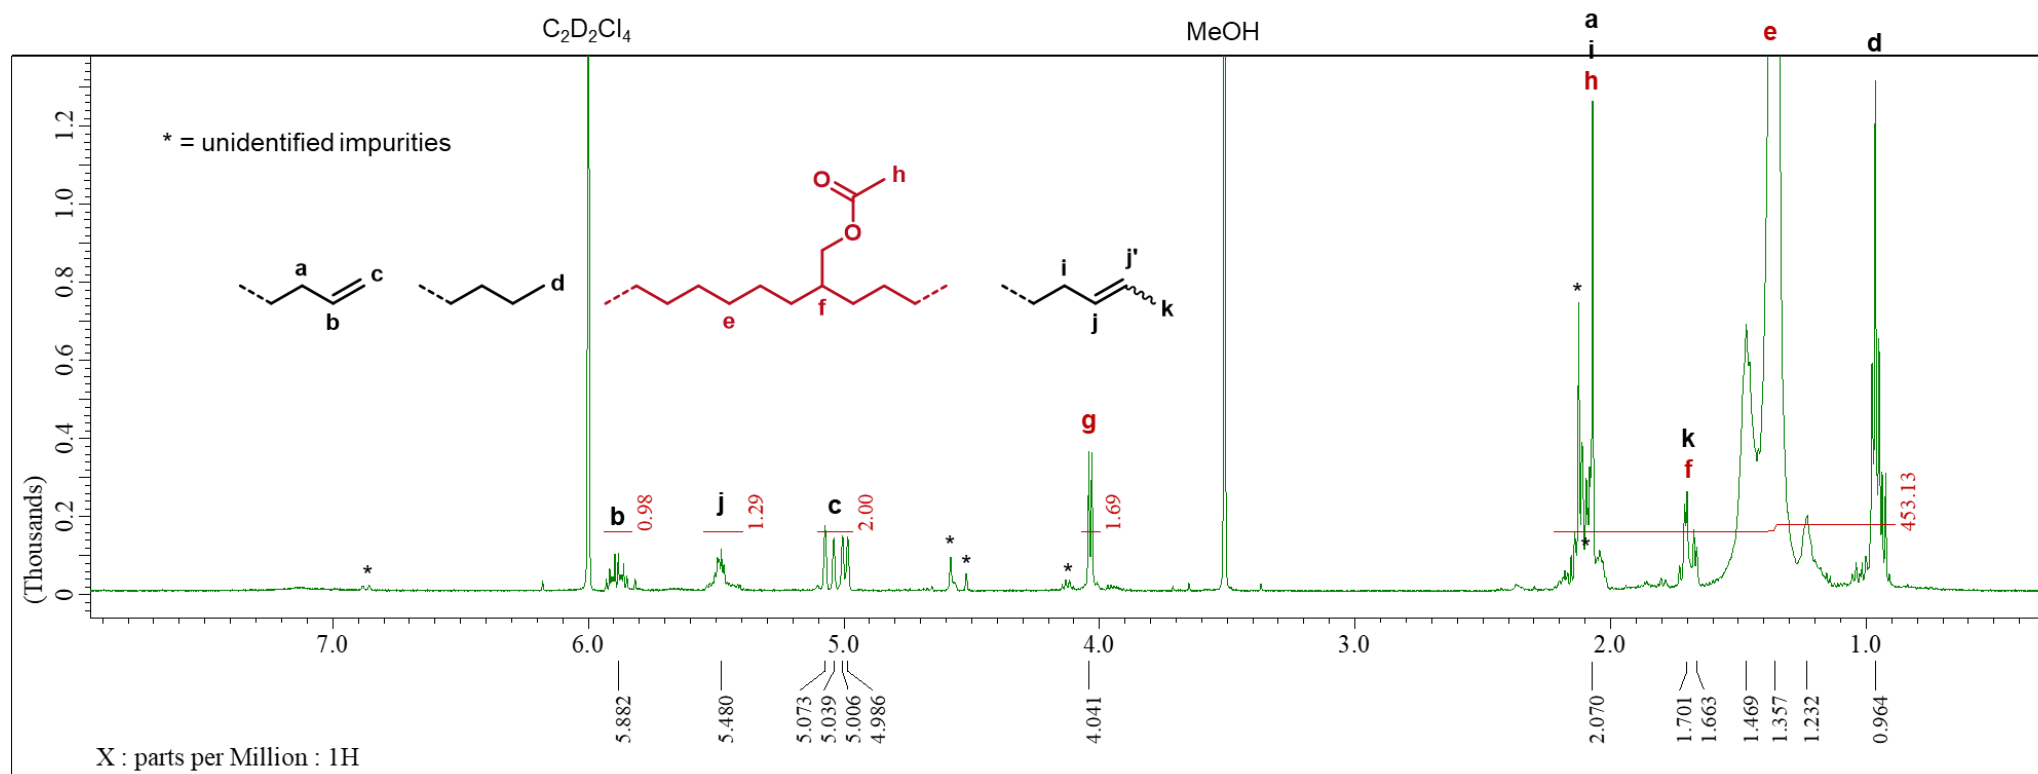

**Figure S19.** <sup>1</sup>H NMR spectrum of the ethylene / allyl acetate copolymer obtained in Table 3, entry 6 (C<sub>2</sub>D<sub>2</sub>Cl<sub>4</sub>, 120 °C, relaxation delay 5 s).

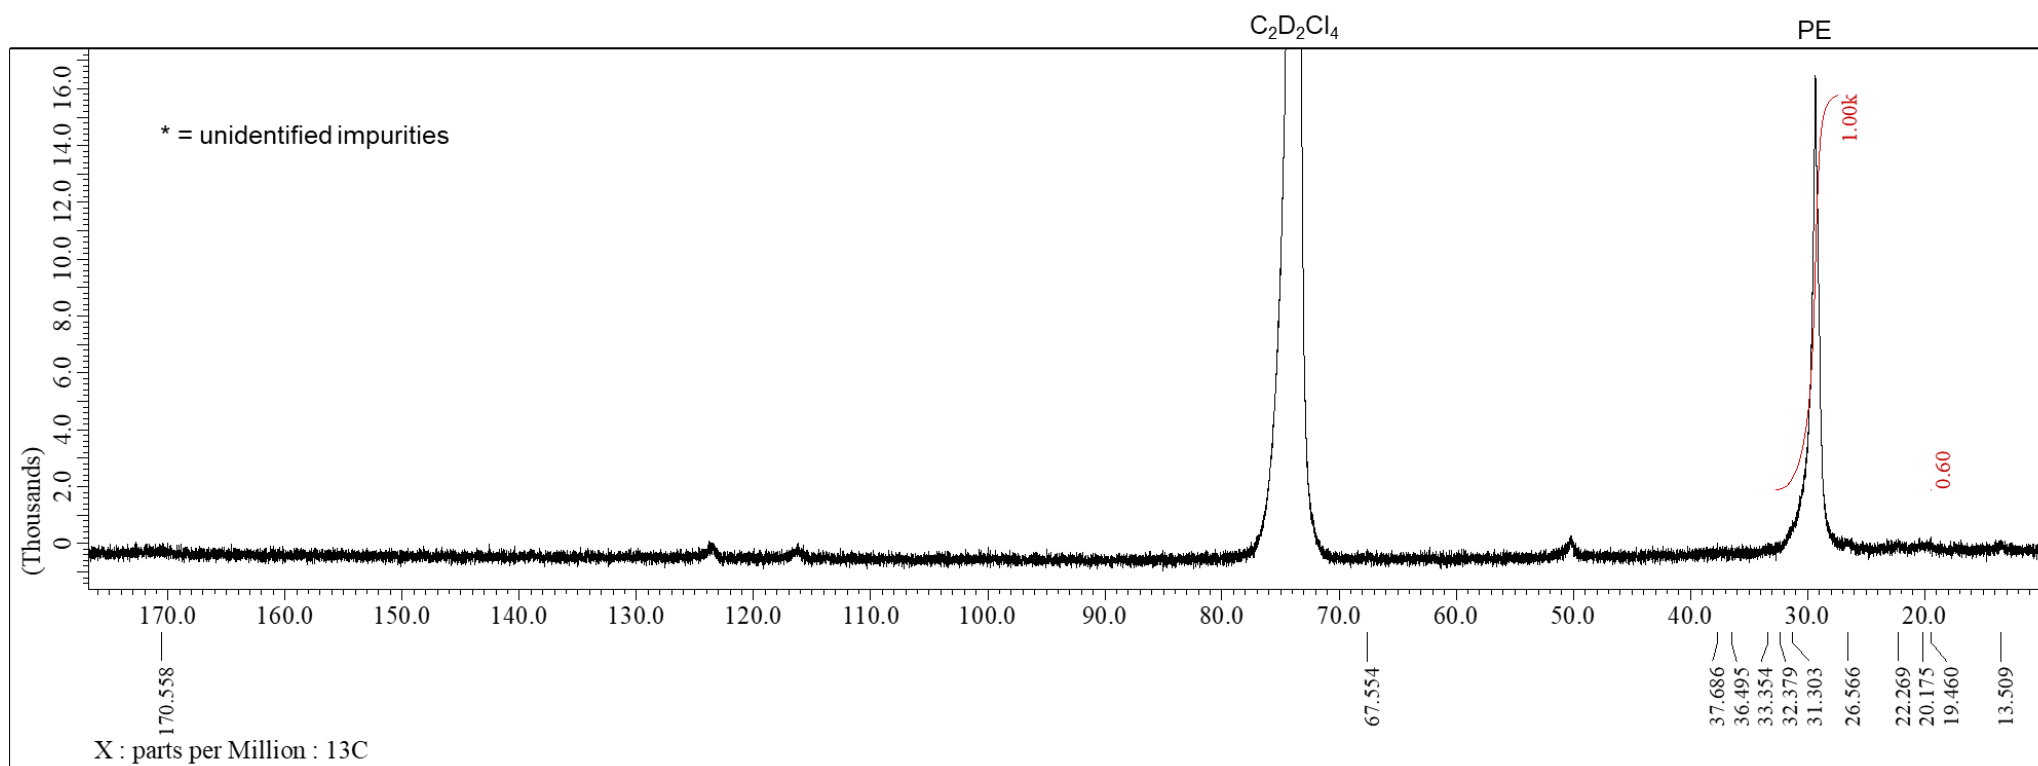

**Figure S20.** Quantitative  $^{13}\text{C}$  NMR spectrum of the ethylene / allyl acetate copolymer obtained in Table 3, entry 6 ( $\text{C}_2\text{D}_2\text{Cl}_4$ , 120  $^\circ\text{C}$ ).

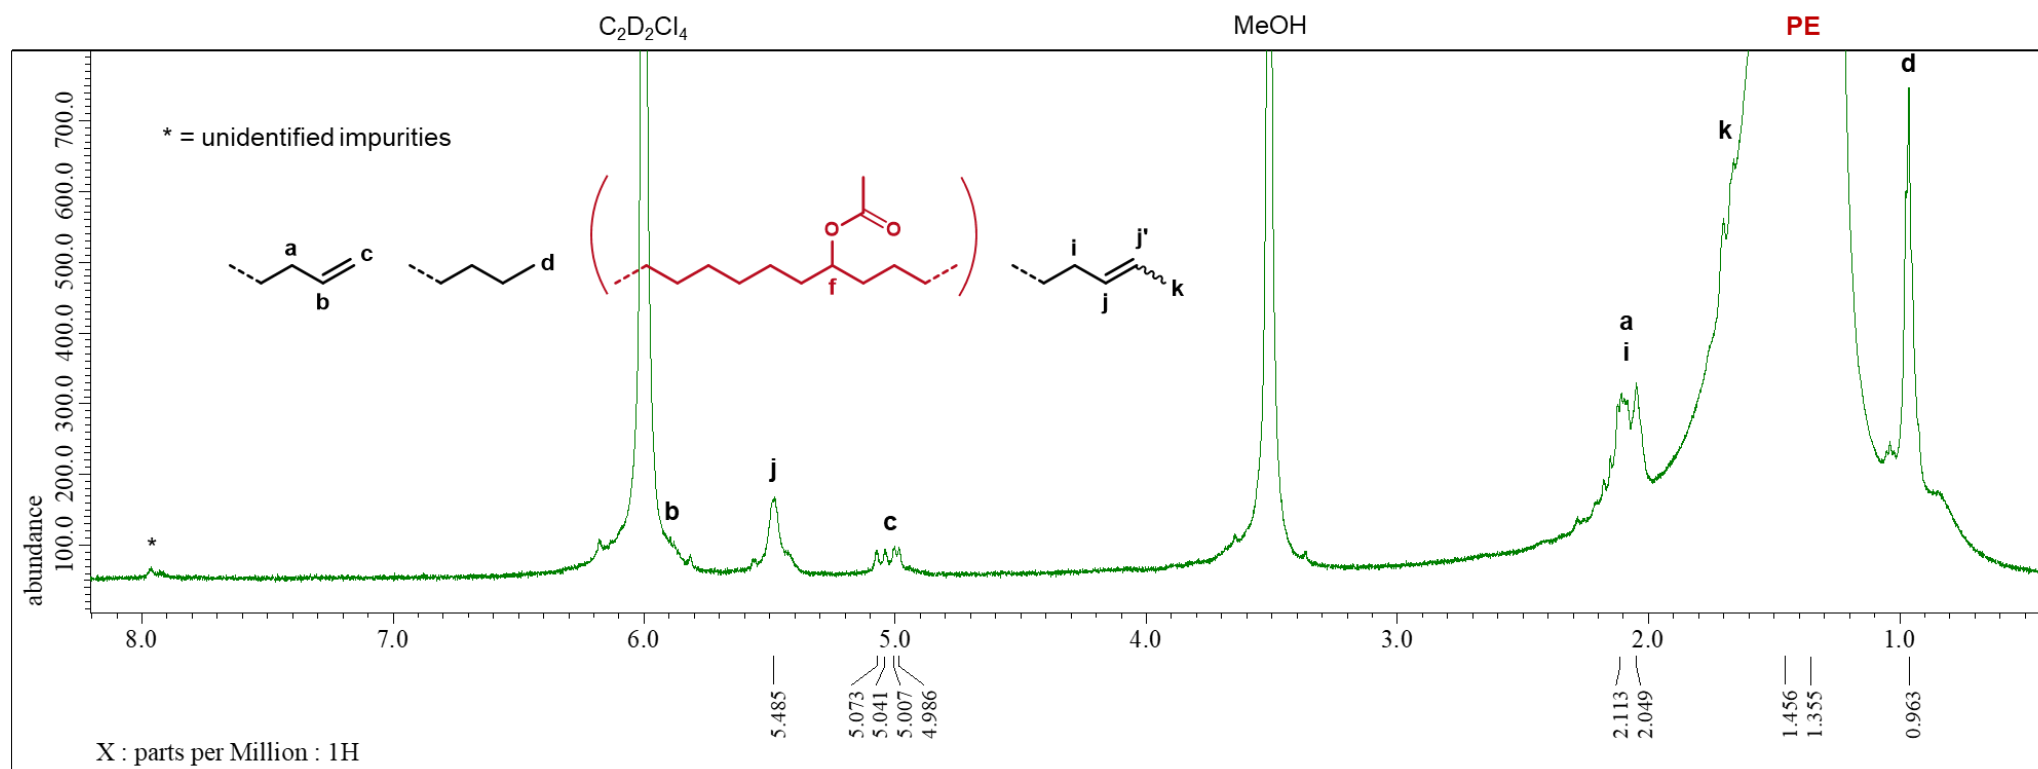

**Figure S21.**  $^1\text{H}$  NMR spectrum of the polyethylene obtained in Table 3, entry 7 ( $\text{C}_2\text{D}_2\text{Cl}_4$ , 120  $^\circ\text{C}$ , relaxation delay 5 s). Characteristic peak of acetoxy group (f at 4.90–4.80 ppm)<sup>7</sup> was not detected.



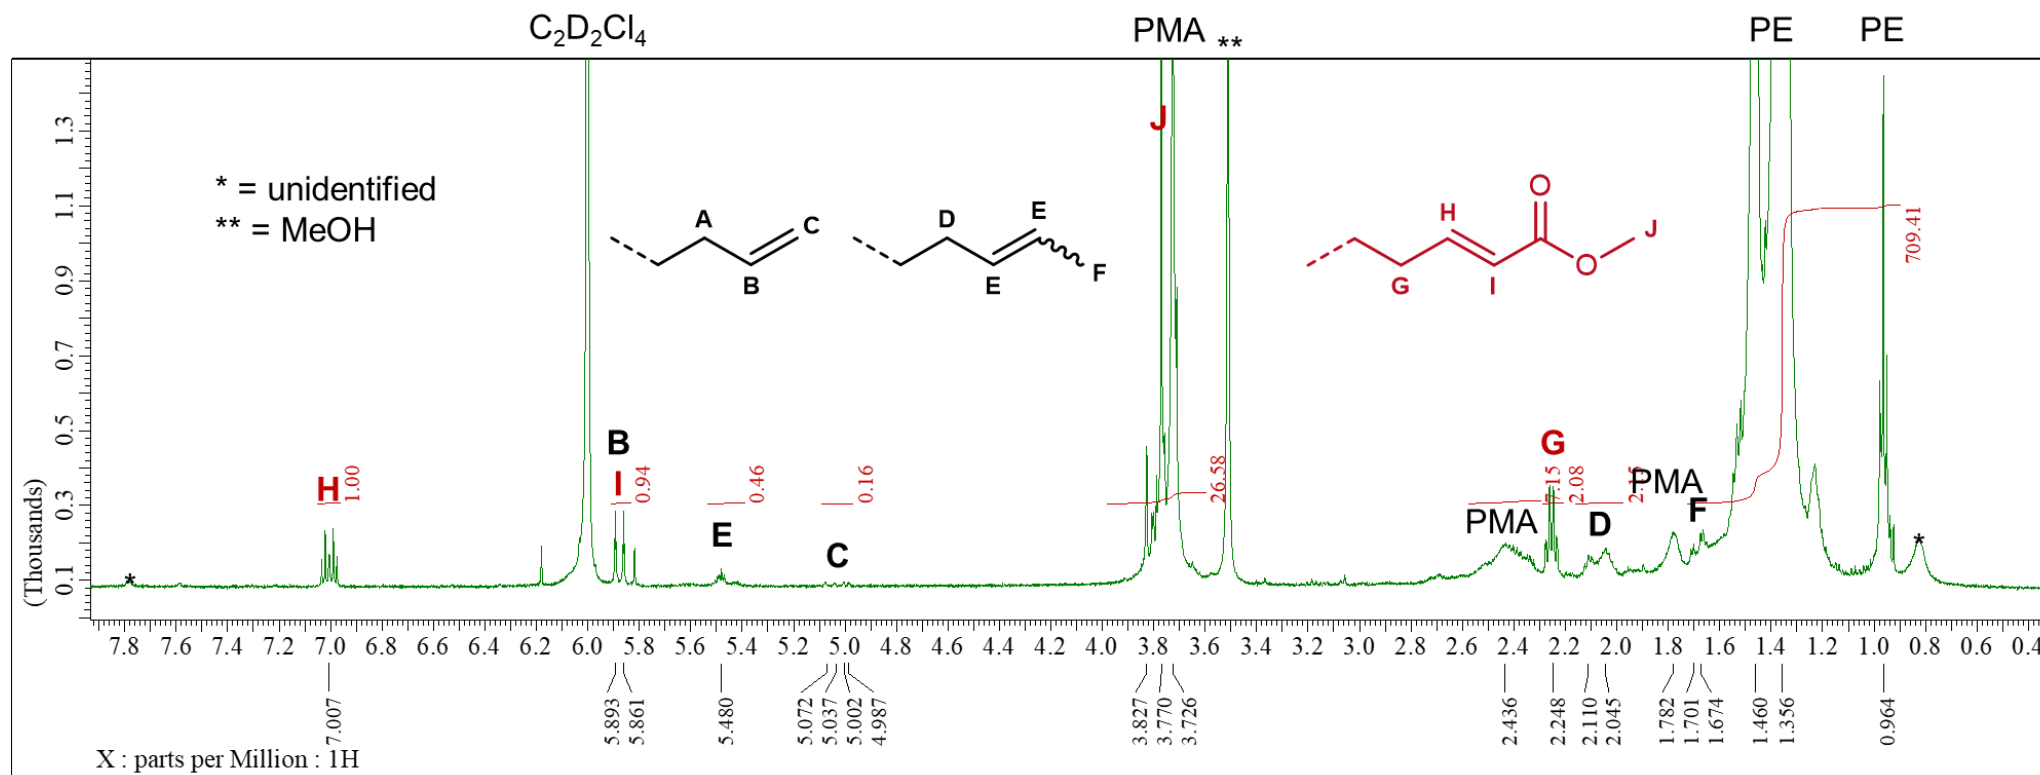

**Figure S22.**  $^1\text{H}$  NMR spectrum of the ethylene / methyl acrylate copolymer obtained in Table 3, entry 8 ( $\text{C}_2\text{D}_2\text{Cl}_4$ ,  $120^\circ\text{C}$ , relaxation delay 5 s). Peak assignments were based on the literatures.<sup>8-9</sup>

Note: Calculation of terminal  $\alpha,\beta$ -unsaturated ester group content: Assume  $(1-x)$  mol% ethylene and  $x$  mol% terminal  $\alpha,\beta$ -unsaturated ester group in the copolymer,

$$\frac{x}{x+4(1-x)} = \frac{\text{H}}{\text{H}+\text{E}+\text{C}+\text{D}+\text{F}+\text{PE}} \quad x = \frac{4 \times \text{H} \times 100}{(4 \times \text{H}) + \text{E} + \text{C} + \text{D} + \text{F} + \text{PE}}$$

Therefore, the terminal  $\alpha,\beta$ -unsaturated ester group content is calculated as follows:  $(4 \times 1.00 \times 100) / \{(4 \times 1.00) + 0.46 + 0.16 + 2.15 + 709.41\} = 0.56 \text{ mol\%}$

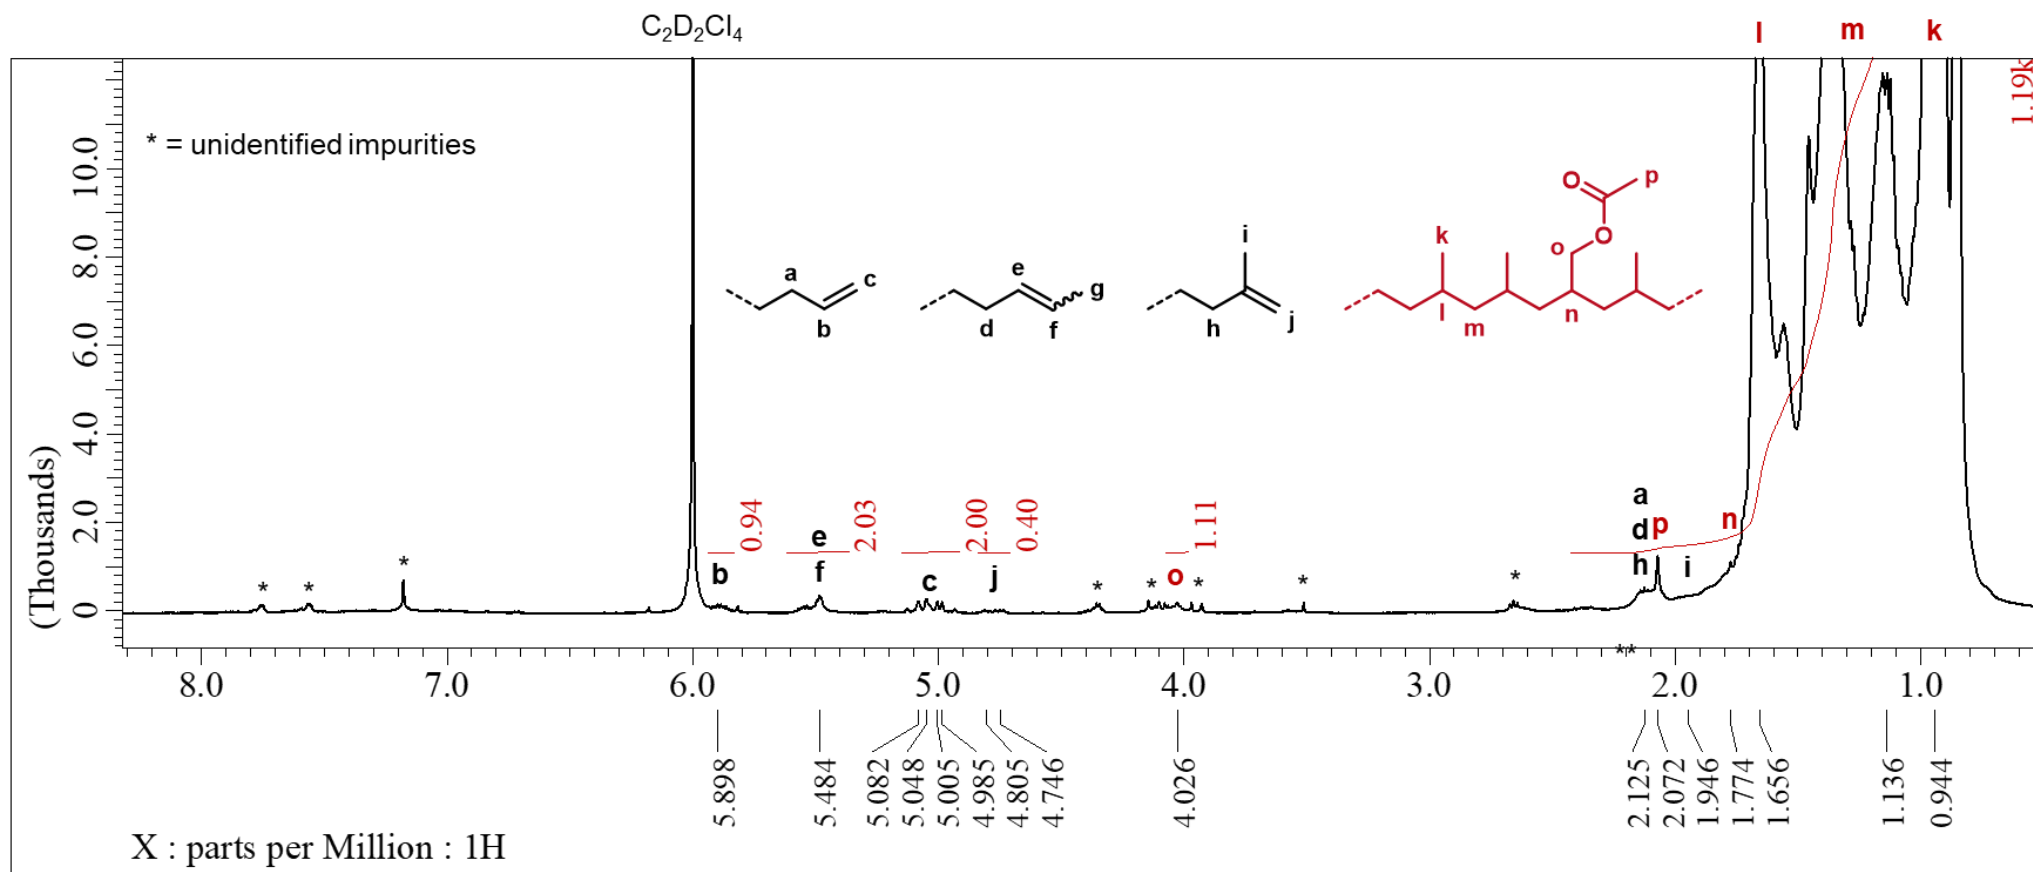

**Figure S23.**  $^1H$  NMR spectrum of the propylene / allyl acetate copolymer obtained in Table 3, entry 9 ( $C_2D_2Cl_4$ , 120  $^{\circ}C$ , relaxation delay 5 s).

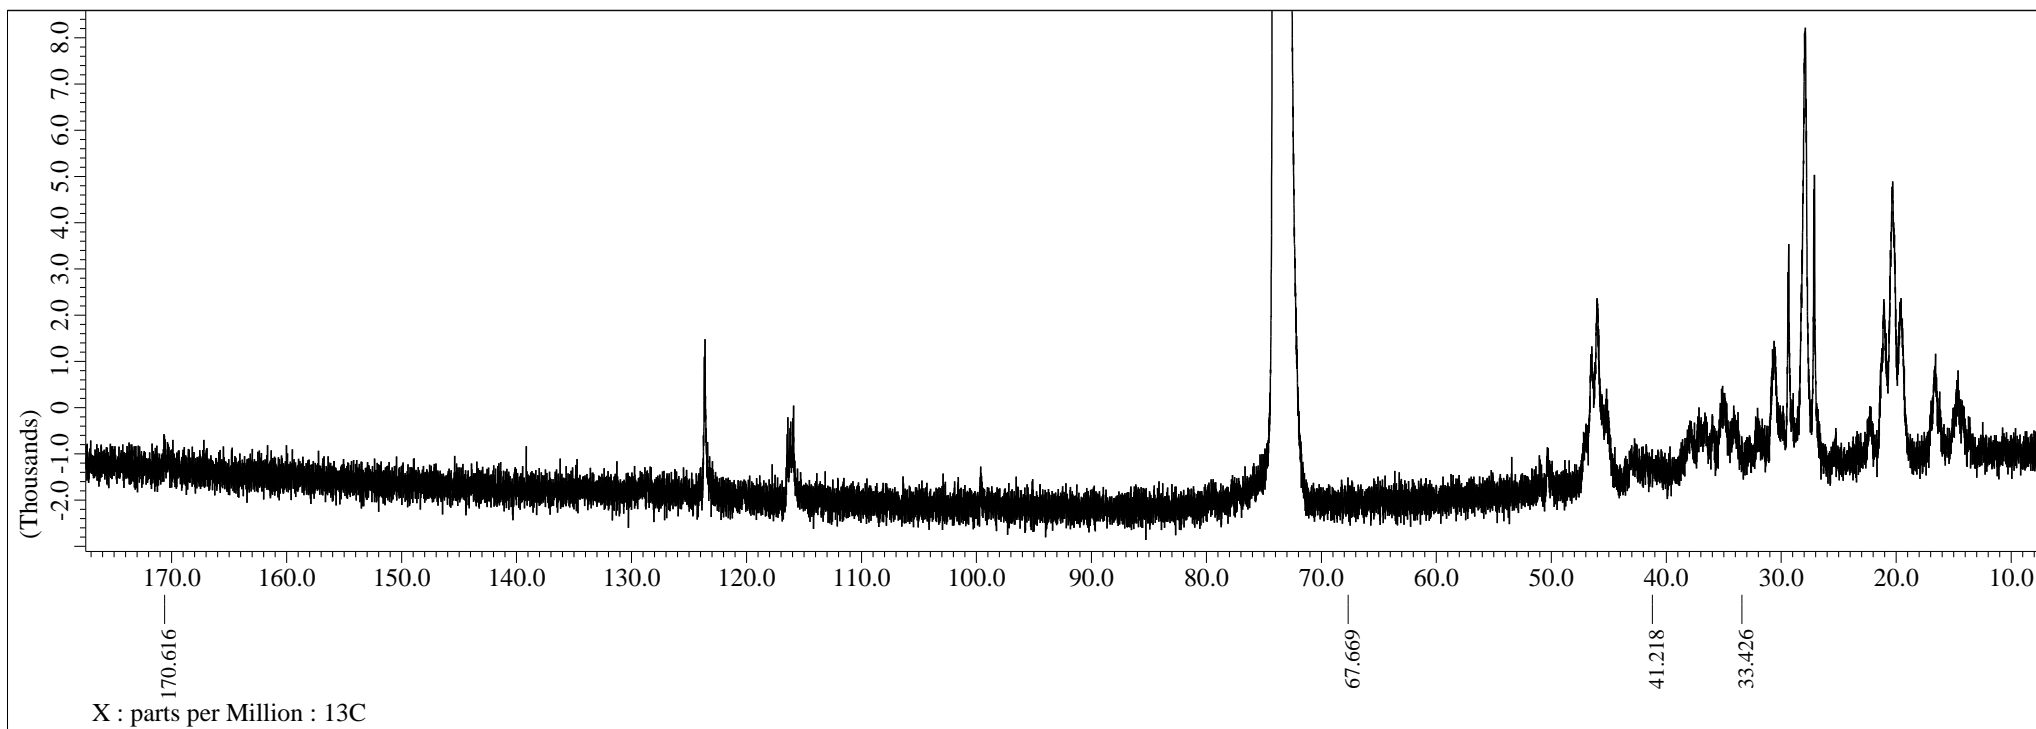

**Figure S24.** Quantitative  $^{13}\text{C}$  NMR spectrum of the propylene / allyl acetate copolymer obtained in Table 3, entry 9 ( $\text{C}_2\text{D}_2\text{Cl}_4$ , 120  $^\circ\text{C}$ ).

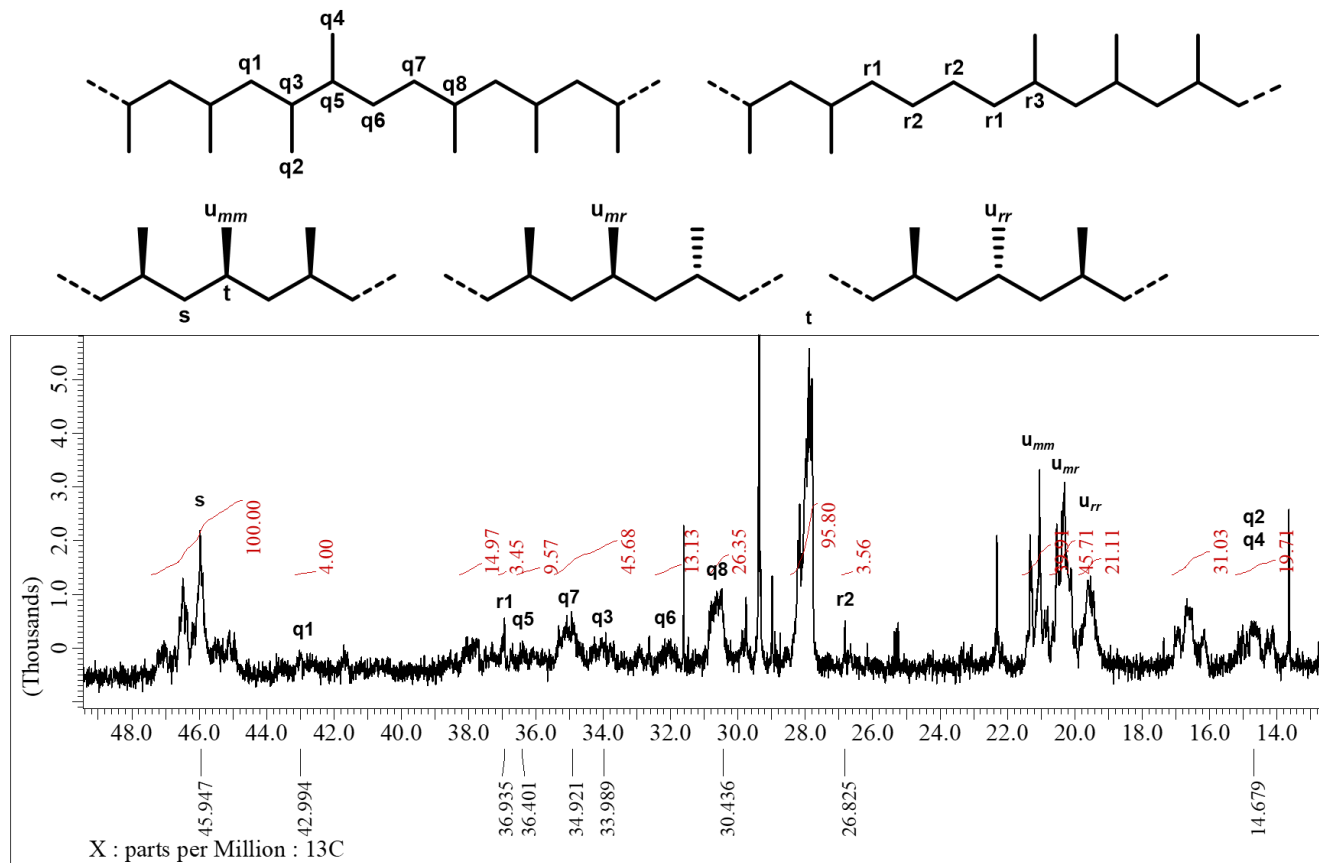

**Figure S25.** Amplified quantitative  $^{13}\text{C}$  NMR spectrum from Figure S24.

Note: Calculation of regiodefect (mol%)

$$x = \frac{[(q2+q4)/2] + (r2/2)}{\text{all carbons}/3} \times 100$$

Therefore, the regiodefect is calculated as follows:  $[\{(19.71/2) + (3.56/2)\} / \{(100 + 4 + 14.97 + 3.45 + 9.57 + 45.68 + 13.13 + 26.35 + 95.80 + 3.56 + 39.91 + 45.71 + 21.11 + 31.03 + 19.71)/3\}]$

= 7.36 mol%. Among them, 1,2-/2,1-regiodefect (q1–q8) is estimated to be *ca.* 5.91 mol% while 1,3-enchainment (r1–r3) is estimated to be *ca.* 0.28 mol%

There are some other unidentified signals possibly from other defects structures. On the other hand, the triad abundances were determined by integral values of **u<sub>mm</sub>**, **u<sub>mr</sub>**, **u<sub>rr</sub>**.

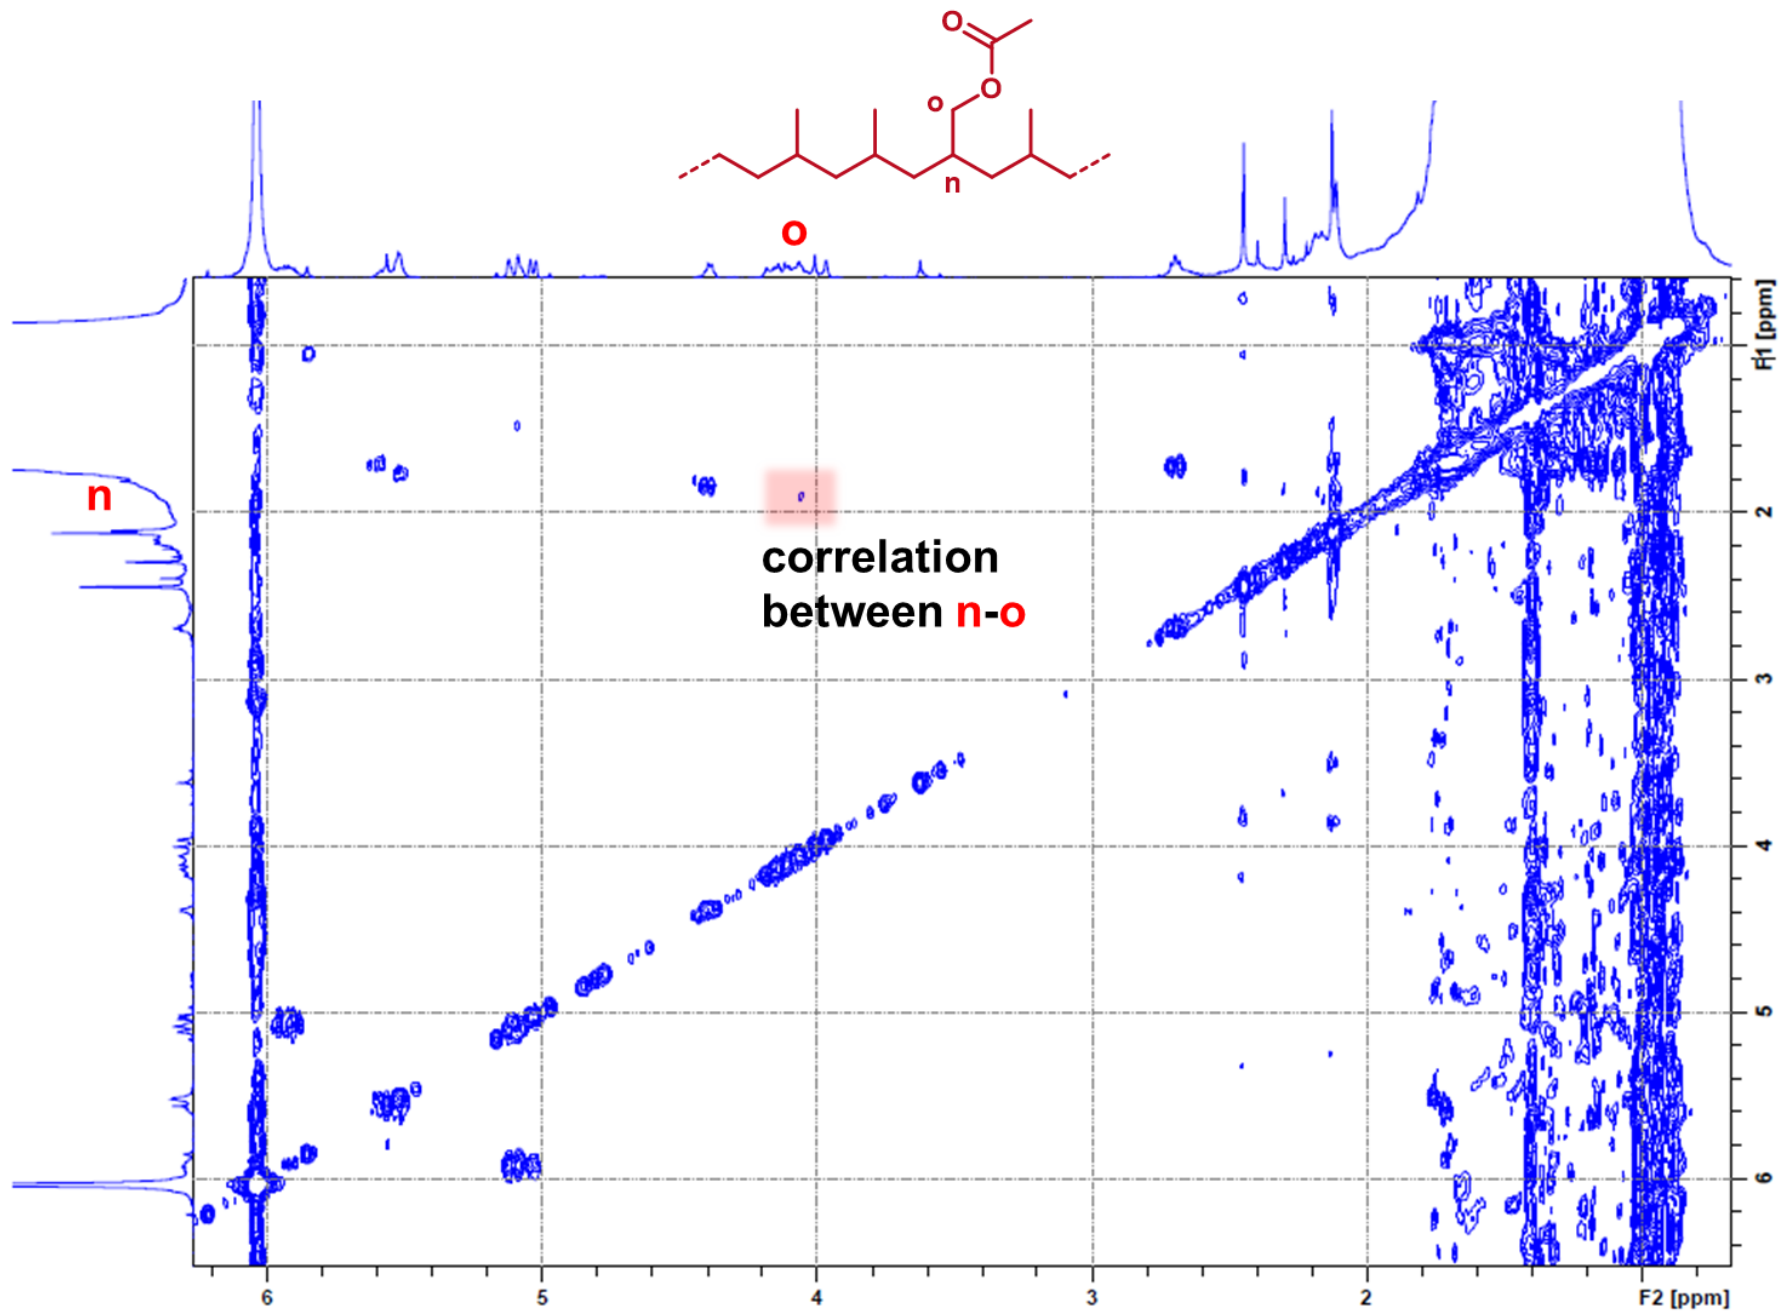

**Figure S26.**  $^1\text{H}$ - $^1\text{H}$  COSY spectrum of the propylene / allyl acetate copolymer obtained in Table 3, entry 9 ( $\text{C}_2\text{D}_2\text{Cl}_4$ , 120 °C).

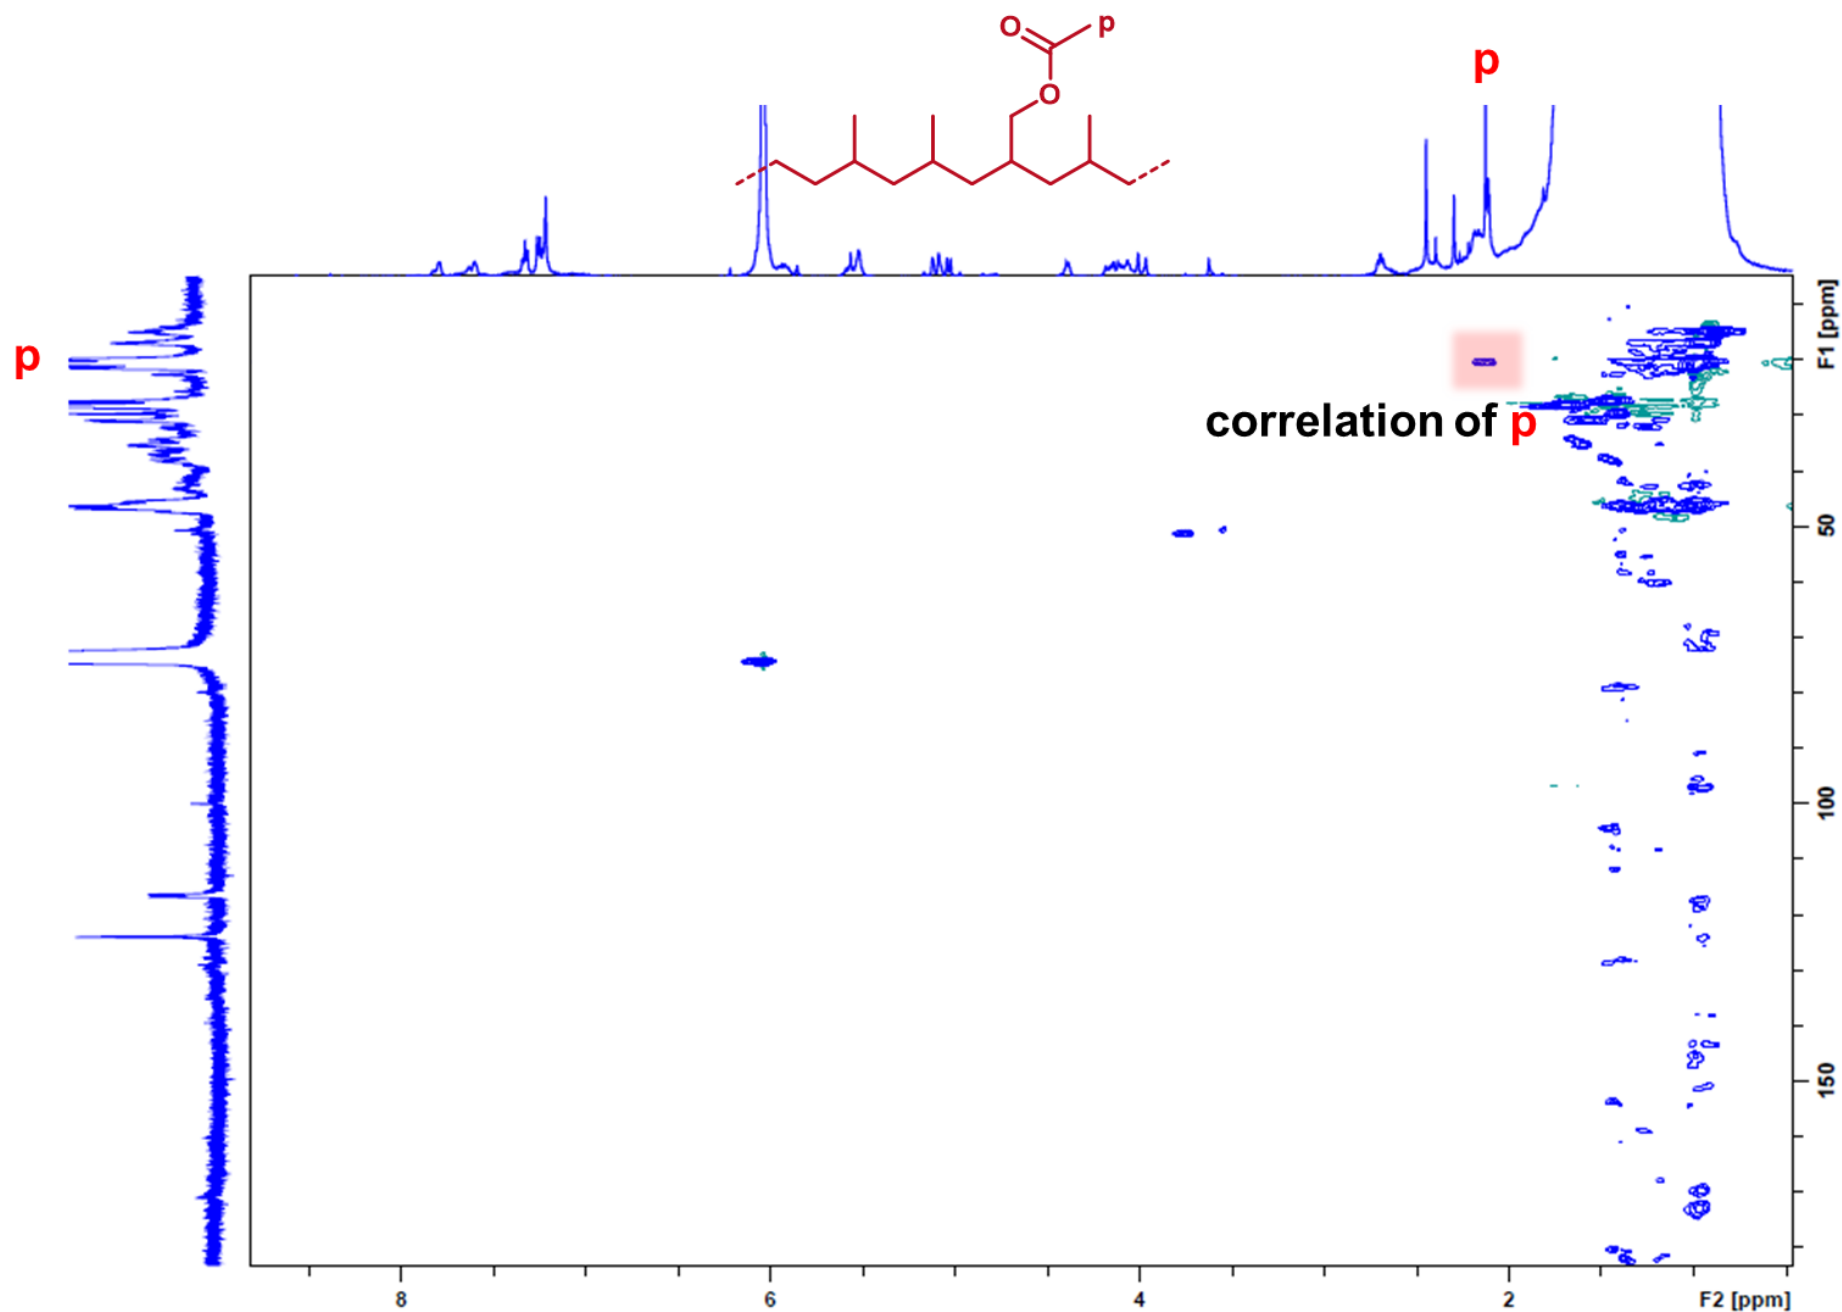

**Figure S27.**  $^1\text{H}$ - $^{13}\text{C}$  HSQC spectrum of the propylene / allyl acetate copolymer obtained in Table 3, entry 9 ( $\text{C}_2\text{D}_2\text{Cl}_4$ , 120 °C).

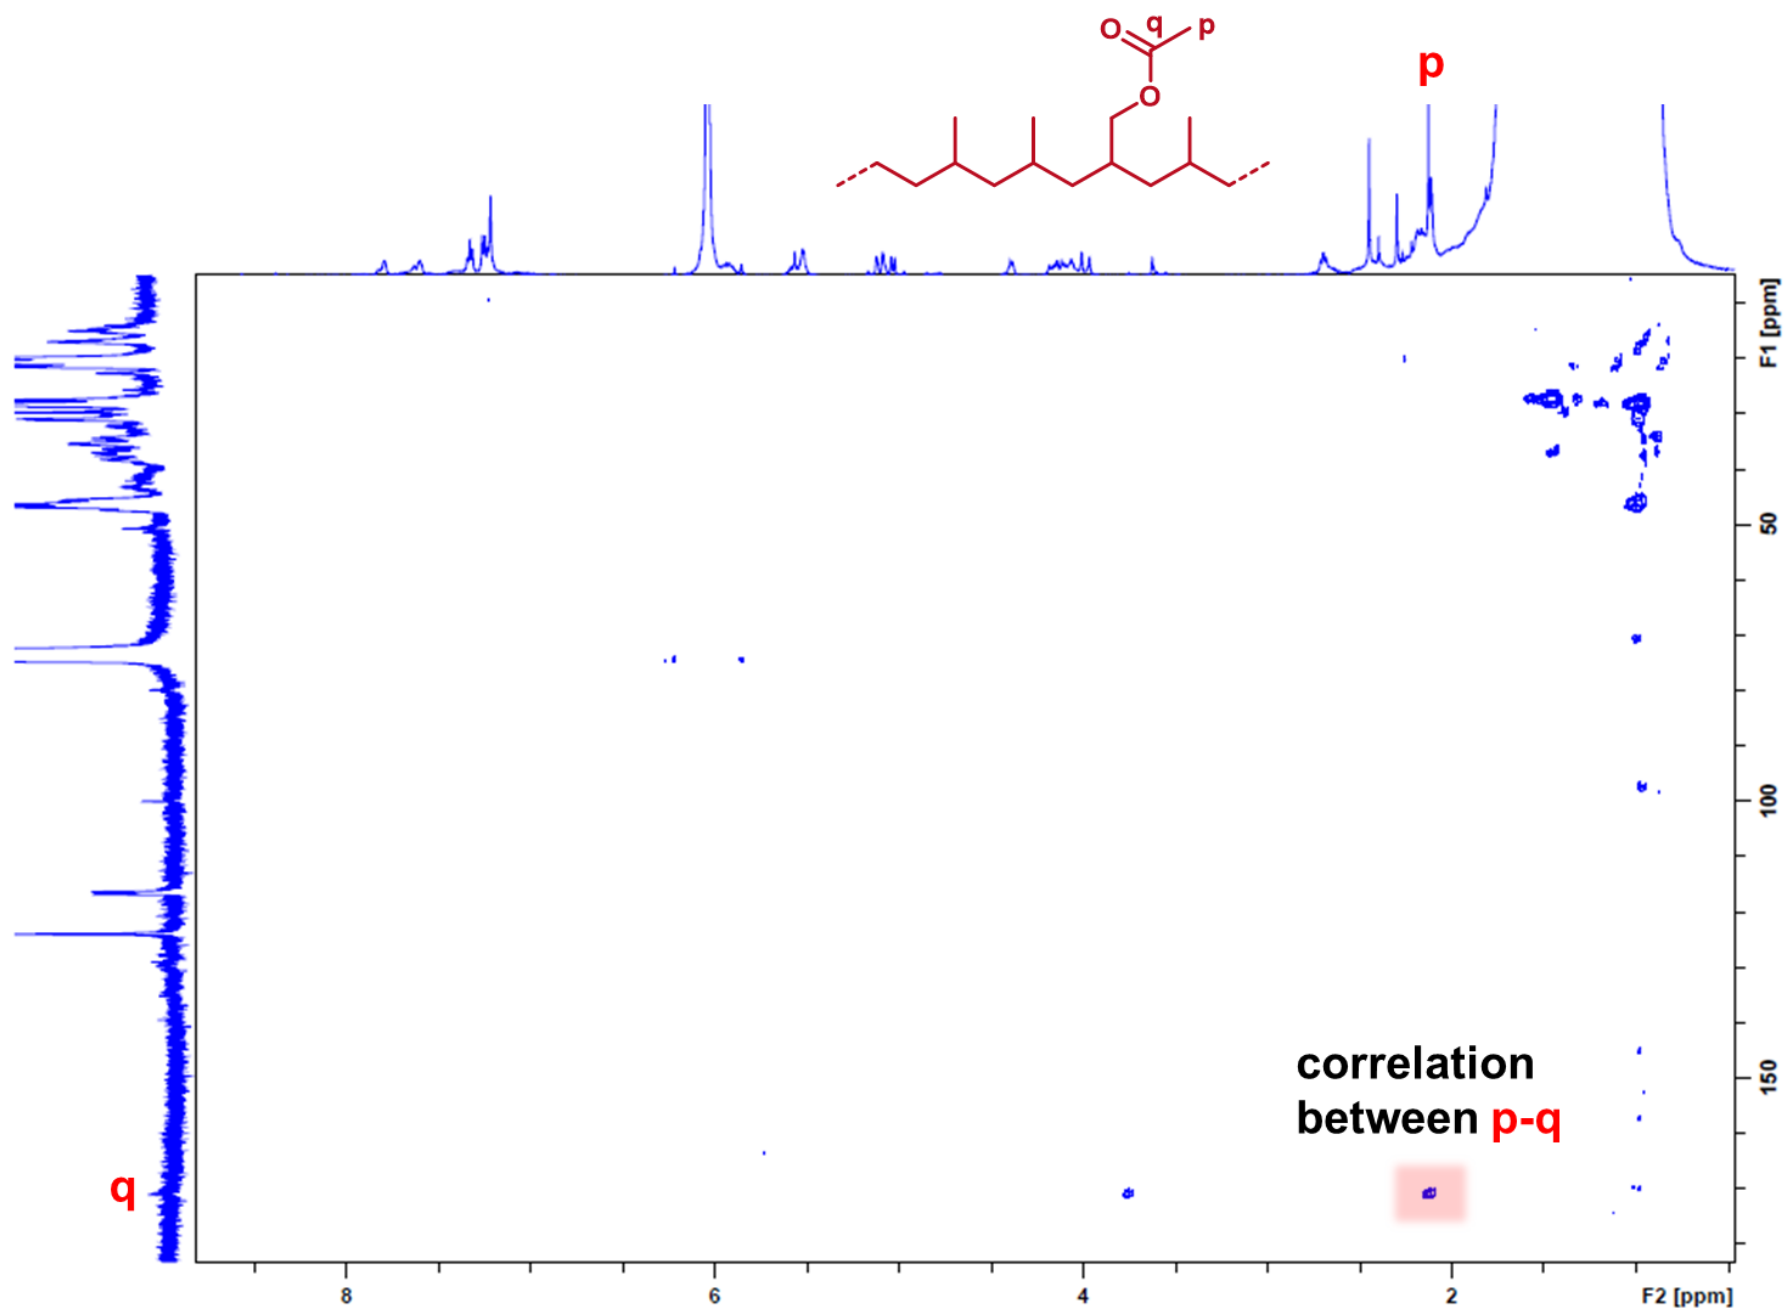

**Figure S28.**  $^1\text{H}$ - $^{13}\text{C}$  HMBC spectrum of the propylene / allyl acetate copolymer obtained in Table 3, entry 9 ( $\text{C}_2\text{D}_2\text{Cl}_4$ , 120  $^\circ\text{C}$ ).

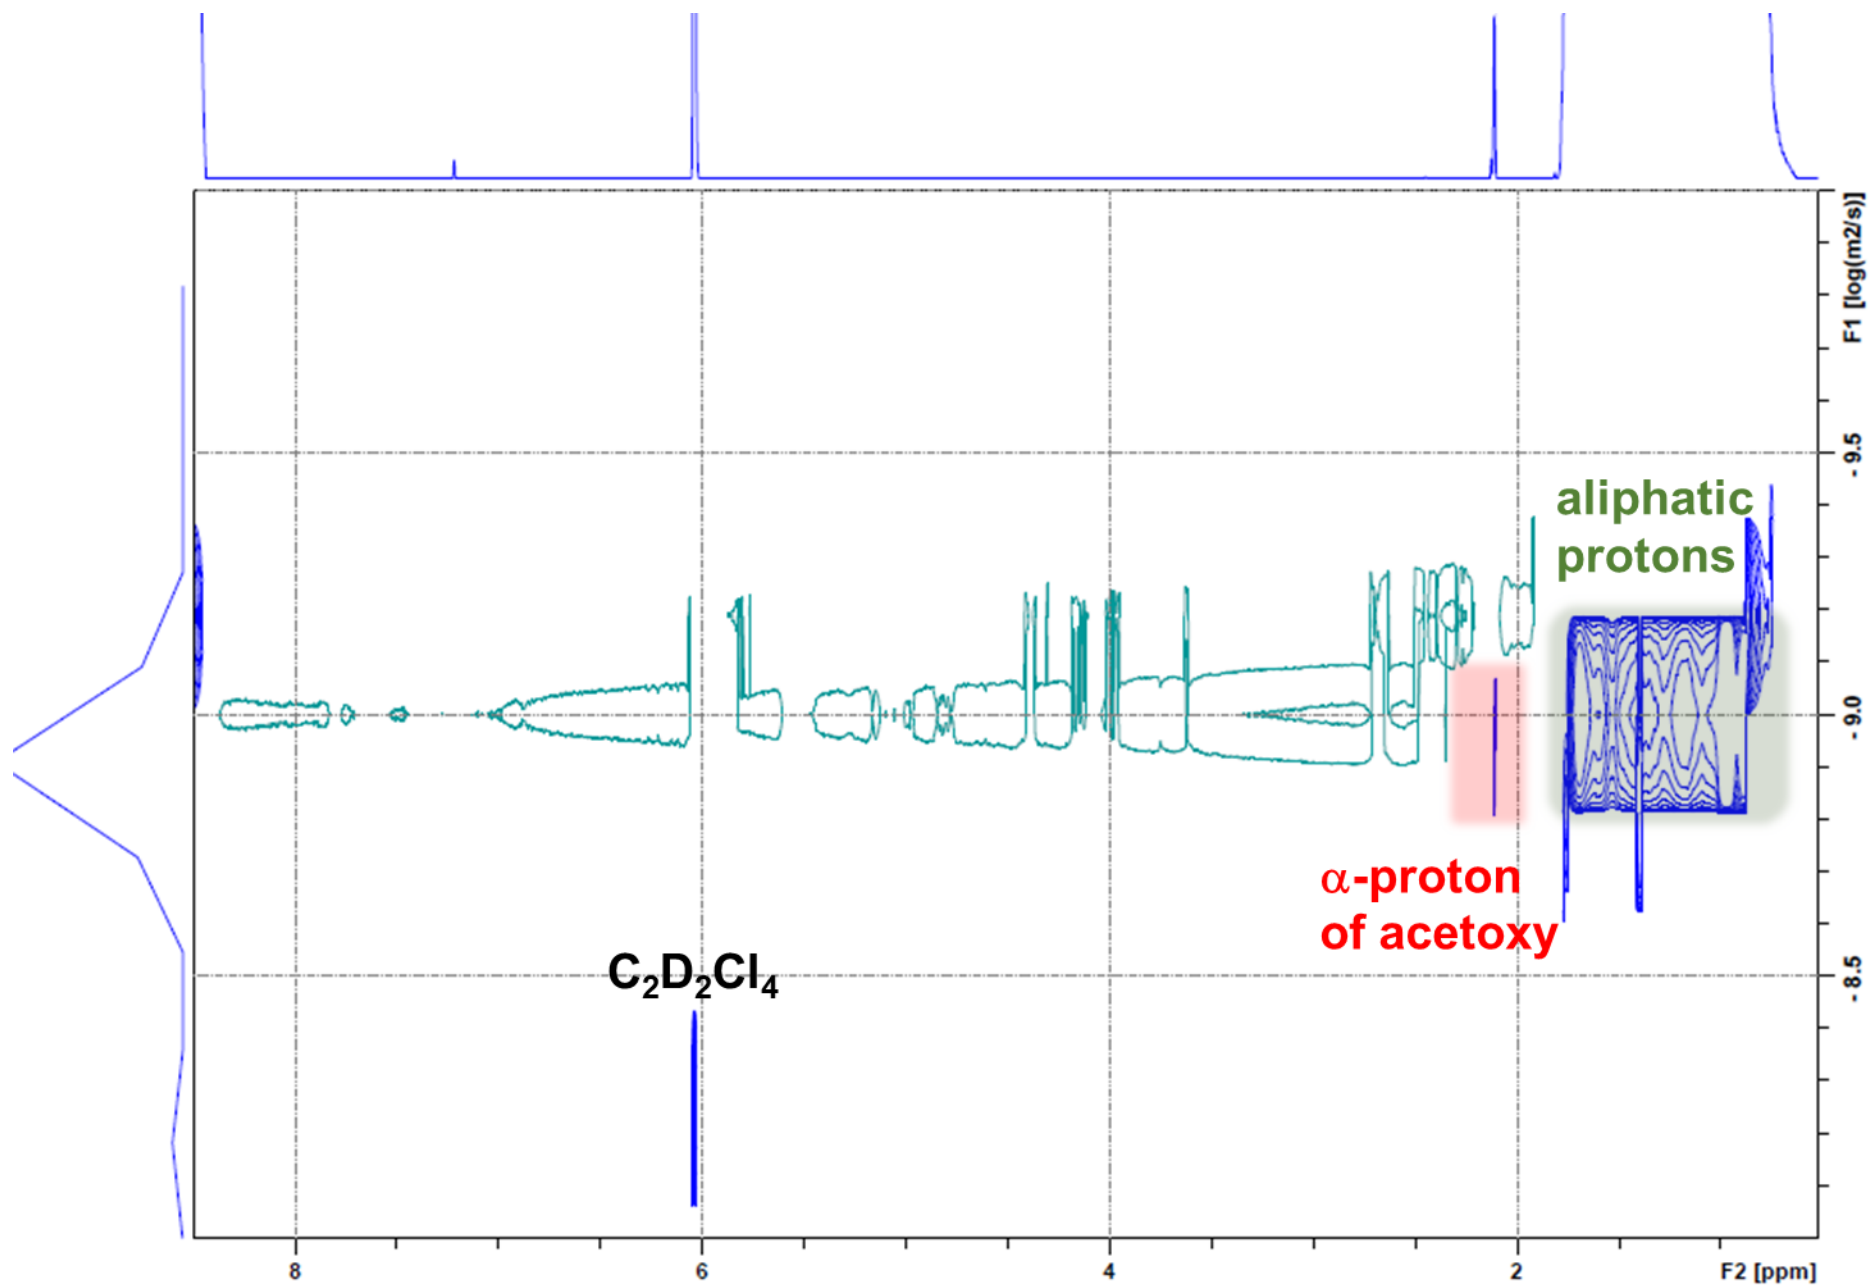

**Figure S29.** DOSY spectrum of the propylene / allyl acetate copolymer obtained in Table 3, entry 9 ( $C_2D_2Cl_4$ , 120 °C).



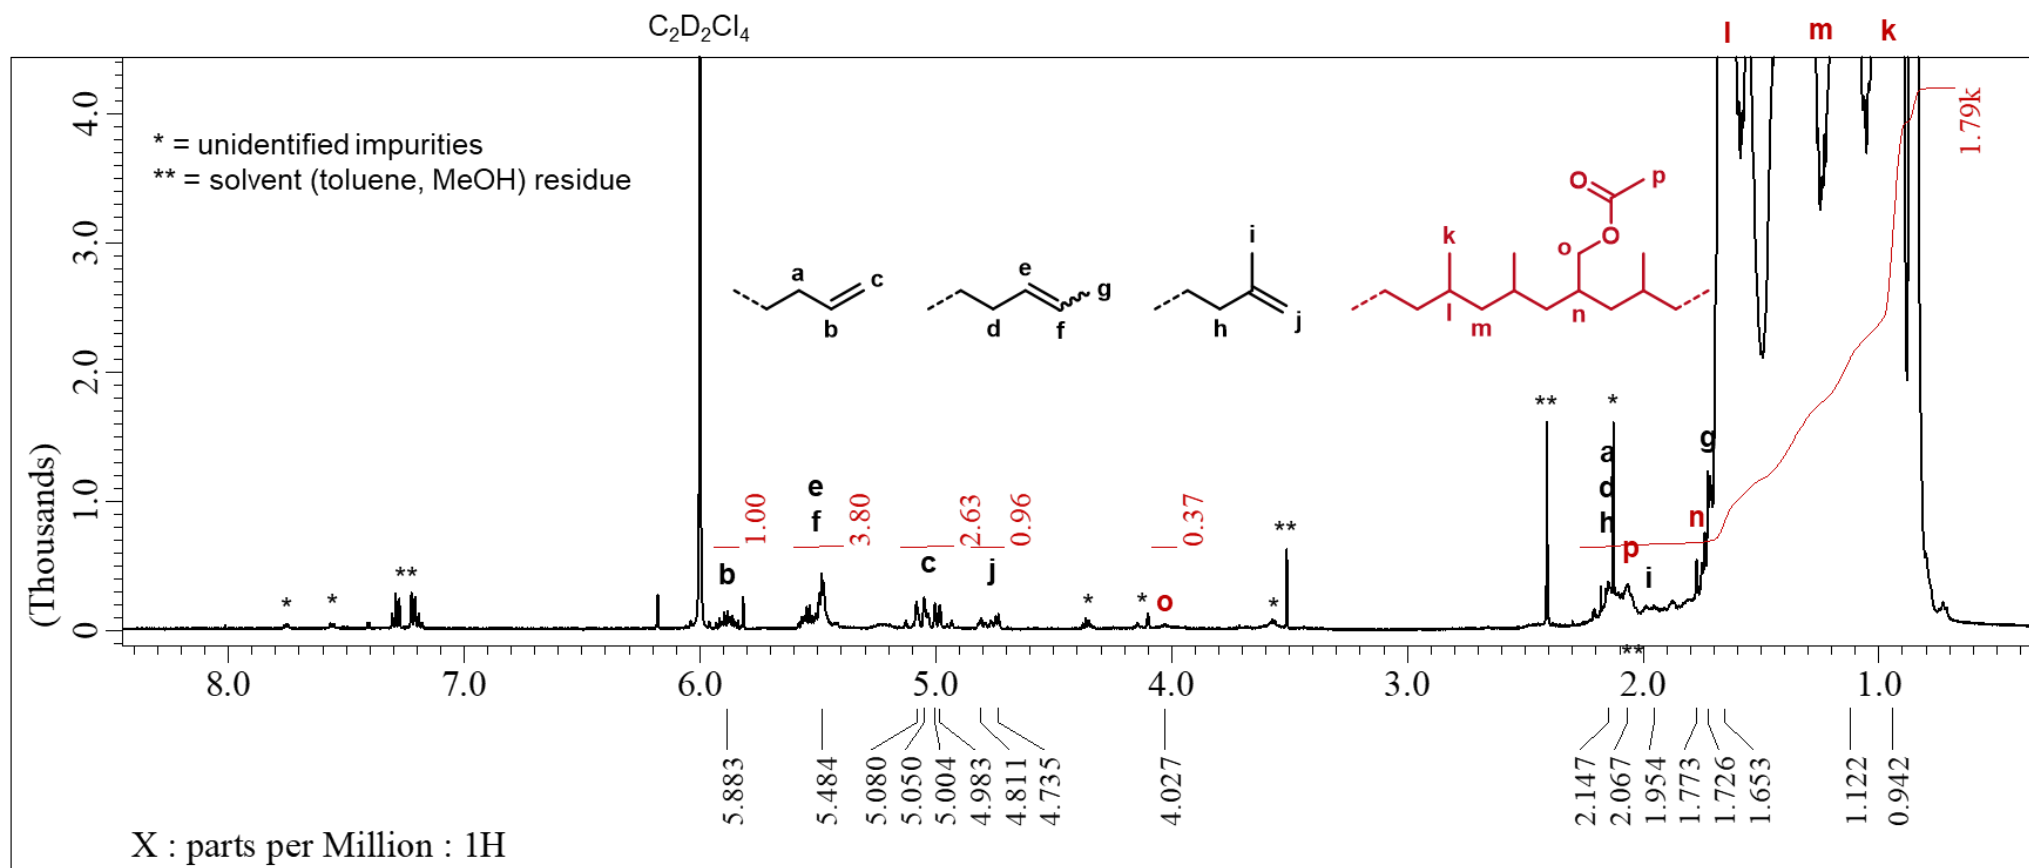

**Figure S30.**  $^1H$  NMR spectrum of the propylene / allyl acetate copolymer obtained in Table 3, entry 10 ( $C_2D_2Cl_4$ , 120  $^{\circ}C$ , relaxation delay 5 s).

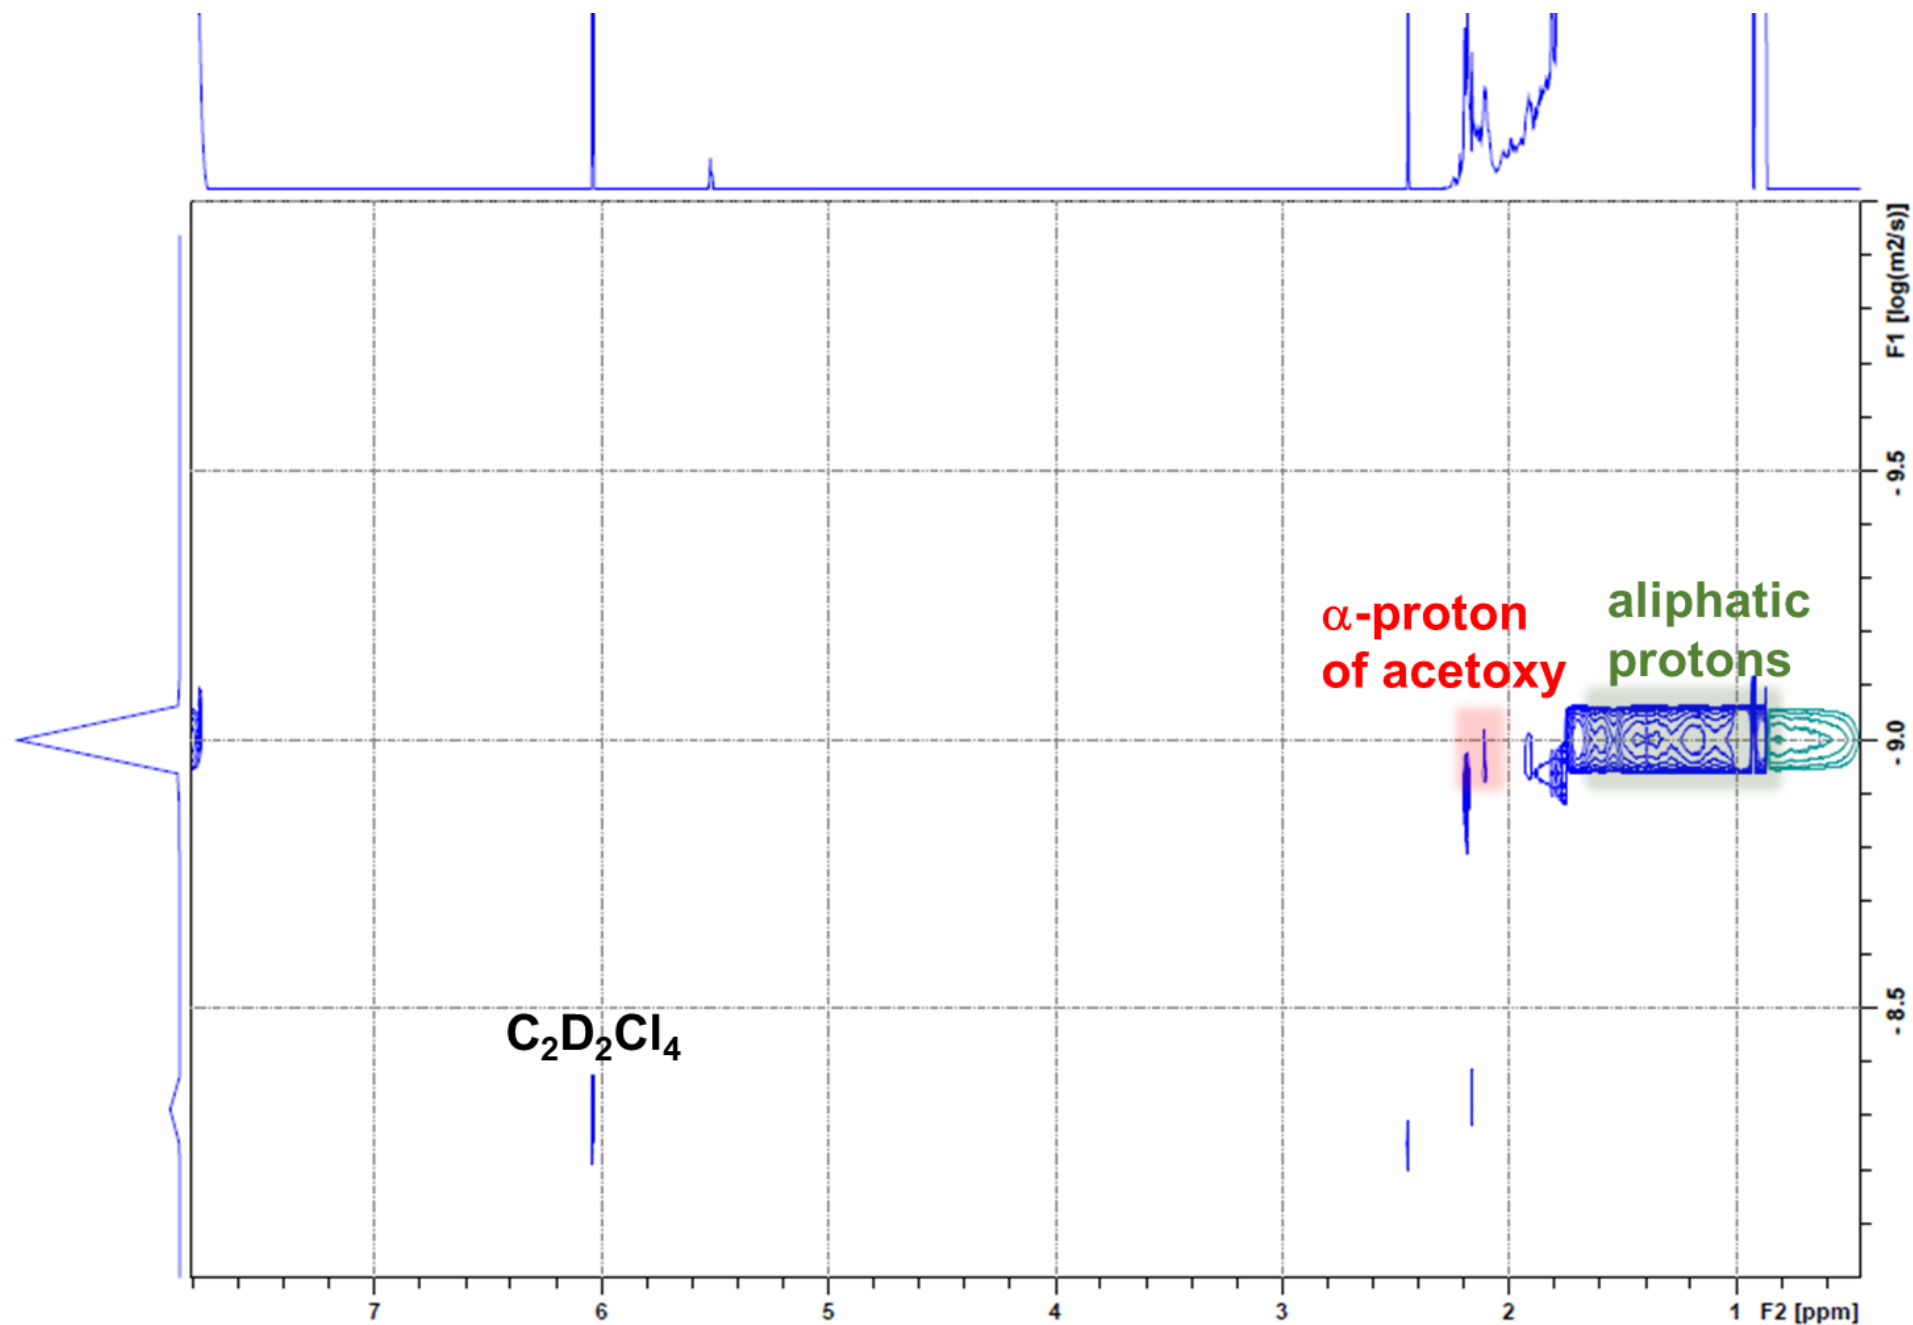

**Figure S31.** DOSY spectrum of the propylene / allyl acetate copolymer obtained in Table 3, entry 10 ( $C_2D_2Cl_4$ , 120 °C, relaxation delay 5 s).

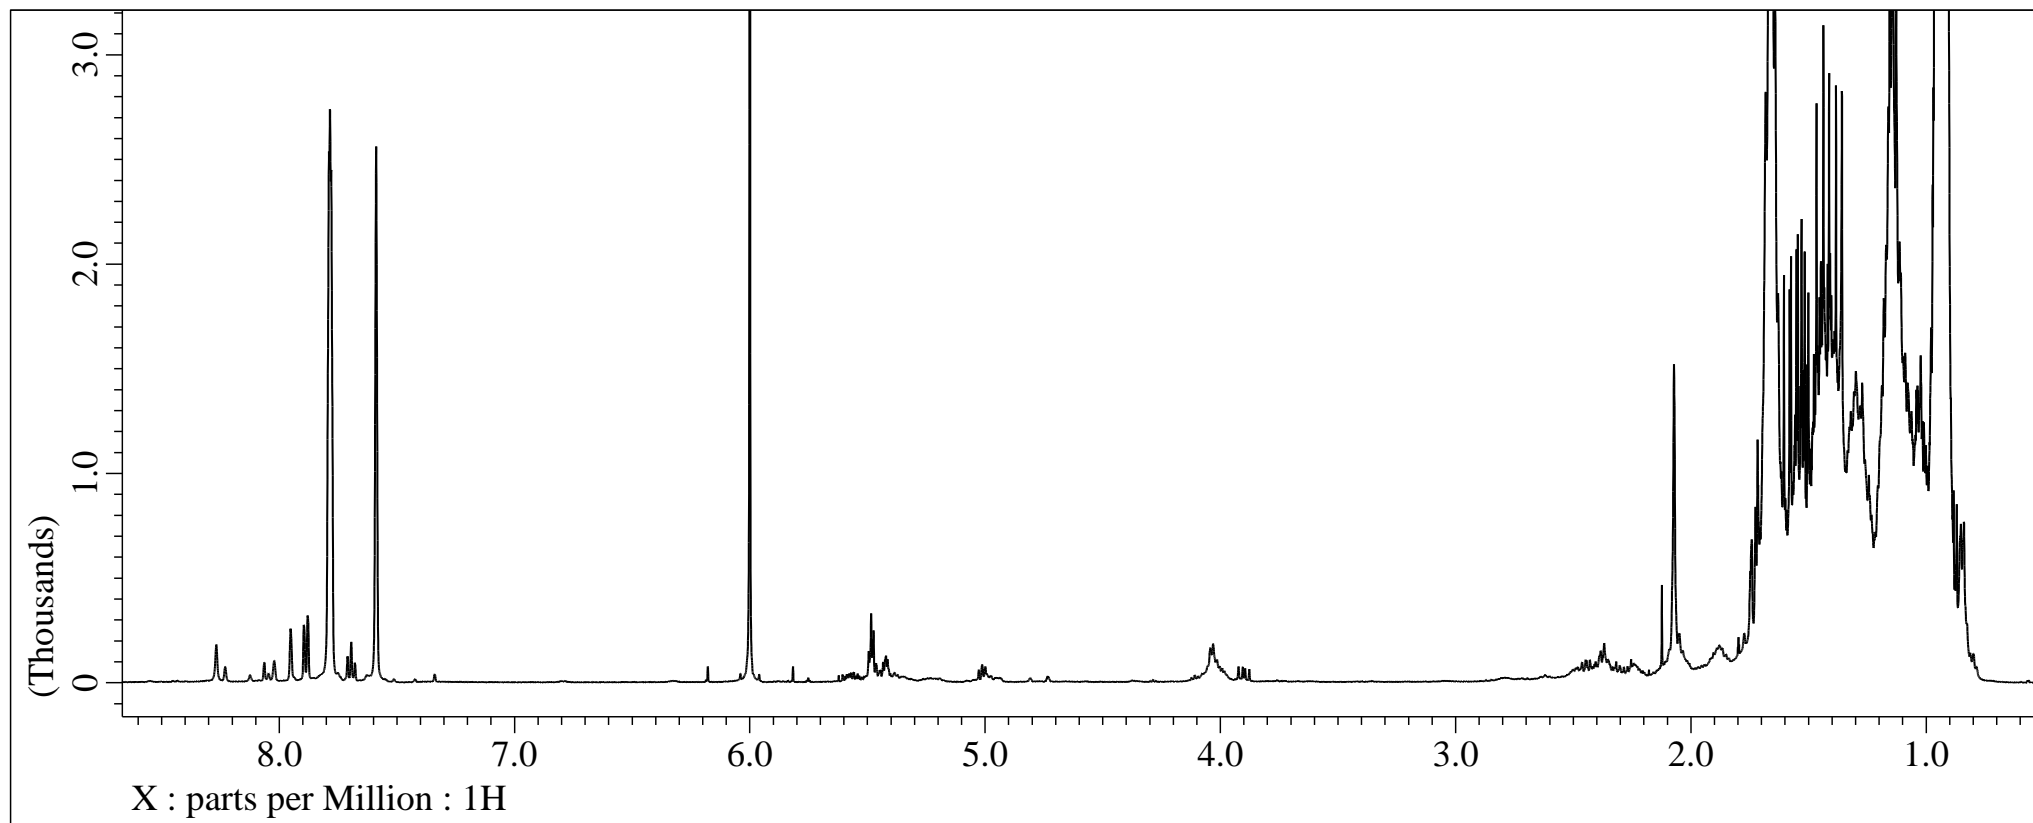

**Figure S32.**  $^1\text{H}$  NMR spectrum of the propylene / allyl acetate copolymer obtained in Table S1, entry 1 ( $\text{C}_2\text{D}_2\text{Cl}_4$ , 120  $^\circ\text{C}$ , relaxation delay 5 s).

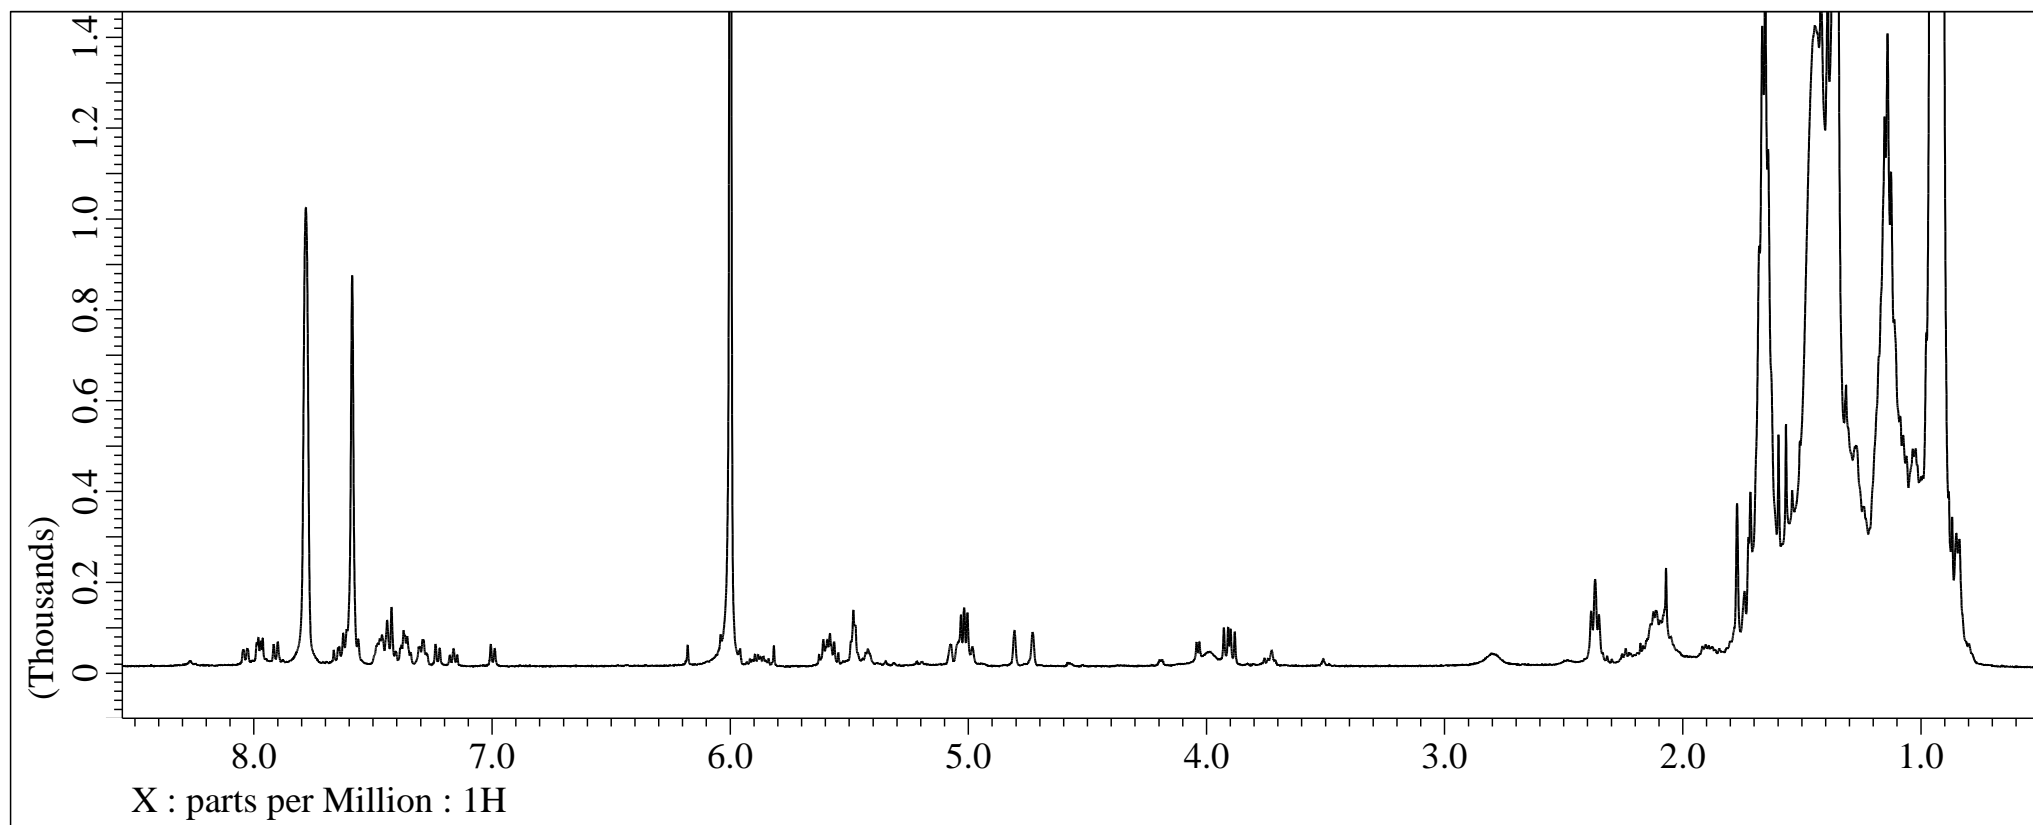

**Figure S33.**  $^1\text{H}$  NMR spectrum of the propylene / allyl acetate copolymer obtained in Table S1, entry 2 ( $\text{C}_2\text{D}_2\text{Cl}_4$ , 120  $^\circ\text{C}$ , relaxation delay 5 s).

### 3. SEC Traces

#### Chromatography Report

|                 |                   |                              |                              |
|-----------------|-------------------|------------------------------|------------------------------|
| Title           |                   | Measurement Date & Time      | 2020/03/03 17:20:46          |
| Sample Name     | 09-018-A55PE      | Calculation Date & Time      | 2020/03/03 18:30:33          |
| Database Name   | 2020-03-03.chd    | Acquisition Time [min] [min] | 10.000 – 30.000              |
| Saved File Name | RSLT0597          | Sampling Pitch [ms] [ms]     | 100                          |
| Method Data     | meth8509_standard | Vial Number                  | 11                           |
| Calc. Channel   | RI EXT            | Calculation Method           | Molecular Weight Column test |

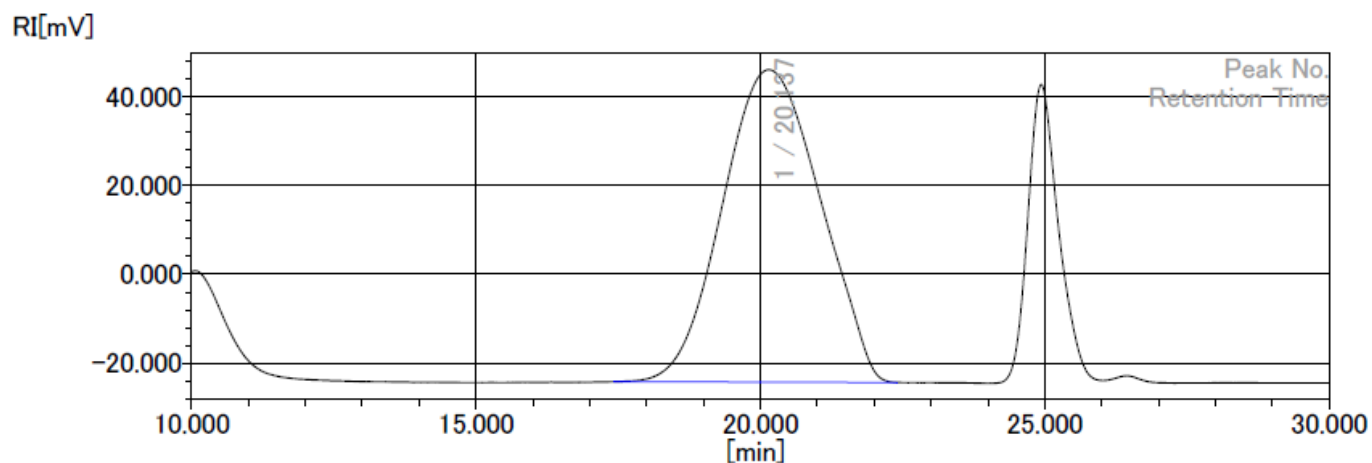

#### Result of Calculation (RI) (RI)

##### Peak 1 Base Peak

|             | [min]  | [mV]    | [mol]      | Mn      | 3,772  |
|-------------|--------|---------|------------|---------|--------|
| Peak Start  | 17.423 | -24.179 | 114,599    | Mw      | 9,399  |
| Peak Top    | 20.137 | 46.184  | 7,438      | Mz      | 17,462 |
| Peak End    | 22.390 | -24.395 | 157        | Mz+1    | 26,857 |
|             |        |         |            | Mv      | 9,399  |
| Height [mV] |        |         | 70.481     | Mp      | 8,824  |
| Area [mV*s] |        |         | 8398.050   | Mz/Mw   | 1.858  |
| Area% [%]   |        |         | 100.000    | Mw/Mn   | 2.492  |
| [eta]       |        |         | 9399.39415 | Mz+1/Mw | 2.857  |

**Figure S34.** SEC trace of the polyethylene obtained in Table 1, entry 1 (1,2-dichlorobenzene, 145 °C)

# Chromatography Report

|                 |                   |                        |                              |
|-----------------|-------------------|------------------------|------------------------------|
| Title           |                   | Measurement Date       | 2018/10/17 17:05:55          |
| Sample Name     | 133-03-116        | Calculation Date       | 2018/10/17 18:01:07          |
| Database Name   | 2018-10-17.chd    | Measurement Time [min] | 10.000 - 30.000              |
| Saved File Name | RSLT0332          | Sampling Pitch [ms]    | 100                          |
| Method Data     | meth8509_standard | Cup Number             | 4                            |
| Calc. Channel   | RI EXT            | Calculation Method     | Molecular Weight Column test |

RI[mV]

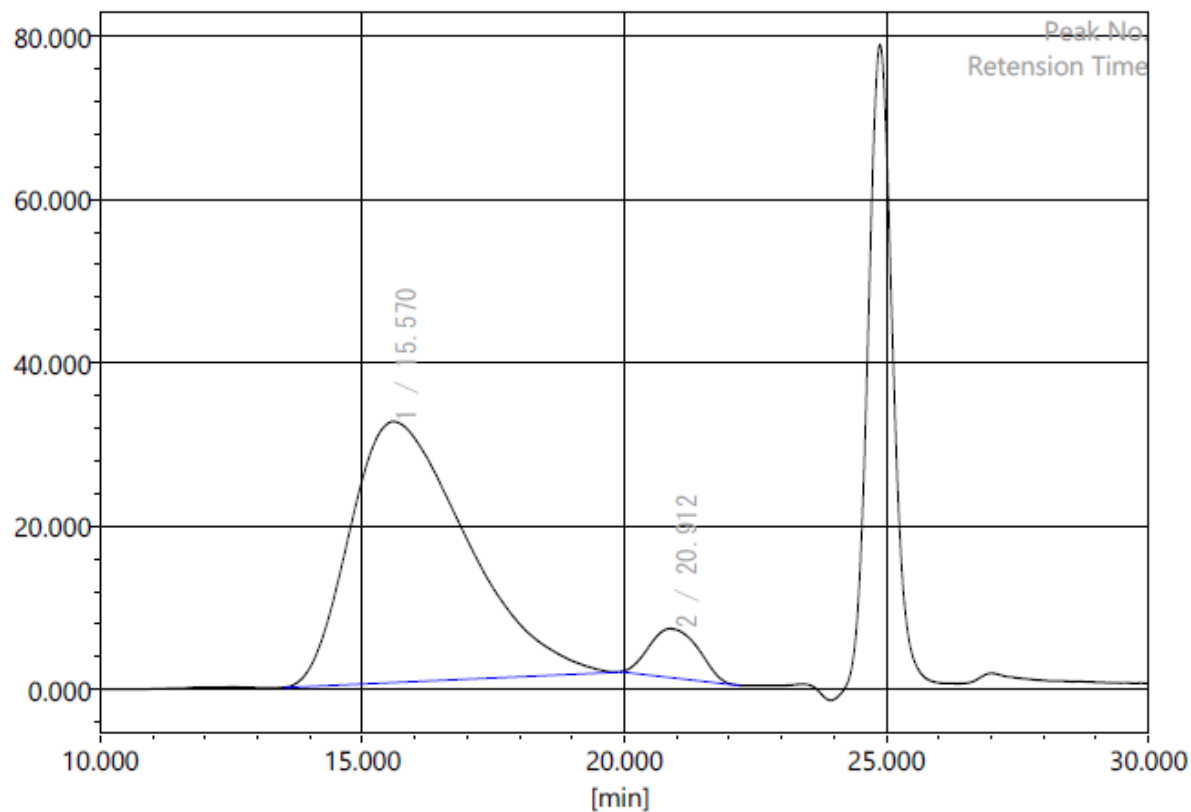

## Result of Calculation (RI)

Peak No. 1 Base Peak

|             | [min]  | [mV]   | [mol]        | Mn      | 227,255   |
|-------------|--------|--------|--------------|---------|-----------|
| Peak Start  | 13.530 | 0.239  | 3,540,928    | Mw      | 558,635   |
| Peak Top    | 15.570 | 32.830 | 601,437      | Mz      | 938,928   |
| Peak End    | 19.853 | 2.104  | 10,415       | Mz+1    | 1,285,245 |
|             |        |        |              | Mv      | 558,635   |
| Height [mV] |        |        | 31.989       | Mp      | 601,438   |
| Area [mV*s] |        |        | 4944.986     | Mz/Mw   | 1.681     |
| Area% [%]   |        |        | 92.593       | Mw/Mn   | 2.458     |
| [eta]       |        |        | 558635.26300 | Mz+1/Mw | 2.301     |

**Figure S35.** SEC trace of the polyethylene obtained in Table 1, entry 2 (1,2-dichlorobenzene, 145 °C)

# High-temperature GPC Report

|                 |                   |                        |                              |
|-----------------|-------------------|------------------------|------------------------------|
| Title           |                   | Measurement Date       | 2018/10/22 18:10:32          |
| Sample Name     | 133-03-121        | Calculation Date       | 2018/10/22 18:26:13          |
| Database Name   | 2018-10-22.chd    | Measurement Time [min] | 10.000 - 30.000              |
| Saved File Name | RSLT0334          | Sampling Pitch [ms]    | 100                          |
| Method Data     | meth8509_standard | Cup Number             | 2                            |
| Calc. Channel   | RI EXT            | Calculation Method     | Molecular Weight Column test |

RI[mV]

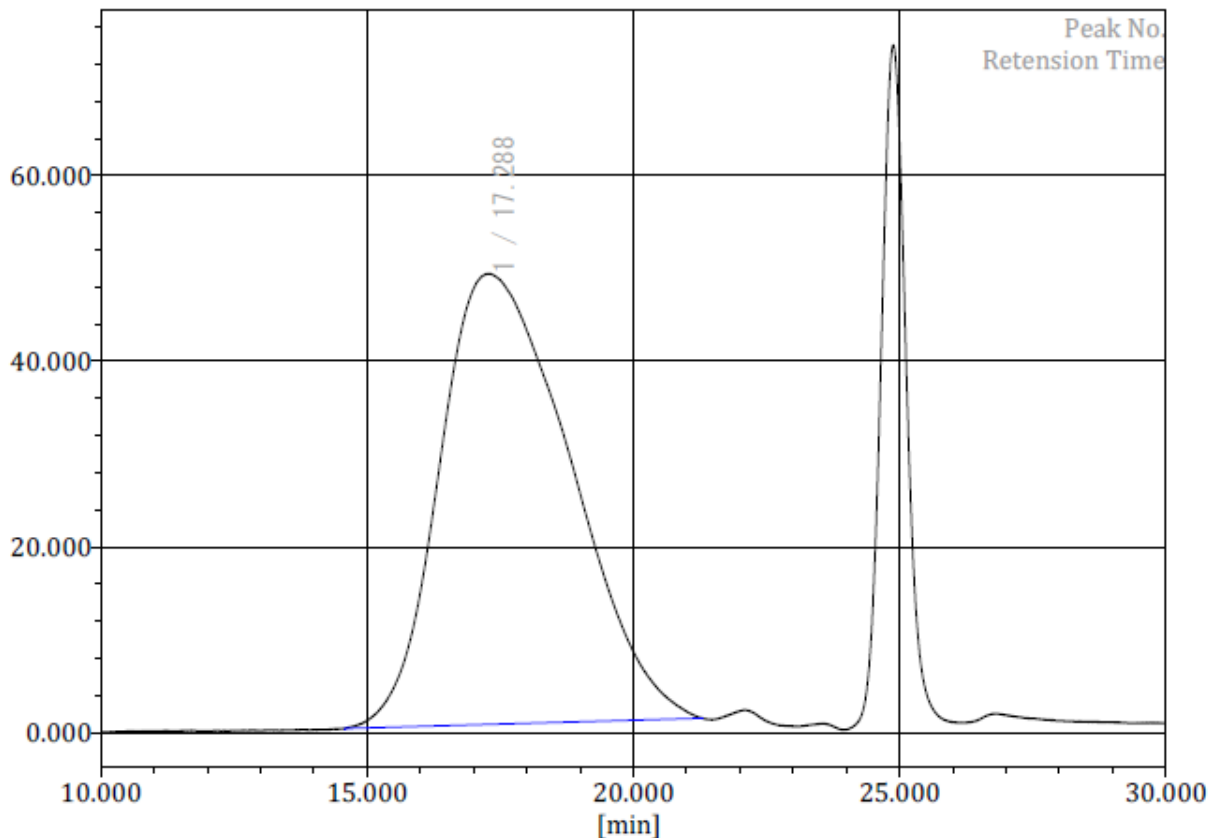

## Calculation Results (RI)

Peak No. 1 Base Peak

|             | [min]  | [mV]   | [mol]        | Mn      | 45,461  |
|-------------|--------|--------|--------------|---------|---------|
| Peak Start  | 14.583 | 0.432  | 1,438,609    | Mw      | 132,657 |
| Peak Top    | 17.288 | 49.457 | 129,440      | Mz      | 258,245 |
| Peak End    | 21.298 | 1.544  | 1,418        | Mz+1    | 406,886 |
|             |        |        |              | Mv      | 132,657 |
| Height [mV] |        |        | 48.577       | Mp      | 132,786 |
| Area [mV*s] |        |        | 8256.070     | Mz/Mw   | 1.947   |
| Area% [%]   |        |        | 100.000      | Mw/Mn   | 2.918   |
| [eta]       |        |        | 132656.70351 | Mz+1/Mw | 3.067   |

**Figure S36.** SEC trace of the polyethylene obtained in Table 1, entry 3 (1,2-dichlorobenzene, 145 °C)

## Chromatography Report

|                 |                   |                              |                              |
|-----------------|-------------------|------------------------------|------------------------------|
| Title           |                   | Measurement Date & Time      | 2020/03/10 18:21:07          |
| Sample Name     | 019-PP50          | Calculation Date & Time      | 2020/03/10 18:56:03          |
| Database Name   | 2020-03-10.chd    | Acquisition Time [min] [min] | 10.000 – 30.000              |
| Saved File Name | RSLT0605          | Sampling Pitch [ms] [ms]     | 100                          |
| Method Data     | meth8509_standard | Vial Number                  | 18                           |
| Calc. Channel   | RI EXT            | Calculation Method           | Molecular Weight Column test |

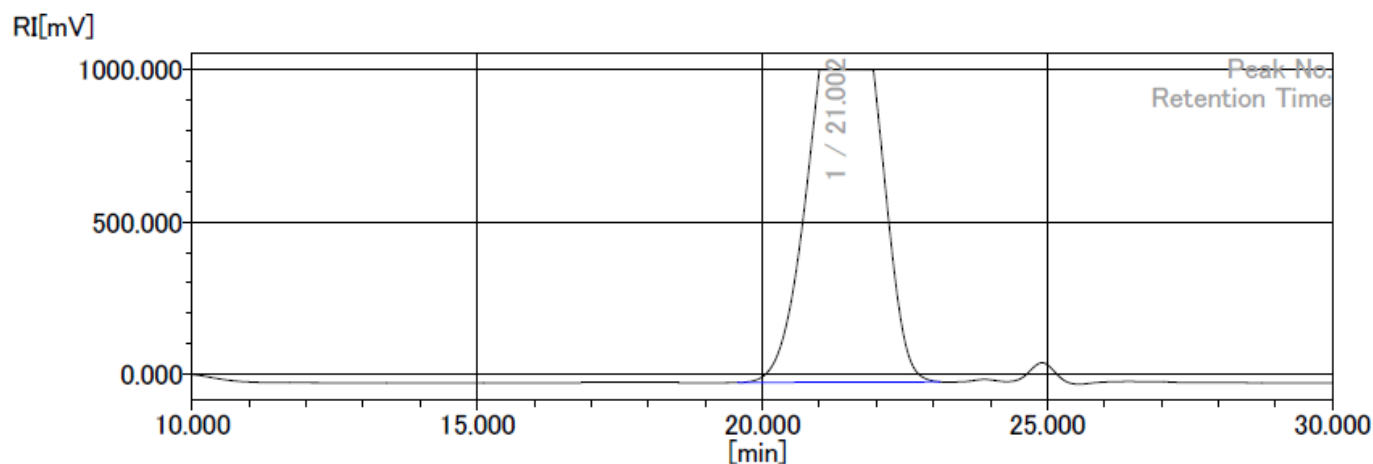

## Result of Calculation (RI) (RI)

Peak 1 Base Peak

|             | [min]  | [mV]     | [mol]      | Mn      | 647   |
|-------------|--------|----------|------------|---------|-------|
| Peak Start  | 19.587 | -26.976  | 14.057     | Mw      | 1,501 |
| Peak Top    | 21.002 | 1000.000 | 2,281      | Mz      | 2,685 |
| Peak End    | 23.110 | -24.636  | 21         | Mz+1    | 3,887 |
|             |        |          |            | Mv      | 1,501 |
| Height [mV] |        |          | 1026.036   | Mp      | 2,288 |
| Area [mV*s] |        |          | 98821.272  | Mz/Mw   | 1.788 |
| Area% [%]   |        |          | 100.000    | Mw/Mn   | 2.322 |
| [eta]       |        |          | 1501.42498 | Mz+1/Mw | 2.589 |

**Figure S37.** SEC trace of the polypropylene obtained in Table 1, entry 4 (1,2-dichlorobenzene, 145 °C)



# Chromatography Report

|                 |                   |                              |                              |
|-----------------|-------------------|------------------------------|------------------------------|
| Title           |                   | Measurement Date & Time      | 2020/03/10 18:51:08          |
| Sample Name     | 020-PP80          | Calculation Date & Time      | 2020/03/18 05:26:43          |
| Database Name   | 2020-03-10.chd    | Acquisition Time [min] [min] | 10.000 – 30.000              |
| Saved File Name | RSLT0606          | Sampling Pitch [ms] [ms]     | 100                          |
| Method Data     | meth8509_standard | Vial Number                  | 19                           |
| Calc. Channel   | RI EXT            | Calculation Method           | Molecular Weight Column test |

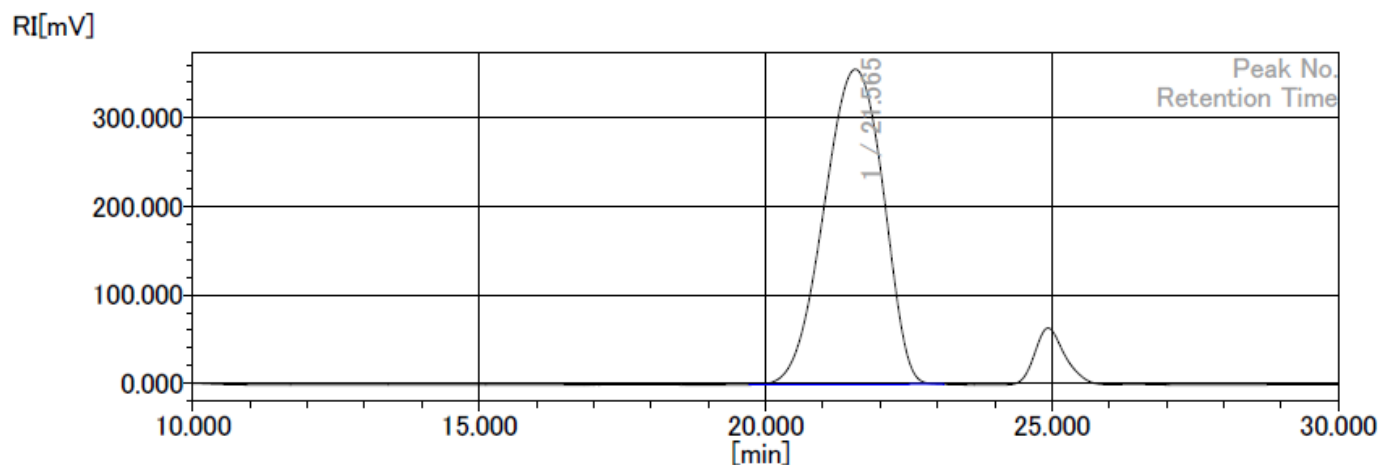

## Result of Calculation (RI) (RI)

### Peak 1 Base Peak

|             | [min]  | [mV]    | [mol]      | Mn      | 640   |
|-------------|--------|---------|------------|---------|-------|
| Peak Start  | 19.720 | -1.786  | 12,122     | Mw      | 1,232 |
| Peak Top    | 21.565 | 355.071 | 890        | Mz      | 2,082 |
| Peak End    | 23.110 | -1.110  | 21         | Mz+1    | 3,068 |
|             |        |         |            | Mv      | 1,232 |
| Height [mV] |        |         | 356.489    | Mp      | 1,038 |
| Area [mV*s] |        |         | 25594.820  | Mz/Mw   | 1.690 |
| Area% [%]   |        |         | 100.000    | Mw/Mn   | 1.925 |
| [eta]       |        |         | 1231.68501 | Mz+1/Mw | 2.491 |

**Figure S38.** SEC trace of the polypropylene obtained in Table 1, entry 5 (1,2-dichlorobenzene, 145 °C)

# High-temperature GPC Report

|                 |                   |                        |                              |
|-----------------|-------------------|------------------------|------------------------------|
| Title           |                   | Measurement Date       | 2019/02/06 17:35:15          |
| Sample Name     | 133-04-063        | Calculation Date       | 2019/02/06 18:14:03          |
| Database Name   | 2019-02-06.chd    | Measurement Time [min] | 10.000 - 30.000              |
| Saved File Name | RSLT0421          | Sampling Pitch [ms]    | 100                          |
| Method Data     | meth8509_standard | Cup Number             | 1                            |
| Calc. Channel   | RI EXT            | Calculation Method     | Molecular Weight Column test |

RI[mV]

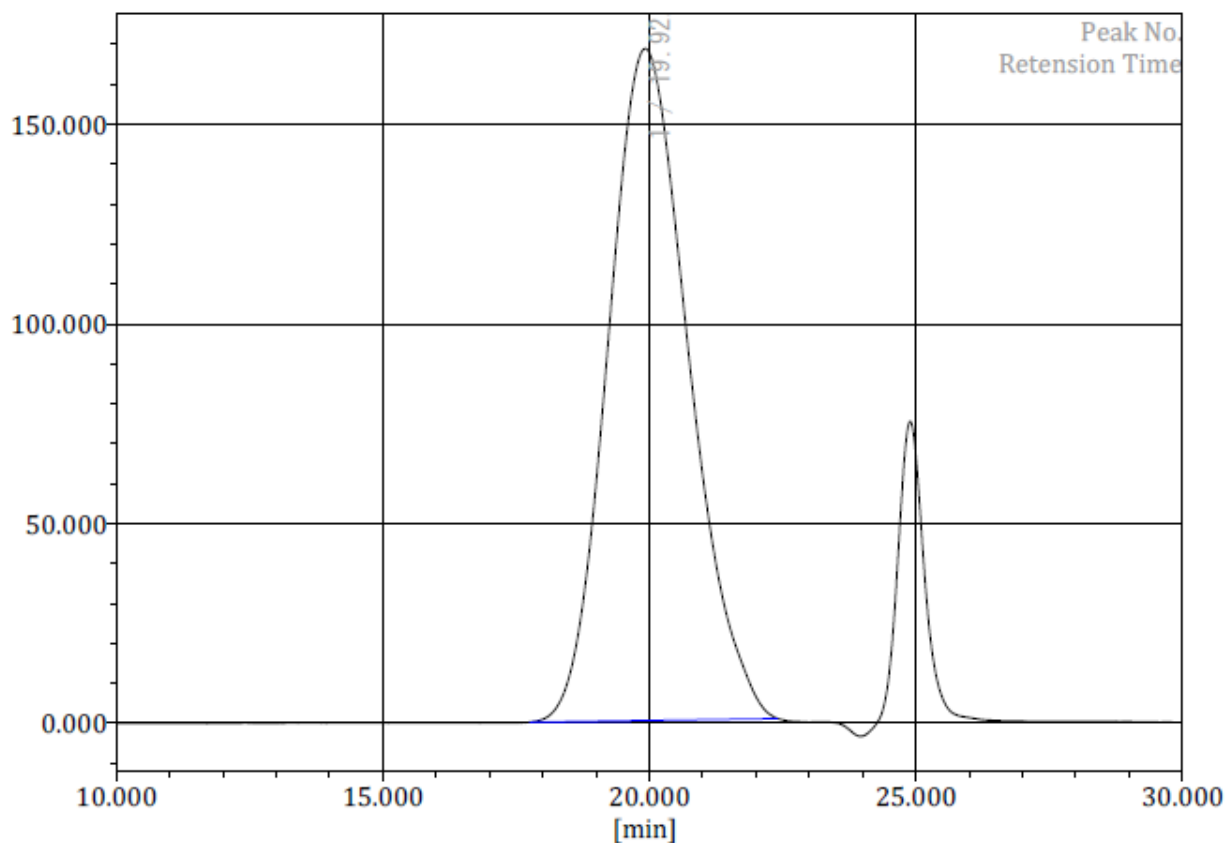

## Calculation Results (RI)

Peak No. 1 Base Peak

|             | [min]  | [mV]    | [mol]       | Mn      | 4,820  |
|-------------|--------|---------|-------------|---------|--------|
| Peak Start  | 17.770 | 0.215   | 83,650      | Mw      | 10,858 |
| Peak Top    | 19.922 | 169.004 | 9,620       | Mz      | 17,546 |
| Peak End    | 22.402 | 1.109   | 153         | Mz+1    | 24,441 |
|             |        |         |             | Mv      | 10,858 |
| Height [mV] |        |         | 168.374     | Mp      | 10,617 |
| Area [mV*s] |        |         | 17685.165   | Mz/Mw   | 1.616  |
| Area% [%]   |        |         | 100.000     | Mw/Mn   | 2.253  |
| [eta]       |        |         | 10858.41942 | Mz+1/Mw | 2.251  |

**Figure S39.** SEC trace of the polypropylene obtained in Table 1, entry 6 (1,2-dichlorobenzene, 145 °C)

# High-temperature GPC Report

|                 |                   |                        |                              |
|-----------------|-------------------|------------------------|------------------------------|
| Title           |                   | Measurement Date       | 2018/10/22 17:40:32          |
| Sample Name     | 133-03-119        | Calculation Date       | 2018/10/22 18:25:26          |
| Database Name   | 2018-10-22.chd    | Measurement Time [min] | 10.000 - 30.000              |
| Saved File Name | RSLT0333          | Sampling Pitch [ms]    | 100                          |
| Method Data     | meth8509_standard | Cup Number             | 1                            |
| Calc. Channel   | RI EXT            | Calculation Method     | Molecular Weight Column test |

RI[mV]

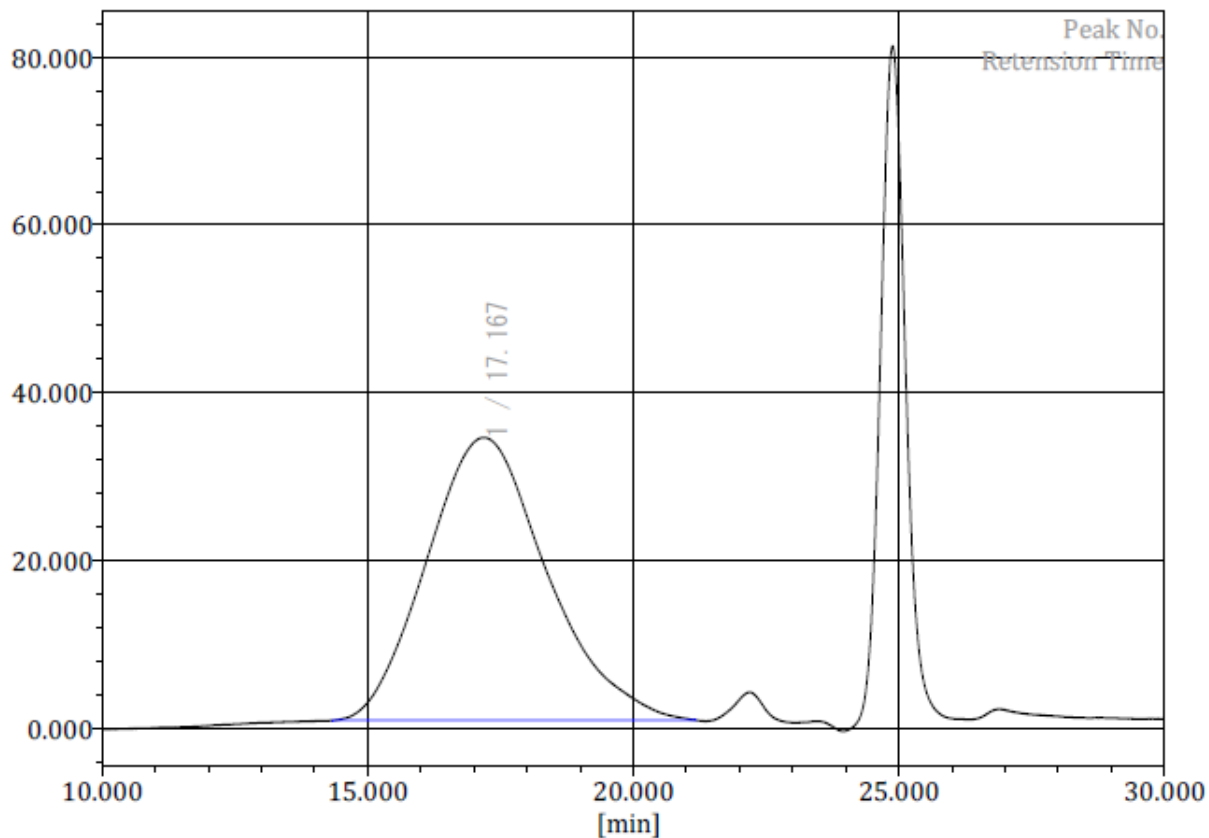

## Calculation Results (RI)

Peak No. 1 Base Peak

|             | [min]  | [mV]   | [mol]        | Mn      | 67,612  |
|-------------|--------|--------|--------------|---------|---------|
| Peak Start  | 14.338 | 1.043  | 1,780,805    | Mw      | 186,426 |
| Peak Top    | 17.167 | 34.721 | 144,416      | Mz      | 356,813 |
| Peak End    | 21.177 | 1.048  | 1,733        | Mz+1    | 548,510 |
|             |        |        |              | Mv      | 186,426 |
| Height [mV] |        |        | 33.676       | Mp      | 144,416 |
| Area [mV*s] |        |        | 5290.055     | Mz/Mw   | 1.914   |
| Area% [%]   |        |        | 100.000      | Mw/Mn   | 2.757   |
| [eta]       |        |        | 186425.75017 | Mz+1/Mw | 2.942   |

**Figure S40.** SEC trace of the ethylene / allyl acetate copolymer obtained in Table 2, entry 2 (1,2-dichlorobenzene, 145 °C)

# High-temperature GPC Report

|                 |                   |                        |                              |
|-----------------|-------------------|------------------------|------------------------------|
| Title           |                   | Measurement Date       | 2018/12/07 16:39:00          |
| Sample Name     | 133-04-010        | Calculation Date       | 2018/12/07 16:48:34          |
| Database Name   | 2018-12-07.chd    | Measurement Time [min] | 10.000 - 30.000              |
| Saved File Name | RSLT0384          | Sampling Pitch [ms]    | 100                          |
| Method Data     | meth8509_standard | Cup Number             | 1                            |
| Calc. Channel   | RI EXT            | Calculation Method     | Molecular Weight Column test |

RI[mV]

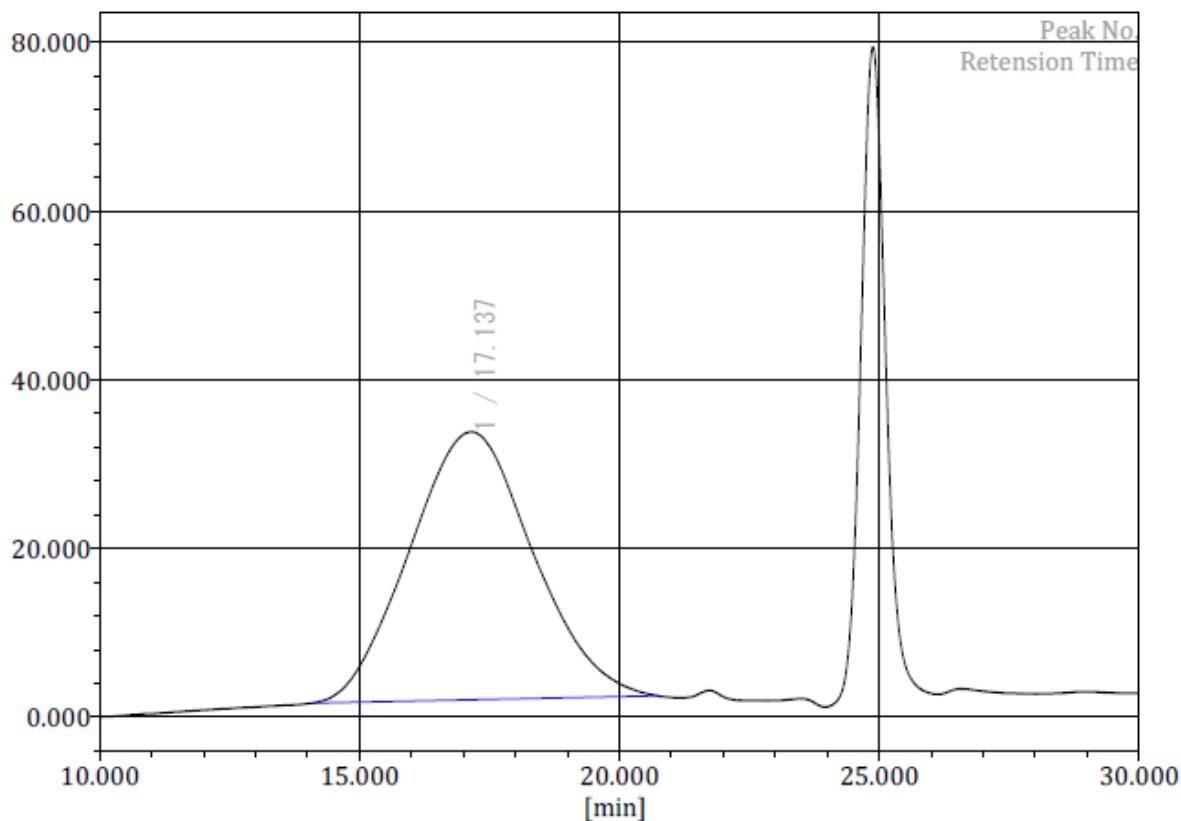

## Calculation Results (RI)

Peak No. 1 Base Peak

|             | [min]  | [mV]   | [mol]        | Mn      | 81,297  |
|-------------|--------|--------|--------------|---------|---------|
| Peak Start  | 14.118 | 1.661  | 2,153,247    | Mw      | 216,818 |
| Peak Top    | 17.137 | 33.872 | 148,362      | Mz      | 444,101 |
| Peak End    | 20.760 | 2.544  | 3,263        | Mz+1    | 711,246 |
|             |        |        |              | Mv      | 216,818 |
| Height [mV] |        |        | 31.810       | Mp      | 148,362 |
| Area [mV*s] |        |        | 5229.402     | Mz/Mw   | 2.048   |
| Area% [%]   |        |        | 100.000      | Mw/Mn   | 2.667   |
| [eta]       |        |        | 216818.11663 | Mz+1/Mw | 3.280   |

**Figure S41.** SEC trace of the ethylene / allyl acetate copolymer obtained in Table 2, entry 3 (1,2-dichlorobenzene, 145 °C)

# High-temperature GPC Report

|                 |                   |                        |                              |
|-----------------|-------------------|------------------------|------------------------------|
| Title           |                   | Measurement Date       | 2018/12/07 17:09:01          |
| Sample Name     | 133-04-011        | Calculation Date       | 2018/12/07 17:14:21          |
| Database Name   | 2018-12-07.chd    | Measurement Time [min] | 10.000 - 30.000              |
| Saved File Name | RSLT0385          | Sampling Pitch [ms]    | 100                          |
| Method Data     | meth8509_standard | Cup Number             | 2                            |
| Calc. Channel   | RI EXT            | Calculation Method     | Molecular Weight Column test |

RI[mV]

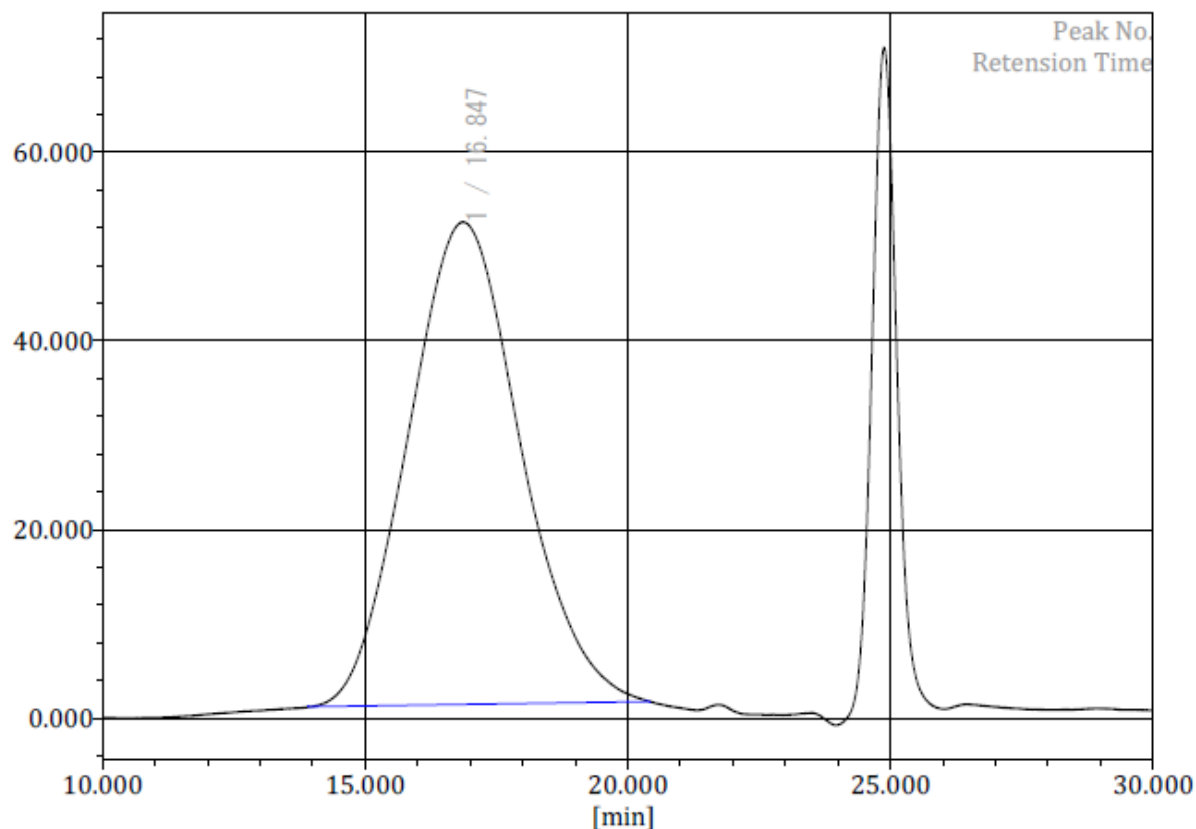

## Calculation Results (RI)

Peak No. 1 Base Peak

|             | [min]  | [mV]   | [mol]        | Mn      | 111,591 |
|-------------|--------|--------|--------------|---------|---------|
| Peak Start  | 13.922 | 1.195  | 2,547,503    | Mw      | 253,439 |
| Peak Top    | 16.847 | 52.631 | 192,428      | Mz      | 470,118 |
| Peak End    | 20.417 | 1.757  | 5,219        | Mz+1    | 732,011 |
|             |        |        |              | Mv      | 253,439 |
| Height [mV] |        |        | 51.183       | Mp      | 192,428 |
| Area [mV*s] |        |        | 7601.737     | Mz/Mw   | 1.855   |
| Area% [%]   |        |        | 100.000      | Mw/Mn   | 2.271   |
| [eta]       |        |        | 253439.01617 | Mz+1/Mw | 2.888   |

**Figure S42.** SEC trace of the ethylene / allyl acetate copolymer obtained in Table 2, entry 4 (1,2-dichlorobenzene, 145 °C)

# High-temperature GPC Report

|                 |                   |                        |                              |
|-----------------|-------------------|------------------------|------------------------------|
| Title           |                   | Measurement Date       | 2019/01/11 16:27:12          |
| Sample Name     | 133-04-028        | Calculation Date       | 2019/01/11 18:07:43          |
| Database Name   | 2019-01-11.chd    | Measurement Time [min] | 10.000 - 30.000              |
| Saved File Name | RSLT0400          | Sampling Pitch [ms]    | 100                          |
| Method Data     | meth8509_standard | Cup Number             | 1                            |
| Calc. Channel   | RI EXT            | Calculation Method     | Molecular Weight Column test |

RI[mV]

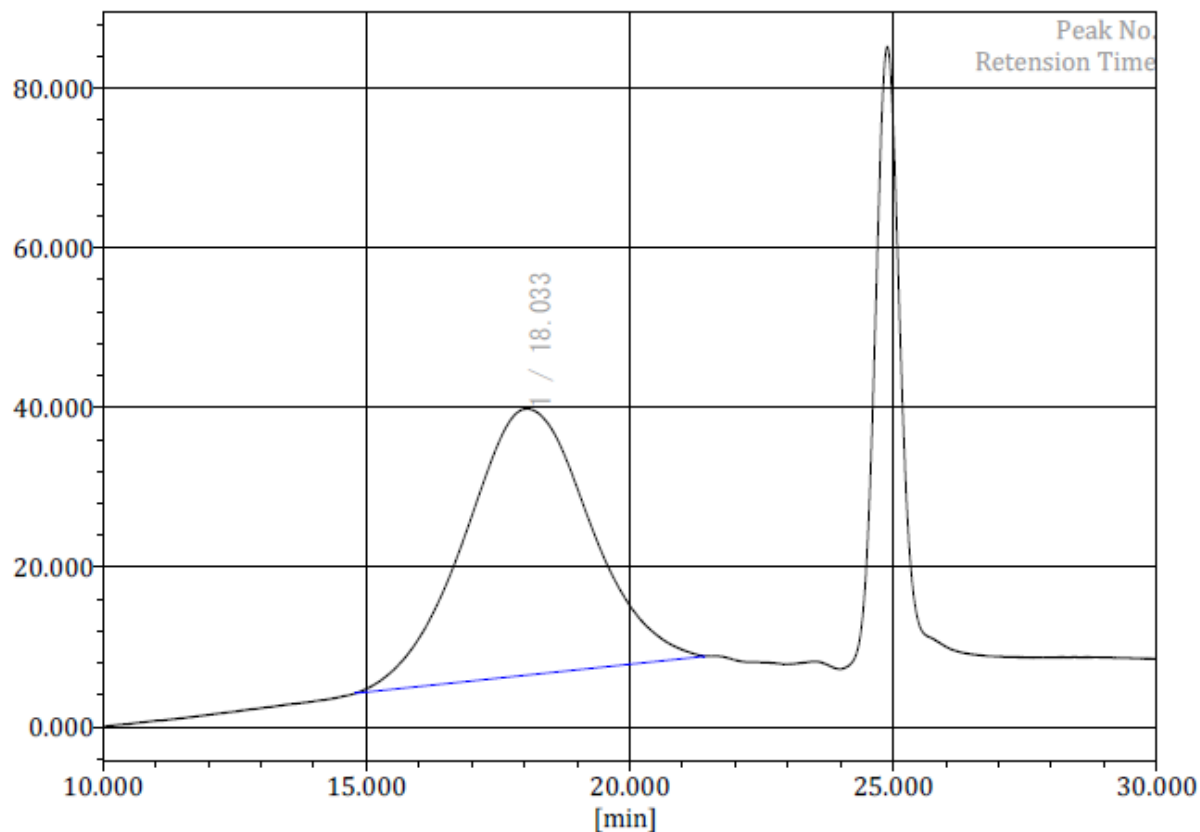

## Calculation Results (RI)

Peak No. 1 Base Peak

|             | [min]  | [mV]   | [mol]        | Mn      | 33,187  |
|-------------|--------|--------|--------------|---------|---------|
| Peak Start  | 14.803 | 4.213  | 1,186,113    | Mw      | 101,151 |
| Peak Top    | 18.033 | 39.893 | 65,675       | Mz      | 231,507 |
| Peak End    | 21.422 | 8.820  | 1,149        | Mz+1    | 402,513 |
|             |        |        |              | Mv      | 101,151 |
| Height [mV] |        |        | 33.432       | Mp      | 70,166  |
| Area [mV*s] |        |        | 5505.964     | Mz/Mw   | 2.289   |
| Area% [%]   |        |        | 100.000      | Mw/Mn   | 3.048   |
| [eta]       |        |        | 101150.56782 | Mz+1/Mw | 3.979   |

**Figure S43.** SEC trace of the ethylene / allyl acetate copolymer obtained in Table 2, entry 5 (1,2-dichlorobenzene, 145 °C)

## Chromatography Report

|                 |                   |                              |                              |
|-----------------|-------------------|------------------------------|------------------------------|
| Title           |                   | Measurement Date & Time      | 2020/03/17 22:27:31          |
| Sample Name     | 09-031            | Calculation Date & Time      | 2020/03/18 05:34:34          |
| Database Name   | 2020-03-17(3).chd | Acquisition Time [min] [min] | 10.000 - 30.000              |
| Saved File Name | RSLT0633          | Sampling Pitch [ms] [ms]     | 100                          |
| Method Data     | meth8509_standard | Vial Number                  | 10                           |
| Calc. Channel   | RI EXT            | Calculation Method           | Molecular Weight Column test |

RI[mV]

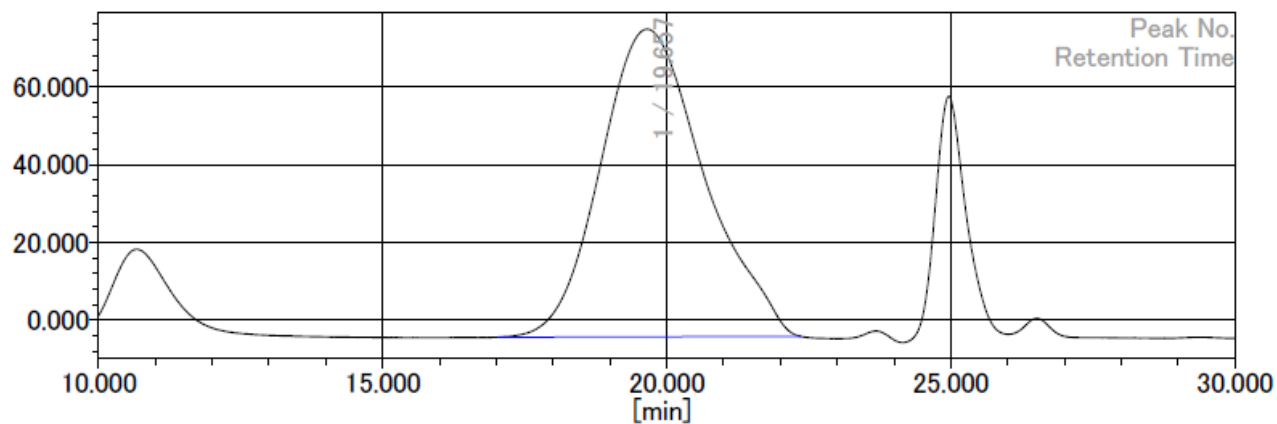

## Result of Calculation (RI) (RI)

Peak 1 Base Peak

|             | [min]  | [mV]   | [mol]       | Mn      | 5,155  |
|-------------|--------|--------|-------------|---------|--------|
| Peak Start  | 17.035 | -4.417 | 162,541     | Mw      | 15,313 |
| Peak Top    | 19.657 | 74.793 | 13,011      | Mz      | 28,253 |
| Peak End    | 22.353 | -4.167 | 172         | Mz+1    | 43,158 |
|             |        |        |             | Mv      | 15,313 |
| Height [mV] |        |        | 79.087      | Mp      | 14,766 |
| Area [mV*s] |        |        | 9995.126    | Mz/Mw   | 1.845  |
| Area% [%]   |        |        | 100.000     | Mw/Mn   | 2.970  |
| [eta]       |        |        | 15313.26166 | Mz+1/Mw | 2.818  |

**Figure S44.** SEC trace of the ethylene / allyl acetate copolymer obtained in Table 2, entry 7 (1,2-dichlorobenzene, 145 °C)

# High-temperature GPC Report

|                 |                   |                        |                              |
|-----------------|-------------------|------------------------|------------------------------|
| Title           |                   | Measurement Date       | 2019/02/12 17:30:40          |
| Sample Name     | 133-04-071        | Calculation Date       | 2019/02/12 18:12:18          |
| Database Name   | 2019-02-12.chd    | Measurement Time [min] | 10.000 - 30.000              |
| Saved File Name | RSLT0423          | Sampling Pitch [ms]    | 100                          |
| Method Data     | meth8509_standard | Cup Number             | 1                            |
| Calc. Channel   | RI EXT            | Calculation Method     | Molecular Weight Column test |

RI[mV]

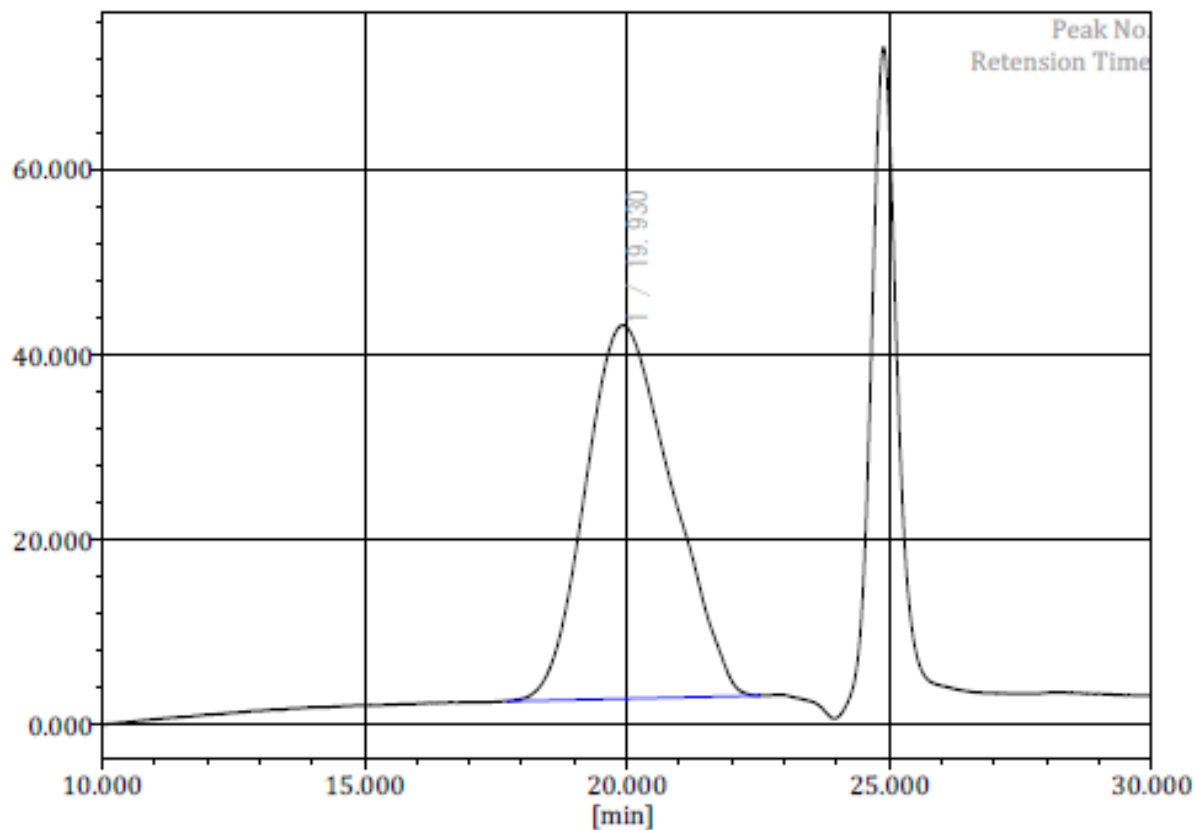

## Calculation Results (RI)

Peak No. 1 Base Peak

|             | [min]  | [mV]        | [mol]  | Mn      | 4,159  |
|-------------|--------|-------------|--------|---------|--------|
| Peak Start  | 17.720 | 2.572       | 87,555 | Mw      | 10,395 |
| Peak Top    | 19.930 | 43.230      | 9,527  | Mz      | 17,783 |
| Peak End    | 22.525 | 3.190       | 113    | Mz+1    | 25,320 |
|             |        |             |        | Mv      | 10,395 |
| Height [mV] |        | 40.374      |        | Mp      | 10,699 |
| Area [mV*s] |        | 4632.445    |        | Mz/Mw   | 1.711  |
| Area% [%]   |        | 100.000     |        | Mw/Mn   | 2.500  |
| [eta]       |        | 10395.25528 |        | Mz+1/Mw | 2.436  |

**Figure S45.** SEC trace of the propylene / allyl acetate copolymer obtained in Table 2, entry 9 (1,2-dichlorobenzene, 145 °C)



# High-temperature GPC Report

|                 |                   |                        |                              |
|-----------------|-------------------|------------------------|------------------------------|
| Title           |                   | Measurement Date       | 2018/11/02 17:33:55          |
| Sample Name     | 133-03-128        | Calculation Date       | 2018/11/02 18:10:16          |
| Database Name   | 2018-11-02.chd    | Measurement Time [min] | 10.000 - 30.000              |
| Saved File Name | RSLT0365          | Sampling Pitch [ms]    | 100                          |
| Method Data     | meth8509_standard | Cup Number             | 2                            |
| Calc. Channel   | RI EXT            | Calculation Method     | Molecular Weight Column test |

RI[mV]

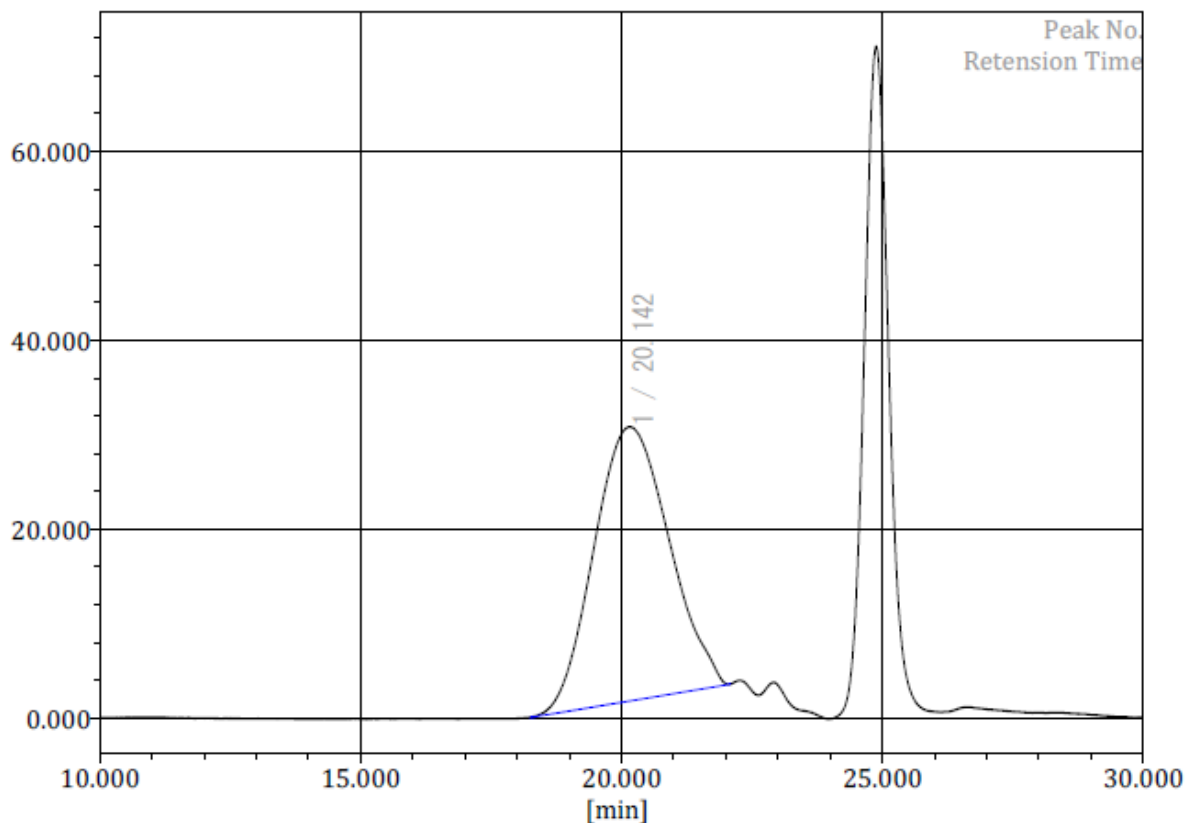

## Calculation Results (RI)

Peak No. 1 Base Peak

|             | [min]  | [mV]   | [mol]      | Mn      | 4,285  |
|-------------|--------|--------|------------|---------|--------|
| Peak Start  | 18.260 | 0.073  | 53,184     | Mw      | 8,439  |
| Peak Top    | 20.142 | 30.853 | 7,393      | Mz      | 13,195 |
| Peak End    | 22.083 | 3.580  | 318        | Mz+1    | 17,801 |
|             |        |        |            | Mv      | 8,439  |
| Height [mV] |        |        | 29.054     | Mp      | 8,346  |
| Area [mV*s] |        |        | 2900.175   | Mz/Mw   | 1.564  |
| Area% [%]   |        |        | 100.000    | Mw/Mn   | 1.969  |
| [eta]       |        |        | 8438.80311 | Mz+1/Mw | 2.109  |

**Figure S46.** SEC trace of the propylene / 3-butetyl acetate copolymer obtained in Table 2, entry 10 (1,2-dichlorobenzene, 145 °C)

## Chromatography Report

|                 |                   |                              |                              |
|-----------------|-------------------|------------------------------|------------------------------|
| Title           |                   | Measurement Date & Time      | 2019/09/06 19:24:39          |
| Sample Name     | 068-Zn            | Calculation Date & Time      | 2019/12/24 15:59:56          |
| Database Name   | 2019-09-06.chd    | Acquisition Time [min] [min] | 10.000 – 30.000              |
| Saved File Name | RSLT0496          | Sampling Pitch [ms] [ms]     | 100                          |
| Method Data     | meth8509_standard | Vial Number                  | 24                           |
| Calc. Channel   | RI EXT            | Calculation Method           | Molecular Weight Column test |

RI[mV]

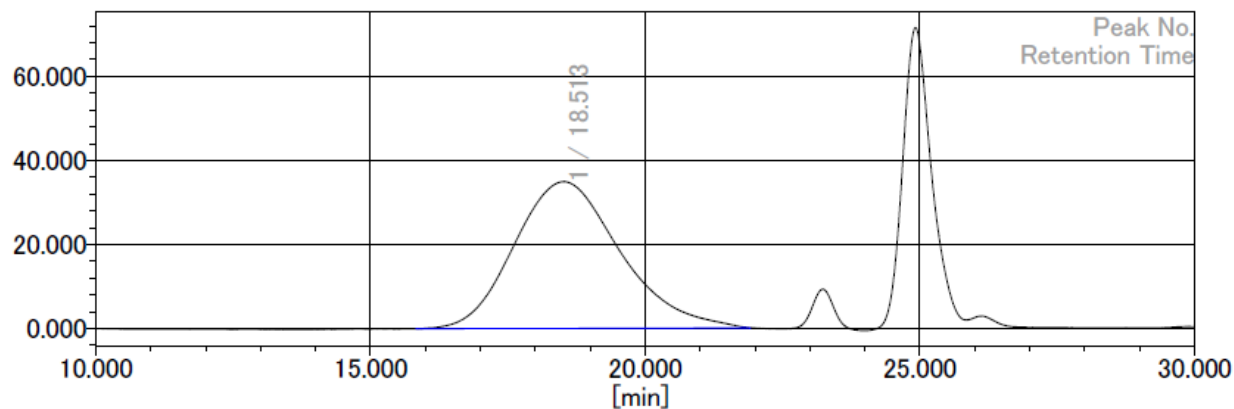

## Result of Calculation (RI) (RI)

Peak 1 Base Peak

|             | [min]  | [mV]   | [mol]       | Mn      | 19,231  |
|-------------|--------|--------|-------------|---------|---------|
| Peak Start  | 15.833 | -0.059 | 475,684     | Mw      | 49,895  |
| Peak Top    | 18.513 | 34.998 | 41,850      | Mz      | 86,809  |
| Peak End    | 21.912 | 0.175  | 456         | Mz+1    | 129,945 |
|             |        |        |             | Mv      | 49,895  |
| Height [mV] |        |        | 34.954      | Mp      | 44,243  |
| Area [mV*s] |        |        | 4674.963    | Mz/Mw   | 1.740   |
| Area% [%]   |        |        | 100.000     | Mw/Mn   | 2.595   |
| [eta]       |        |        | 49895.32259 | Mz+1/Mw | 2.604   |

**Figure S47.** SEC trace of the ethylene / allyl acetate copolymer obtained in Table 3, entry 2 (1,2-dichlorobenzene, 145 °C)

# Chromatography Report

|                 |                   |                              |                              |
|-----------------|-------------------|------------------------------|------------------------------|
| Title           |                   | Measurement Date & Time      | 2019/09/06 18:24:37          |
| Sample Name     | 062-BCF           | Calculation Date & Time      | 2019/12/24 16:02:08          |
| Database Name   | 2019-09-06.chd    | Acquisition Time [min] [min] | 10.000 - 30.000              |
| Saved File Name | RSLT0494          | Sampling Pitch [ms] [ms]     | 100                          |
| Method Data     | meth8509_standard | Vial Number                  | 22                           |
| Calc. Channel   | RI EXT            | Calculation Method           | Molecular Weight Column test |

RI[mV]

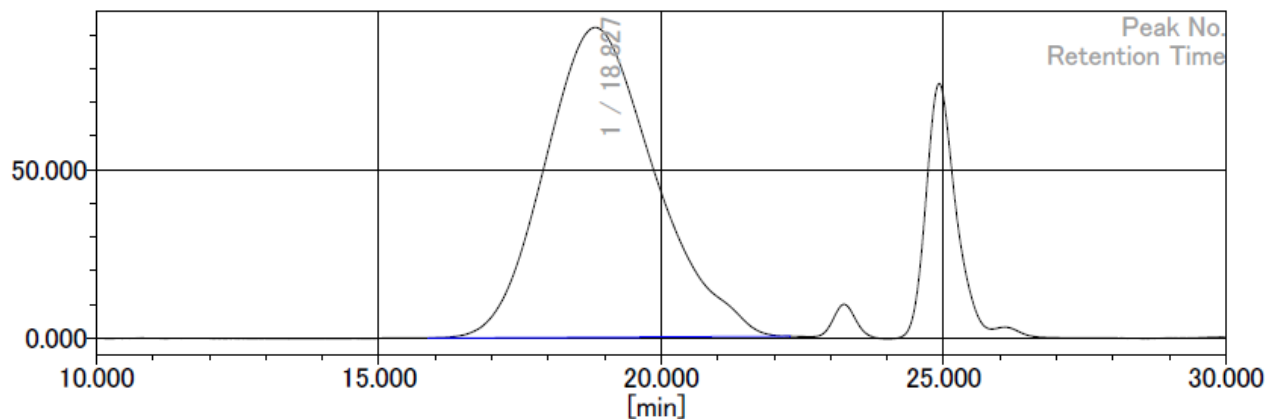

## Result of Calculation (RI) (RI)

Peak 1 Base Peak

|             | [min]  | [mV]   | [mol]       | Mn      | 13,386  |
|-------------|--------|--------|-------------|---------|---------|
| Peak Start  | 15.882 | 0.085  | 455,622     | Mw      | 36,736  |
| Peak Top    | 18.827 | 92.189 | 30,885      | Mz      | 66,491  |
| Peak End    | 22.280 | 0.638  | 204         | Mz+1    | 102,518 |
|             |        |        |             | Mv      | 36,736  |
| Height [mV] |        |        | 91.849      | Mp      | 33,082  |
| Area [mV*s] |        |        | 12380.172   | Mz/Mw   | 1.810   |
| Area% [%]   |        |        | 100.000     | Mw/Mn   | 2.744   |
| [eta]       |        |        | 36736.19678 | Mz+1/Mw | 2.791   |

**Figure S48.** SEC trace of the ethylene / allyl acetate copolymer obtained in Table 3, entry 3 (1,2-dichlorobenzene, 145 °C)

Chromatography Report

|                 |                   |                              |                              |
|-----------------|-------------------|------------------------------|------------------------------|
| Title           |                   | Measurement Date & Time      | 2019/09/06 18:54:37          |
| Sample Name     | 063-MAO           | Calculation Date & Time      | 2019/12/24 16:01:18          |
| Database Name   | 2019-09-06.chd    | Acquisition Time [min] [min] | 10.000 - 30.000              |
| Saved File Name | RSLT0495          | Sampling Pitch [ms] [ms]     | 100                          |
| Method Data     | meth8509_standard | Vial Number                  | 23                           |
| Calc. Channel   | RI EXT            | Calculation Method           | Molecular Weight Column test |

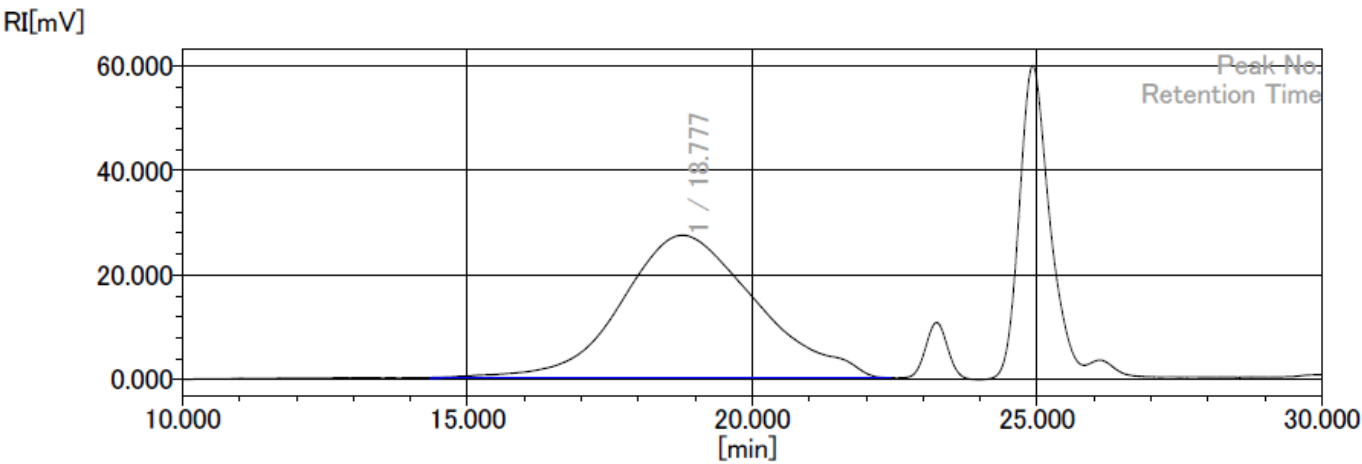

Result of Calculation (RI) (RI)

Peak 1 Base Peak

|             | [min]  | [mV]        | [mol]     | Mn      | 9,488   |
|-------------|--------|-------------|-----------|---------|---------|
| Peak Start  | 14.338 | 0.345       | 1,780,805 | Mw      | 50,582  |
| Peak Top    | 18.777 | 27.634      | 32,440    | Mz      | 203,918 |
| Peak End    | 22.427 | 0.377       | 144       | Mz+1    | 599,884 |
|             |        |             |           | Mv      | 50,582  |
| Height [mV] |        | 27.271      |           | Mp      | 35,245  |
| Area [mV*s] |        | 4480.479    |           | Mz/Mw   | 4.031   |
| Area% [%]   |        | 100.000     |           | Mw/Mn   | 5.331   |
| [eta]       |        | 50582.42709 |           | Mz+1/Mw | 11.860  |

**Figure S49.** SEC trace of the ethylene / allyl acetate copolymer obtained in Table 3, entry 4 (1,2-dichlorobenzene, 145 °C)

# Chromatography Report

|                 |                   |                              |                              |
|-----------------|-------------------|------------------------------|------------------------------|
| Title           |                   | Measurement Date & Time      | 2019/09/28 19:22:20          |
| Sample Name     | 70-08-079-5mL     | Calculation Date & Time      | 2019/12/24 16:05:37          |
| Database Name   | 2019-09-28(2).chd | Acquisition Time [min] [min] | 10.000 – 30.000              |
| Saved File Name | RSLT0503          | Sampling Pitch [ms] [ms]     | 100                          |
| Method Data     | meth8509_standard | Vial Number                  | 5                            |
| Calc. Channel   | RI EXT            | Calculation Method           | Molecular Weight Column test |

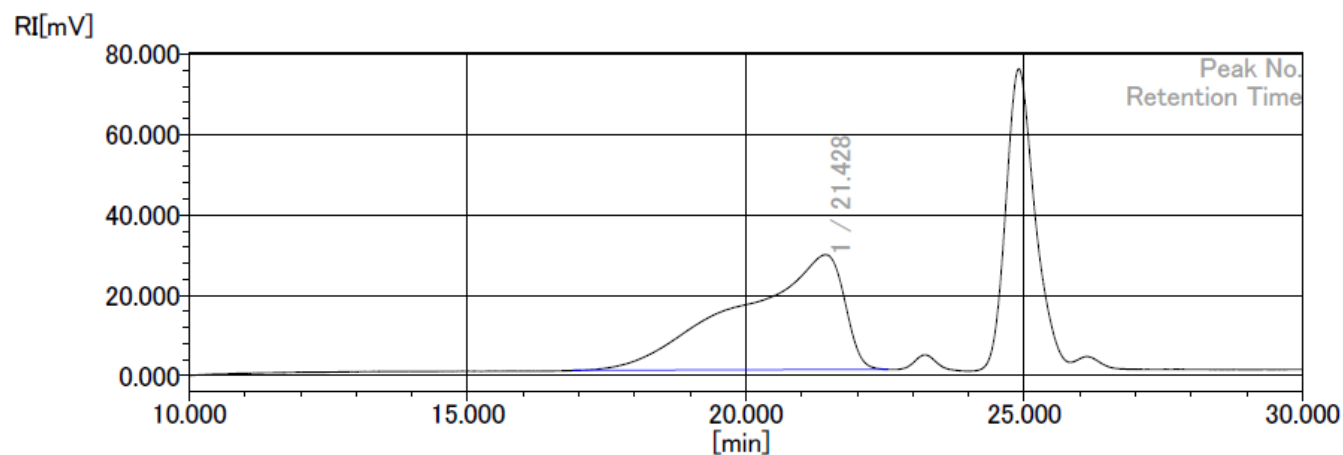

## Result of Calculation (RI) (RI)

Peak 1 Base Peak

|             | [min]  | [mV]   | [mol]       | Mn      | 2,062  |
|-------------|--------|--------|-------------|---------|--------|
| Peak Start  | 16.912 | 1.355  | 181,545     | Mw      | 10,068 |
| Peak Top    | 21.428 | 30.158 | 1,136       | Mz      | 31,633 |
| Peak End    | 22.548 | 1.607  | 106         | Mz+1    | 54,735 |
|             |        |        |             | Mv      | 10,068 |
| Height [mV] |        |        | 28.601      | Mp      | 1,315  |
| Area [mV*s] |        |        | 3726.658    | Mz/Mw   | 3.142  |
| Area% [%]   |        |        | 100.000     | Mw/Mn   | 4.882  |
| [eta]       |        |        | 10068.04385 | Mz+1/Mw | 5.436  |

**Figure S50.** SEC trace of the ethylene / allyl acetate copolymer obtained in Table 3, entry 5 (1,2-dichlorobenzene, 145 °C)

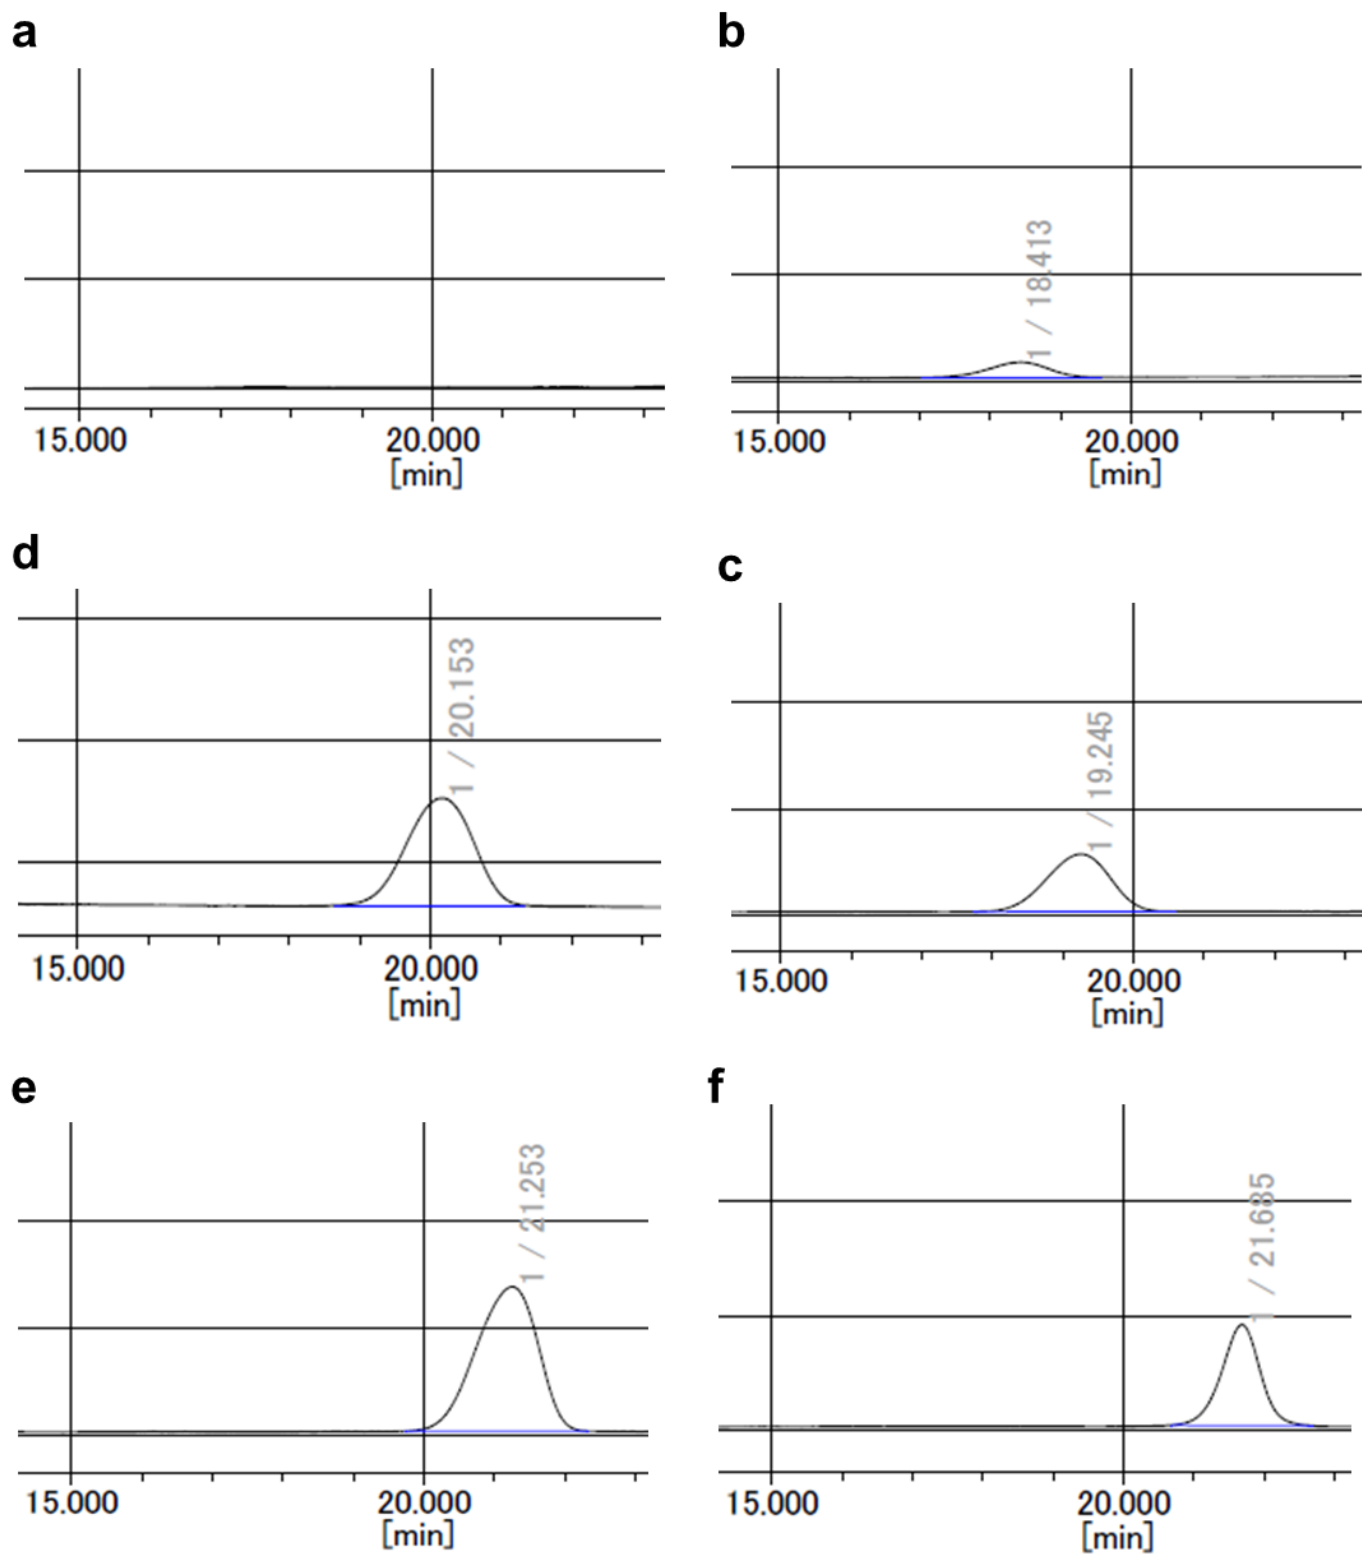

**Figure S51.** SEC traces of the collected eluents from SEC measurement of polymer from Table 3, entry 5 (1,2-dichlorobenzene, 145 °C). Eluent of **a**, retention time 17–18 min. **b**, retention time 18–19 min. **c**, retention time 19–20 min. **d**, retention time 20–21 min. **e**, retention time 21–22 min. and **f**, retention time 22–23 min.

# Chromatography Report

|                 |                   |                              |                              |
|-----------------|-------------------|------------------------------|------------------------------|
| Title           |                   | Measurement Date & Time      | 2019/09/30 06:35:13          |
| Sample Name     | 70-08-085-500eq   | Calculation Date & Time      | 2019/12/24 16:09:32          |
| Database Name   | 2019-09-30.chd    | Acquisition Time [min] [min] | 10.000 – 30.000              |
| Saved File Name | RSLT0508          | Sampling Pitch [ms] [ms]     | 100                          |
| Method Data     | meth8509_standard | Vial Number                  | 7                            |
| Calc. Channel   | RI EXT            | Calculation Method           | Molecular Weight Column test |

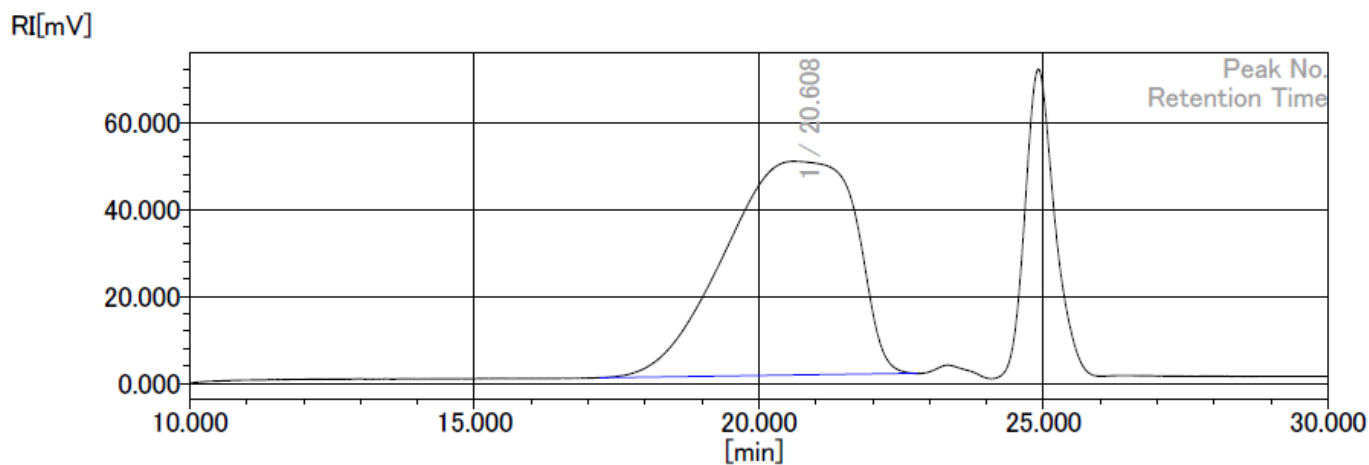

## Result of Calculation (RI) (RI)

Peak 1 Base Peak

|             | [min]  | [mV]   | [mol]      | Mn      | 2.062  |
|-------------|--------|--------|------------|---------|--------|
| Peak Start  | 17.207 | 1.305  | 139,314    | Mw      | 8,528  |
| Peak Top    | 20.608 | 51.047 | 4,036      | Mz      | 22,870 |
| Peak End    | 22.770 | 2.352  | 59         | Mz+1    | 39,886 |
|             |        |        |            | Mv      | 8,528  |
| Height [mV] |        |        | 49.102     | Mp      | 6,545  |
| Area [mV*s] |        |        | 7794.272   | Mz/Mw   | 2.682  |
| Area% [%]   |        |        | 100.000    | Mw/Mn   | 4.136  |
| [eta]       |        |        | 8528.06827 | Mz+1/Mw | 4.677  |

**Figure S52.** SEC trace of the ethylene / allyl acetate copolymer obtained in Table 3, entry 6 (1,2-dichlorobenzene, 145 °C)

## Chromatography Report

|                 |                   |                              |                              |
|-----------------|-------------------|------------------------------|------------------------------|
| Title           |                   | Measurement Date & Time      | 2019/11/08 23:20:14          |
| Sample Name     | 70-08-111-EVA     | Calculation Date & Time      | 2019/11/09 11:10:46          |
| Database Name   | 2019-11-08(2).chd | Acquisition Time [min] [min] | 10.000 - 30.000              |
| Saved File Name | RSLT0537          | Sampling Pitch [ms] [ms]     | 100                          |
| Method Data     | meth8509_standard | Vial Number                  | 2                            |
| Calc. Channel   | RI EXT            | Calculation Method           | Molecular Weight Column test |

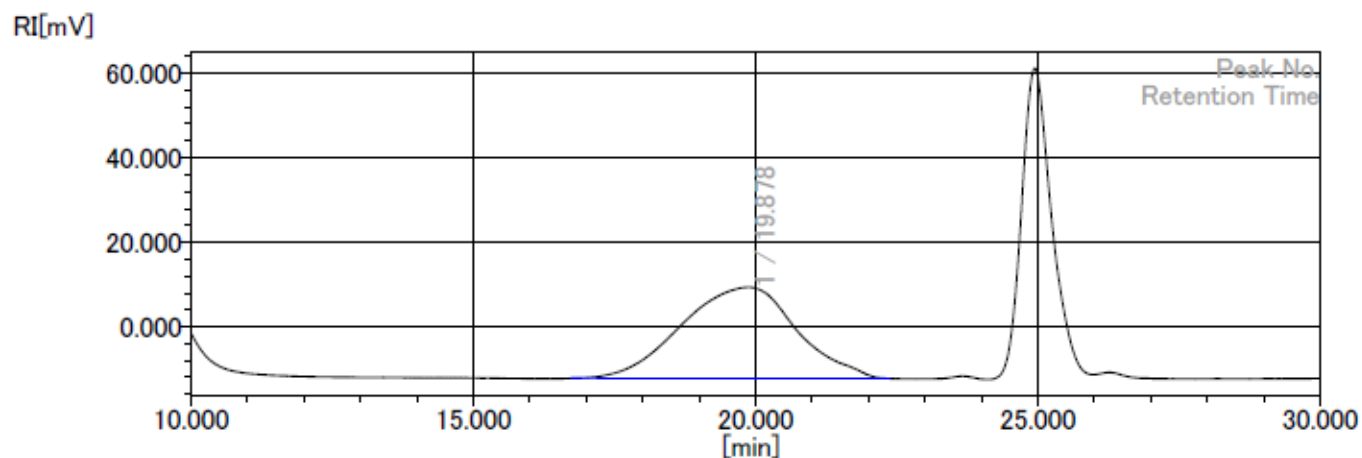

## Result of Calculation (RI) (RI)

Peak 1 Base Peak

|             | [min]  | [mV]    | [mol]       | Mn      | 5,914  |
|-------------|--------|---------|-------------|---------|--------|
| Peak Start  | 16.740 | -12.181 | 211,704     | Mw      | 18,629 |
| Peak Top    | 19.878 | 9.409   | 10,118      | Mz      | 38,471 |
| Peak End    | 22.377 | -12.247 | 163         | Mz+1    | 61,280 |
|             |        |         |             | Mv      | 18,629 |
| Height [mV] |        |         | 21.627      | Mp      | 13,084 |
| Area [mV*s] |        |         | 3053.674    | Mz/Mw   | 2.065  |
| Area% [%]   |        |         | 100.000     | Mw/Mn   | 3.150  |
| [eta]       |        |         | 18629.24937 | Mz+1/Mw | 3.289  |

**Figure S53.** SEC trace of the polyethylene obtained in Table 3, entry 7 (1,2-dichlorobenzene, 145 °C)



# Chromatography Report

|                 |                   |                              |                              |
|-----------------|-------------------|------------------------------|------------------------------|
| Title           |                   | Measurement Date & Time      | 2019/11/08 22:50:13          |
| Sample Name     | 70-08-105-EMA     | Calculation Date & Time      | 2019/11/09 11:10:29          |
| Database Name   | 2019-11-08(2).chd | Acquisition Time [min] [min] | 10.000 – 30.000              |
| Saved File Name | RSLT0536          | Sampling Pitch [ms] [ms]     | 100                          |
| Method Data     | meth8509_standard | Vial Number                  | 1                            |
| Calc. Channel   | RI EXT            | Calculation Method           | Molecular Weight Column test |

RI[mV]

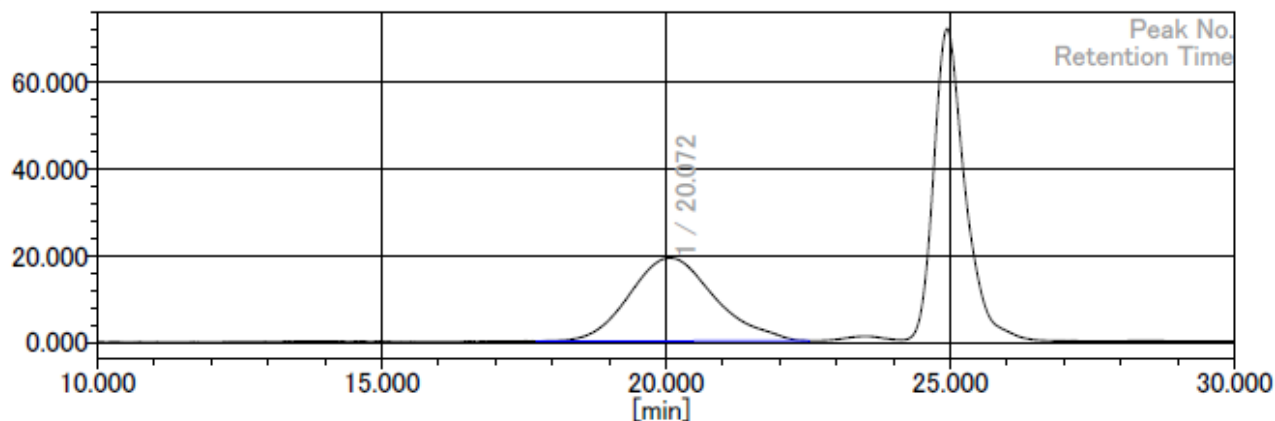

## Result of Calculation (RI) (RI)

Peak 1 Base Peak

|             | [min]  | [mV]   | [mol]      | Mn      | 4,010  |
|-------------|--------|--------|------------|---------|--------|
| Peak Start  | 17.720 | 0.187  | 87,555     | Mw      | 9,612  |
| Peak Top    | 20.072 | 19.497 | 8,050      | Mz      | 16,205 |
| Peak End    | 22.500 | 0.373  | 120        | Mz+1    | 23,813 |
|             |        |        |            | Mv      | 9,612  |
| Height [mV] |        |        | 19.218     | Mp      | 9,215  |
| Area [mV*s] |        |        | 1999.713   | Mz/Mw   | 1.686  |
| Area% [%]   |        |        | 100.000    | Mw/Mn   | 2.397  |
| [eta]       |        |        | 9611.76027 | Mz+1/Mw | 2.478  |

**Figure S54.** SEC trace of the ethylene / methyl acrylate copolymer obtained in Table 3, entry 8 (1,2-dichlorobenzene, 145 °C)

# Chromatography Report

Title  
Sample Name 70-08-133-2  
Database Name 2020-01-14.chd  
Saved File Name RSLT0563  
Method Data meth8509\_standard  
Calc. Channel RI EXT

Measurement Date & Time 2020/01/14 22:25:47  
Calculation Date & Time 2020/01/15 09:19:11  
Acquisition Time [min] [min] 10.000 – 30.000  
Sampling Pitch [ms] [ms] 100  
Vial Number 8  
Calculation Method Molecular Weight Column test

RI[mV]

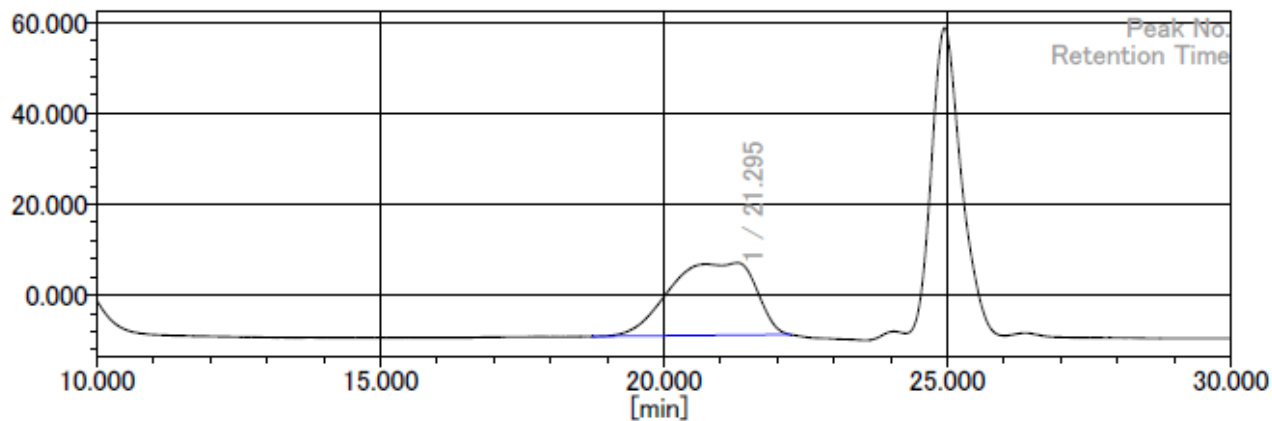

## Result of Calculation (RI) (RI)

Peak 1 Base Peak

|             | [min]  | [mV]   | [mol]      | Mn      | 1.982  |
|-------------|--------|--------|------------|---------|--------|
| Peak Start  | 18.750 | -9.021 | 33.297     | Mw      | 4.051  |
| Peak Top    | 21.295 | 7.185  | 1.426      | Mz      | 7.059  |
| Peak End    | 22.230 | -8.600 | 229        | Mz+1    | 10.104 |
|             |        |        |            | Mv      | 4.051  |
| Height [mV] |        |        | 15.898     | Mp      | 4.254  |
| Area [mV*s] |        |        | 1674.795   | Mz/Mw   | 1.742  |
| Area% [%]   |        |        | 100.000    | Mw/Mn   | 2.044  |
| [eta]       |        |        | 4051.40028 | Mz+1/Mw | 2.494  |

**Figure S55.** SEC trace of the propylene / allyl acetate copolymer obtained in Table 3, entry 9 (1,2-dichlorobenzene, 145 °C).

## Chromatography Report

|                 |                   |                              |                              |
|-----------------|-------------------|------------------------------|------------------------------|
| Title           |                   | Measurement Date & Time      | 2020/01/14 22:55:48          |
| Sample Name     | 70-08-134         | Calculation Date & Time      | 2020/01/16 18:49:08          |
| Database Name   | 2020-01-14.chd    | Acquisition Time [min] [min] | 10.000 – 30.000              |
| Saved File Name | RSLT0564          | Sampling Pitch [ms] [ms]     | 100                          |
| Method Data     | meth8509_standard | Vial Number                  | 9                            |
| Calc. Channel   | RI EXT            | Calculation Method           | Molecular Weight Column test |

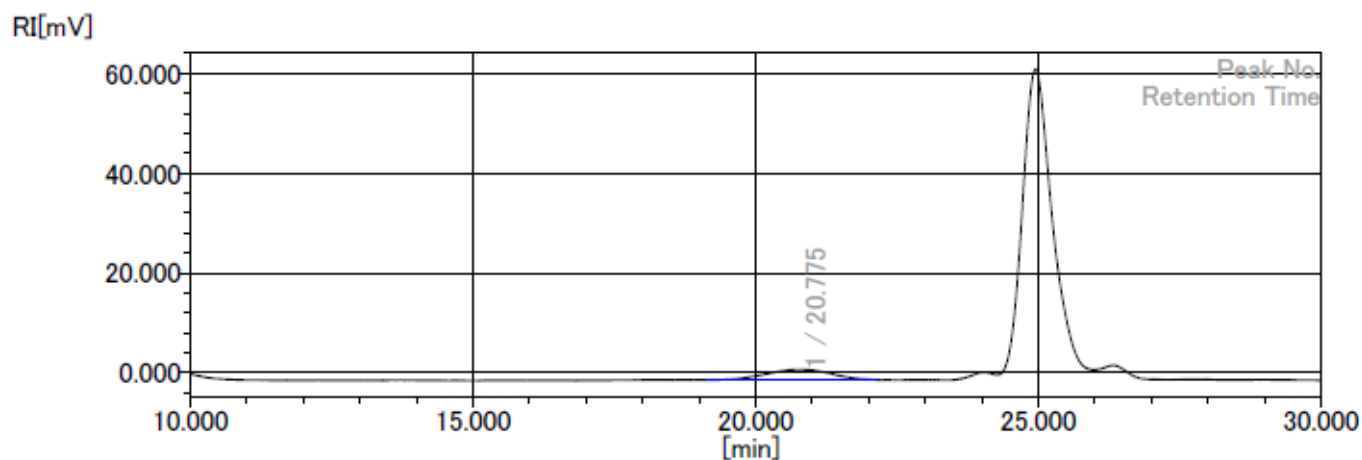

## Result of Calculation (RI) (RI)

## Peak 1 Base Peak

|             | [min]  | [mV]   | [mol]      | Mn      | 2,403 |
|-------------|--------|--------|------------|---------|-------|
| Peak Start  | 19.138 | -1.424 | 22,591     | Mw      | 4,011 |
| Peak Top    | 20.775 | 0.706  | 3,194      | Mz      | 6,045 |
| Peak End    | 22.142 | -1.384 | 279        | Mz+1    | 8,229 |
|             |        |        |            | Mv      | 4,011 |
| Height [mV] |        |        | 2.108      | Mp      | 3,750 |
| Area [mV*s] |        |        | 164.479    | Mz/Mw   | 1.507 |
| Area% [%]   |        |        | 100.000    | Mw/Mn   | 1.670 |
| [eta]       |        |        | 4011.04032 | Mz+1/Mw | 2.052 |

**Figure S56.** SEC trace of the propylene / allyl acetate copolymer obtained in Table 3, entry 10 (1,2-dichlorobenzene, 145 °C).

## Chromatography Report

|                 |                   |                              |                              |
|-----------------|-------------------|------------------------------|------------------------------|
| Title           |                   | Measurement Date & Time      | 2020/03/17 19:52:10          |
| Sample Name     | 09-032            | Calculation Date & Time      | 2020/03/18 05:32:48          |
| Database Name   | 2020-03-17(2).chd | Acquisition Time [min] [min] | 10.000 – 30.000              |
| Saved File Name | RSLT0631          | Sampling Pitch [ms] [ms]     | 100                          |
| Method Data     | meth8509_standard | Vial Number                  | 7                            |
| Calc. Channel   | RI EXT            | Calculation Method           | Molecular Weight Column test |

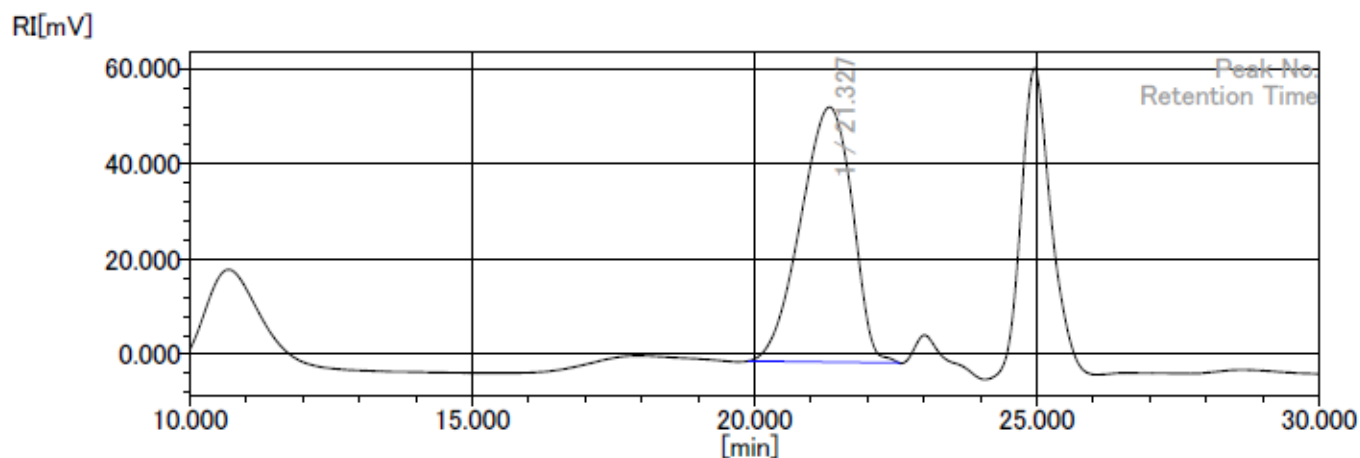

## Result of Calculation (RI) (RI)

## Peak 1 Base Peak

|             | [min]  | [mV]   | [mol]      | Mn      | 1,165 |
|-------------|--------|--------|------------|---------|-------|
| Peak Start  | 19.913 | -1.378 | 9,714      | Mw      | 1,827 |
| Peak Top    | 21.327 | 51.945 | 1,352      | Mz      | 2,696 |
| Peak End    | 22.557 | -1.774 | 104        | Mz+1    | 3,649 |
|             |        |        |            | Mv      | 1,827 |
| Height [mV] |        |        | 53.535     | Mp      | 1,488 |
| Area [mV*s] |        |        | 3399.011   | Mz/Mw   | 1.475 |
| Area% [%]   |        |        | 100.000    | Mw/Mn   | 1.568 |
| [eta]       |        |        | 1827.32879 | Mz+1/Mw | 1.997 |

**Figure S57.** SEC trace of the propylene / allyl acetate copolymer obtained in Table S1, entry 1 (1,2-dichlorobenzene, 145 °C).

## Chromatography Report

|                 |                   |                              |                              |
|-----------------|-------------------|------------------------------|------------------------------|
| Title           |                   | Measurement Date & Time      | 2020/03/17 22:57:32          |
| Sample Name     | 09-034            | Calculation Date & Time      | 2020/03/18 05:35:25          |
| Database Name   | 2020-03-17(3).chd | Acquisition Time [min] [min] | 10.000 – 30.000              |
| Saved File Name | RSLT0634          | Sampling Pitch [ms] [ms]     | 100                          |
| Method Data     | meth8509_standard | Vial Number                  | 11                           |
| Calc. Channel   | RI EXT            | Calculation Method           | Molecular Weight Column test |

RI[mV]

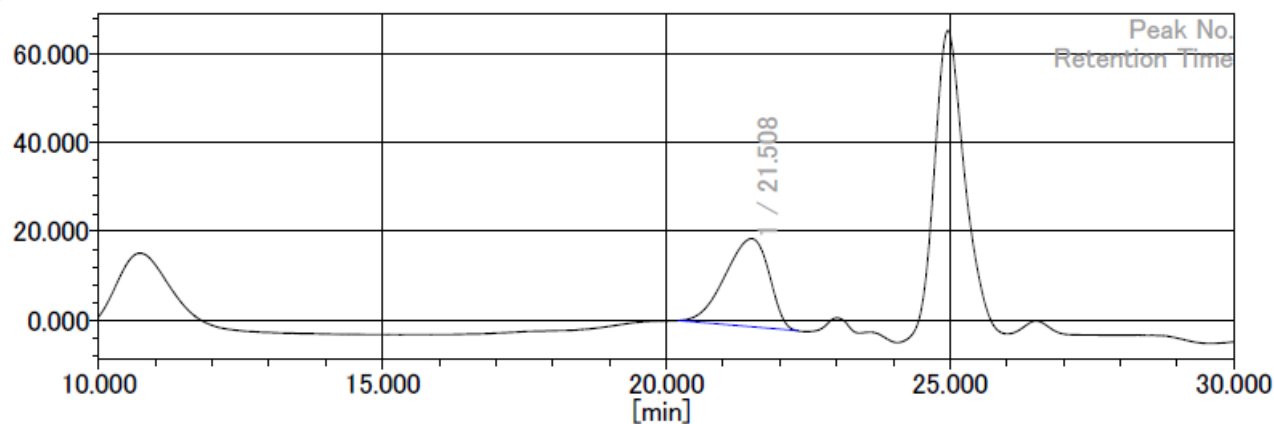

## Result of Calculation (RI) (RI)

Peak 1 Base Peak

|             | [min]  | [mV]   | [mol]      | Mn      | 991   |
|-------------|--------|--------|------------|---------|-------|
| Peak Start  | 20.220 | -0.115 | 6,710      | Mw      | 1,396 |
| Peak Top    | 21.508 | 18.421 | 986        | Mz      | 1,950 |
| Peak End    | 22.303 | -2.376 | 193        | Mz+1    | 2,581 |
|             |        |        |            | Mv      | 1,396 |
| Height [mV] |        |        | 19.934     | Mp      | 1,091 |
| Area [mV*s] |        |        | 1070.835   | Mz/Mw   | 1.396 |
| Area% [%]   |        |        | 100.000    | Mw/Mn   | 1.409 |
| [eta]       |        |        | 1396.41967 | Mz+1/Mw | 1.848 |

**Figure S58.** SEC trace of the propylene / allyl acetate copolymer obtained in Table S1, entry 2 (1,2-dichlorobenzene, 145 °C).

#### 4. DSC Traces

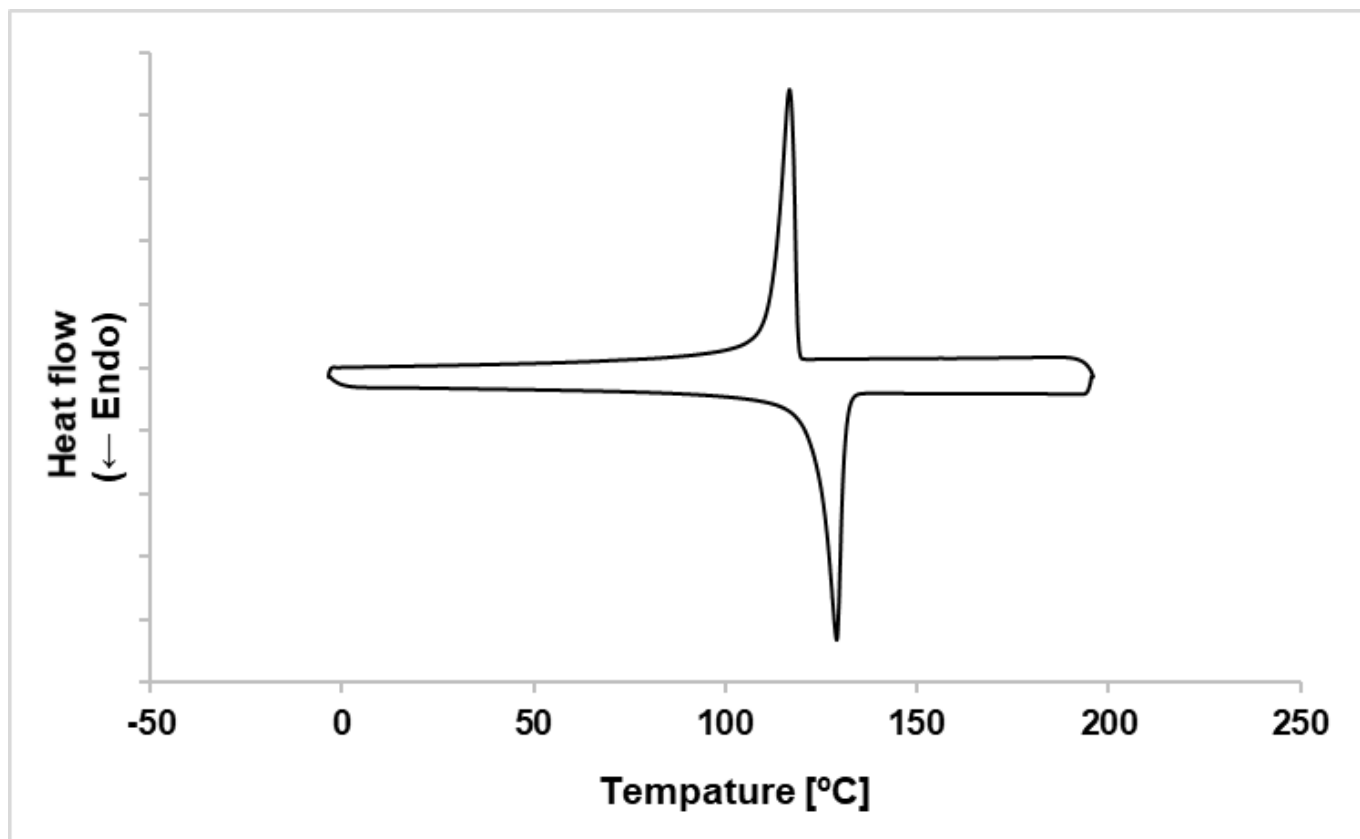

**Figure S59.** DSC trace of the ethylene / allyl acetate copolymer obtained in Table 3, entry 2.

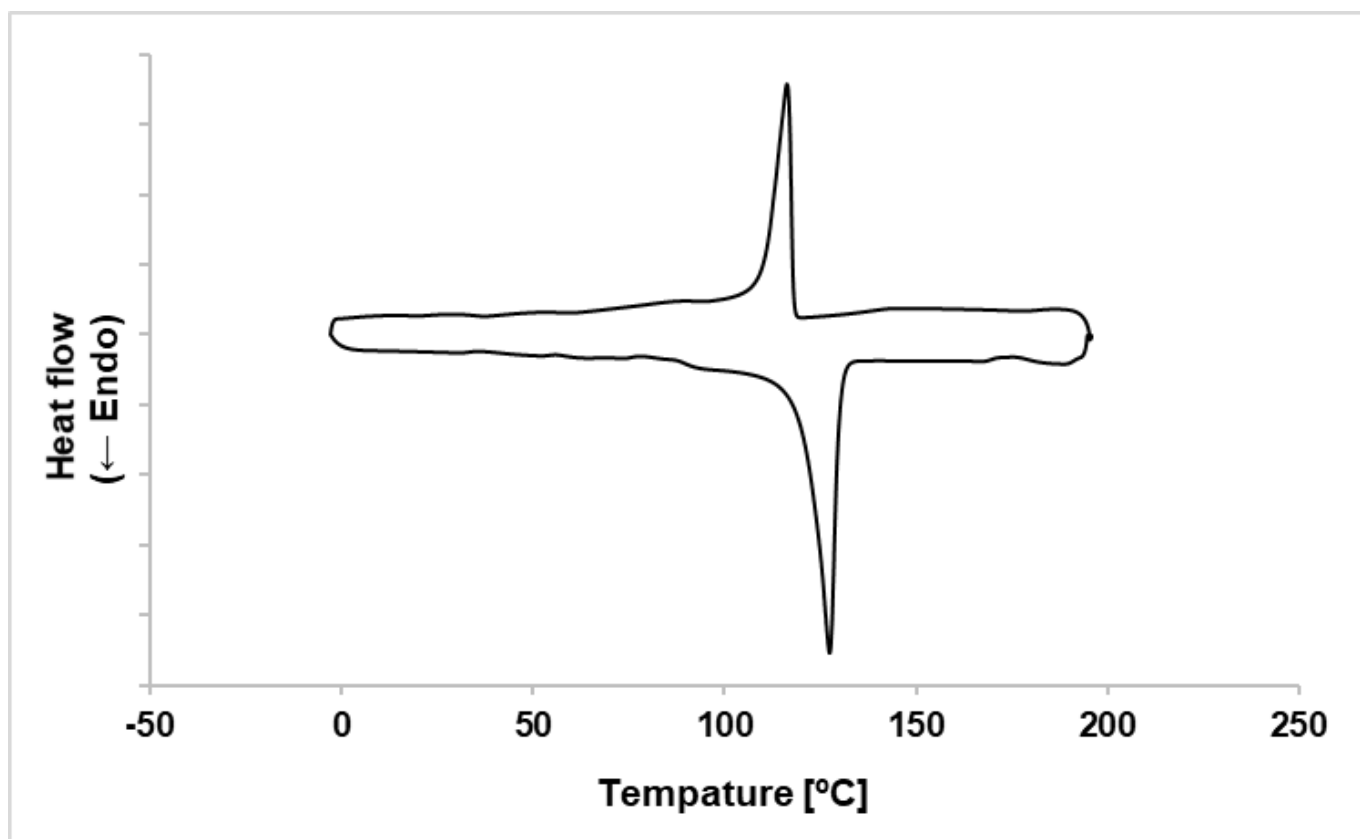

**Figure S60.** DSC trace of the ethylene / allyl acetate copolymer obtained in Table 3, entry 3.

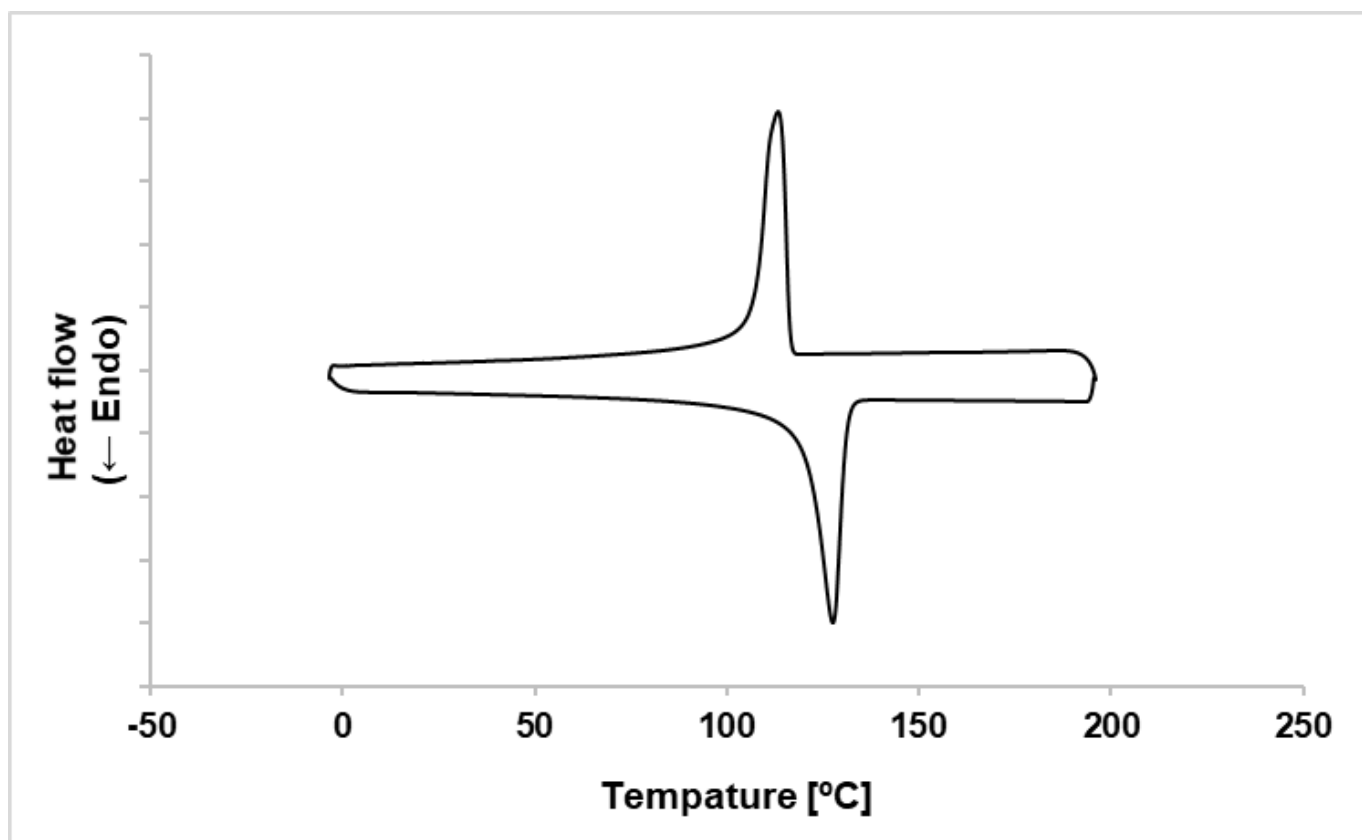

**Figure S61.** DSC trace of the ethylene / allyl acetate copolymer obtained in Table 3, entry 4.

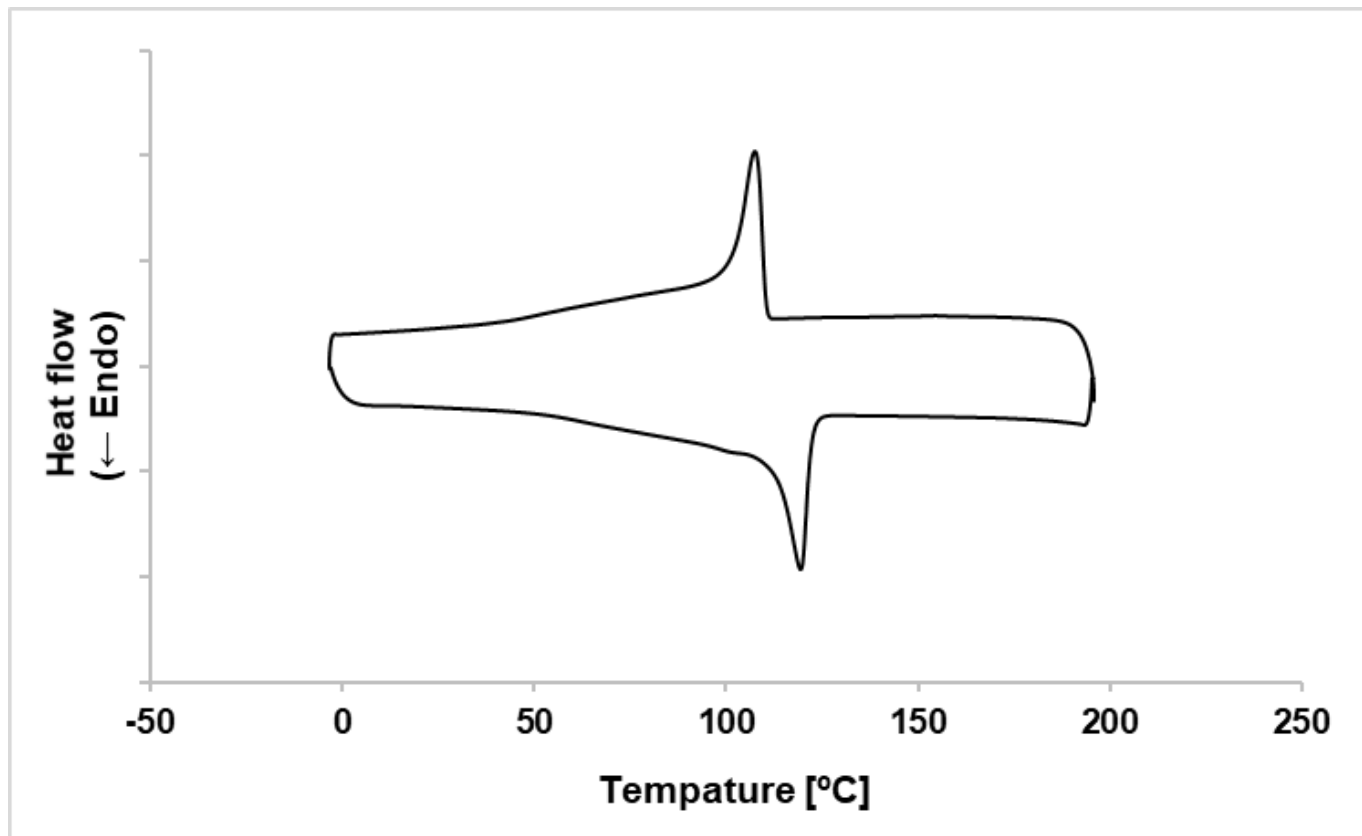

**Figure S62.** DSC trace of the ethylene / allyl acetate copolymer obtained in Table 3, entry 5.

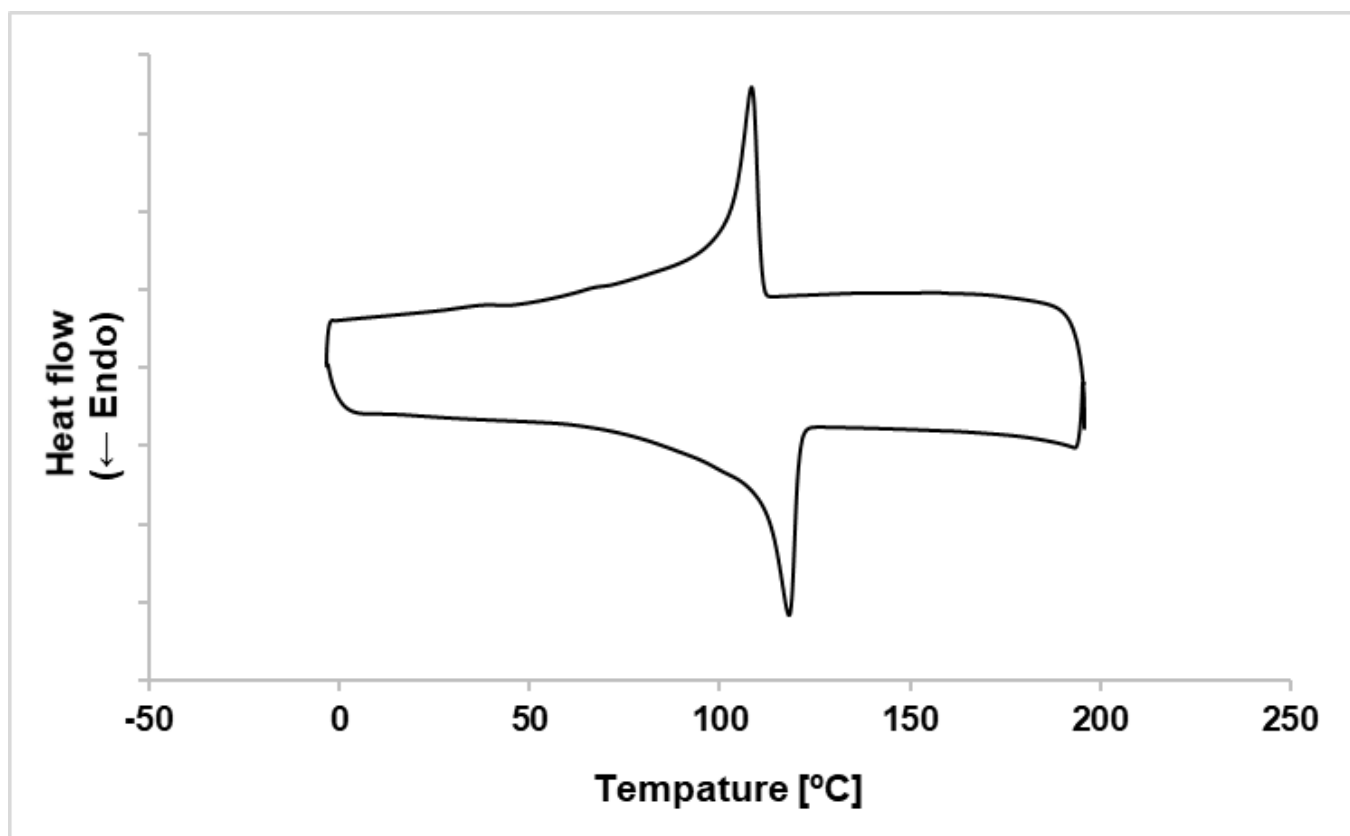

**Figure S63.** DSC trace of the ethylene / allyl acetate copolymer obtained in Table 3, entry 6.

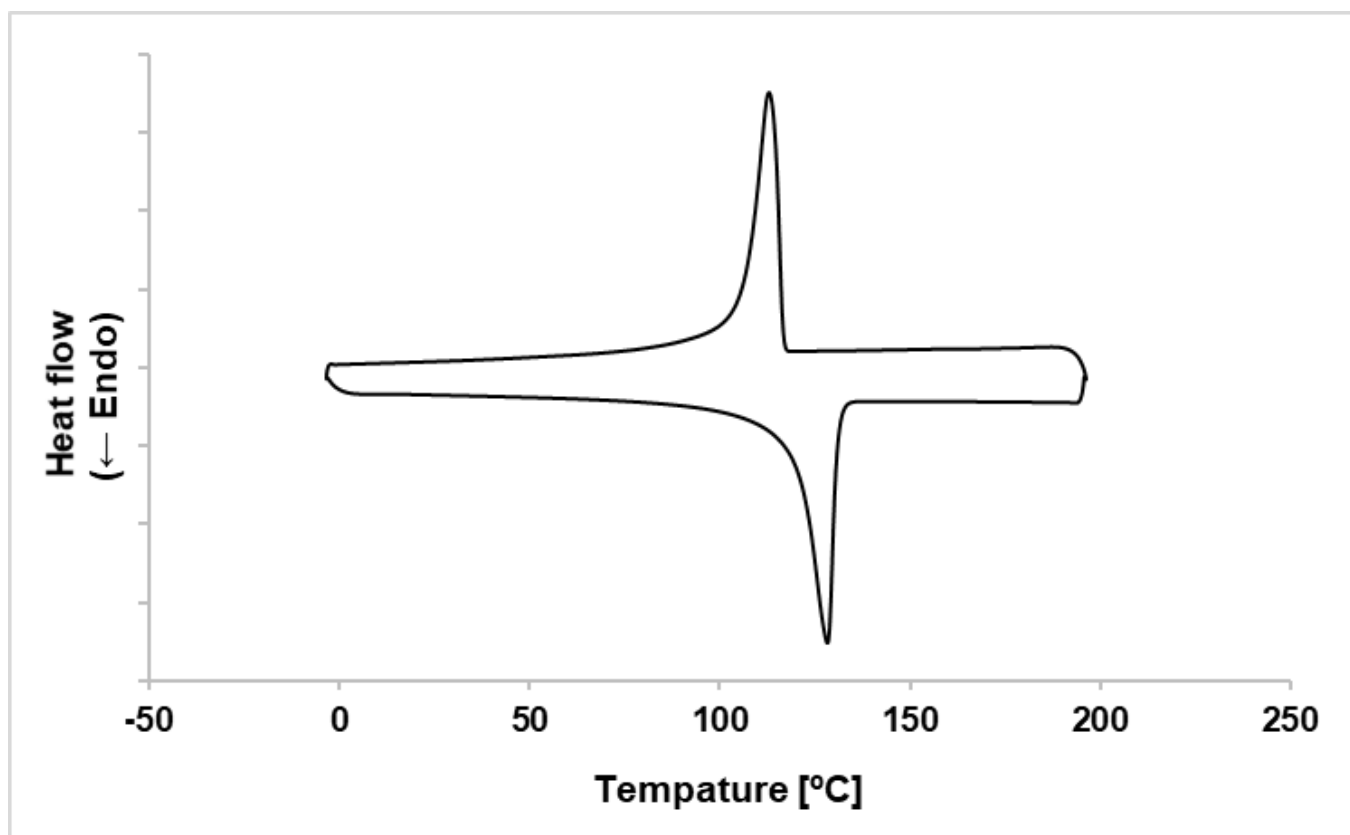

**Figure S64.** DSC trace of the polyethylene obtained in Table 3, entry 7.



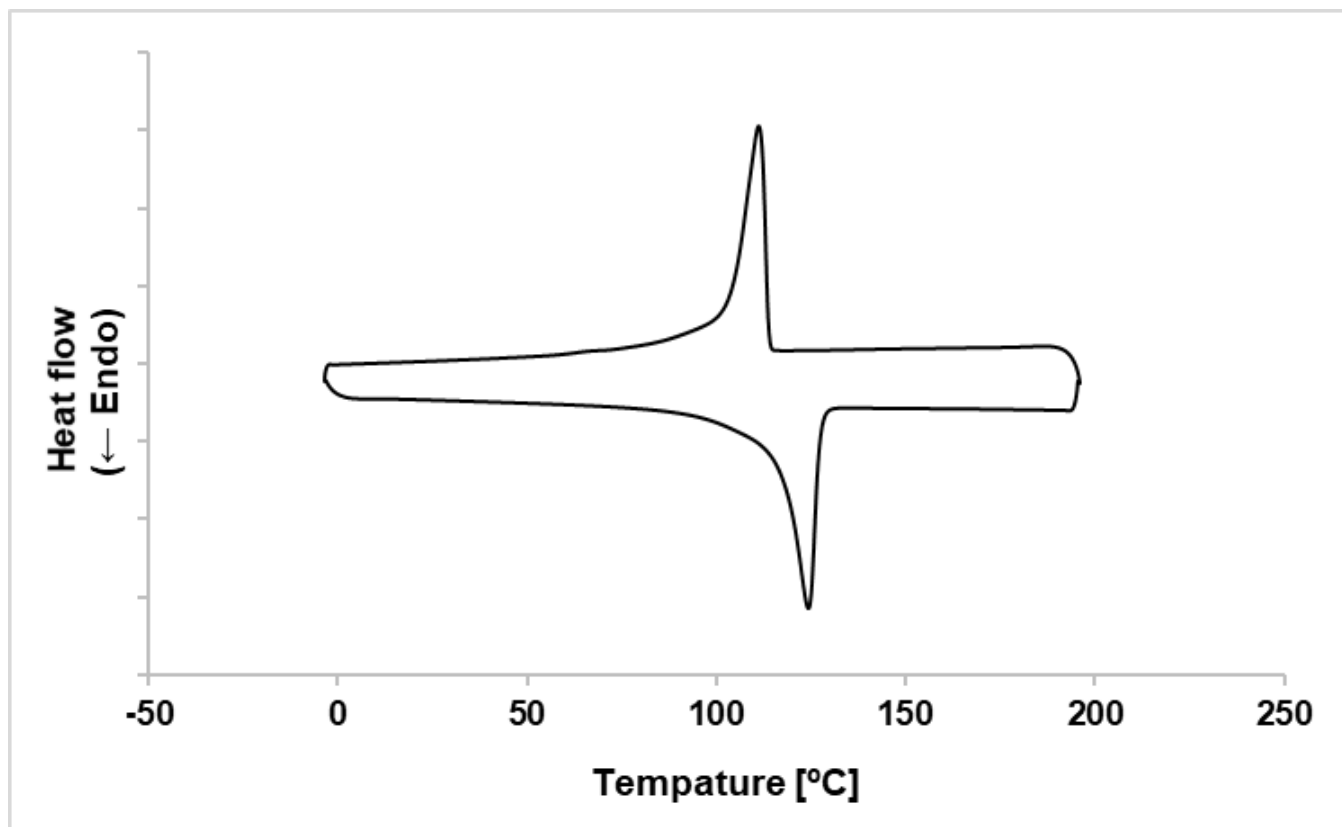

**Figure S65.** DSC trace of the polyethylene end-capped with ester obtained in Table 3, entry 8.

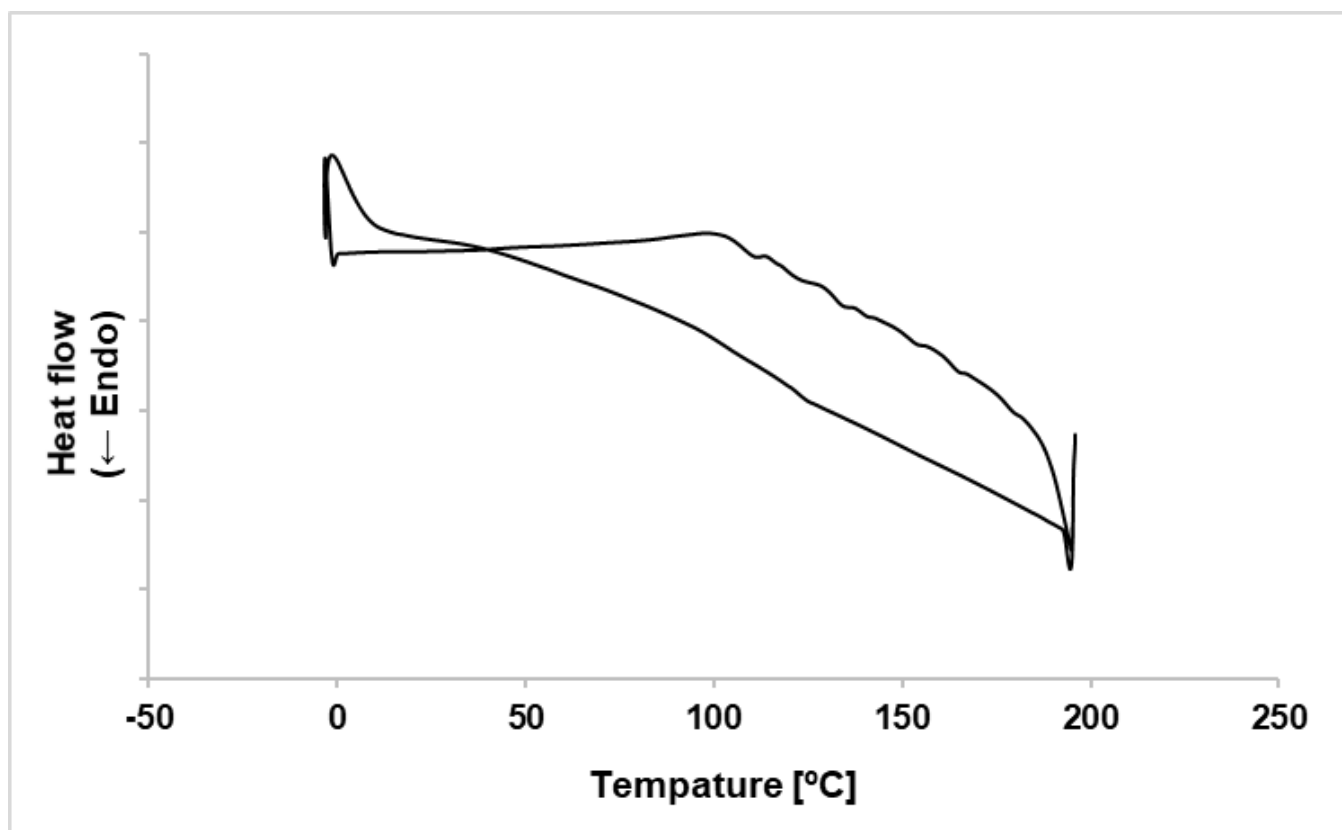

**Figure S66.** DSC trace of the propylene / allyl acetate copolymer obtained in Table 3, entry 9.

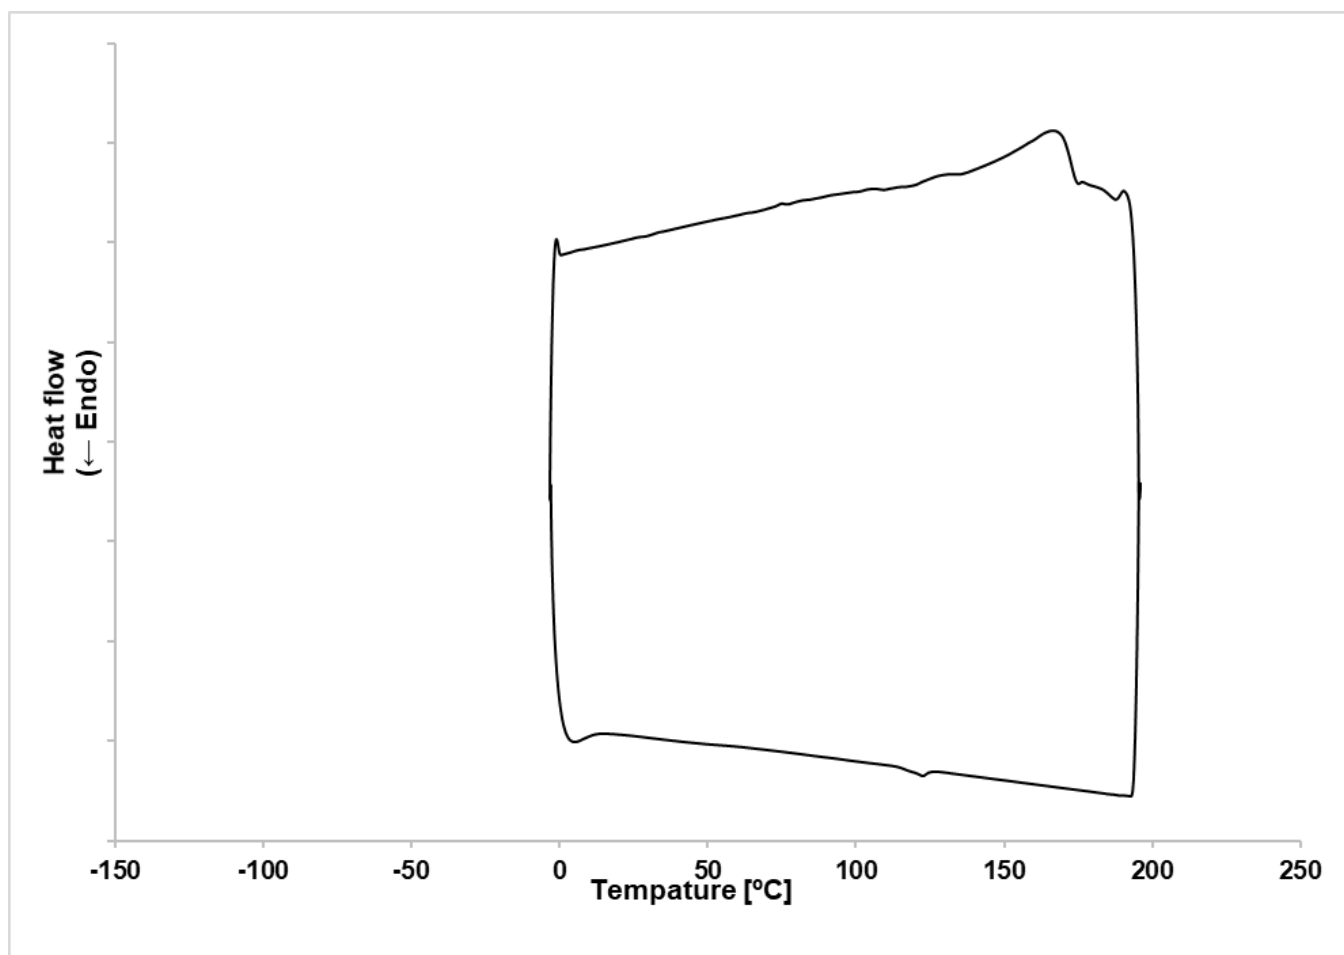

**Figure S67.** DSC trace of the propylene / allyl acetate copolymer obtained in Table 3, entry 10.

## 5. X-ray Crystallographic Data of Complex 3

Single crystal of **3** was mounted with mineral oil on a loop-type mount and transferred to the goniometer of a Rigaku Saturn CCD diffractometer. The radiation was performed with graphite-monochromated Mo K $\alpha$  ( $\lambda = 0.71075$  Å). The structure was solved by direct methods with (SHELXT 2018)<sup>10</sup> and refined by full-matrix least-squares techniques against  $F^2$  (SHELXL 2018)<sup>10</sup> on the Olex<sup>2</sup> program.<sup>11</sup> The intensities was corrected for Lorentz and polarization effects. The non-hydrogen atoms were refined anisotropically. Hydrogen atoms were placed using AFIX instructions. The data are summarized in Table S1.

**Table S1.** Crystal Data and Structure Refinement for Complex **3**.

|                                            |                 |                                                                    |
|--------------------------------------------|-----------------|--------------------------------------------------------------------|
| Empirical formula                          |                 | C <sub>52</sub> H <sub>55</sub> BF <sub>24</sub> NiOP <sub>2</sub> |
| Formula weight                             |                 | 1283.42                                                            |
| Temperature (K)                            |                 | 293                                                                |
| Crystal system                             |                 | triclinic                                                          |
| Space group                                |                 | $P_{-1}$                                                           |
| Unit cell dimensions                       | a (Å)           | 12.36430(10)                                                       |
|                                            | b (Å)           | 21.2593(2)                                                         |
|                                            | c (Å)           | 25.0961(3)                                                         |
|                                            | $\alpha$ (°)    | 65.7360(10)                                                        |
|                                            | $\beta$ (°)     | 76.1750(10)                                                        |
|                                            | $\gamma$ (°)    | 76.5800(10)                                                        |
| Volume (Å <sup>3</sup> )                   |                 | 5772.53(11)                                                        |
| Z                                          |                 | 2                                                                  |
| Density (calculated) (g/cm <sup>3</sup> )  |                 | 1.528                                                              |
| Absorption coefficient (mm <sup>-1</sup> ) |                 | 0.50                                                               |
| F(000)                                     |                 | 2714.0                                                             |
| Crystal size (mm <sup>3</sup> )            |                 | 0.50 × 0.25 × 0.40                                                 |
| Theta range                                |                 | 2.2960–28.9450                                                     |
| Index ranges                               | -16 ≤ h ≤ 16    |                                                                    |
|                                            | -28 ≤ k ≤ 28    |                                                                    |
|                                            | -34 ≤ l ≤ 34    |                                                                    |
| Reflections collected                      |                 | 202560                                                             |
| Independent reflections                    |                 | 28130                                                              |
| R(int)                                     |                 | 0.0299                                                             |
| Data / restraints / parameters             |                 | 28130 / 0 / 1484                                                   |
| Goodness-of-fit on $F^2$                   |                 | 1.032                                                              |
| Final R indices [I > 2 $\sigma$ (I)]       | $R_1 = 0.0953$  |                                                                    |
|                                            | $wR_2 = 0.2809$ |                                                                    |
| R indices (all data) [I > 2 $\sigma$ (I)]  | $R_1 = 0.1054$  |                                                                    |
|                                            | $wR_2 = 0.2919$ |                                                                    |

## 5. References

- (1) Mitsushige, Y.; Yasuda, H.; Carrow, B. P.; Ito, S.; Kobayashi, M.; Tayano, T.; Watanabe, Y.; Okuno, Y.; Hayashi, S.; Kuroda, J.; Okumura, Y.; Nozaki, K. Methylene-Bridged Bisphosphine Monoxide Ligands for Palladium-Catalyzed Copolymerization of Ethylene and Polar Monomers. *ACS Macro Lett.* **2018**, *7*, 305.
- (2) Chen, M.; Chen, C. L. A Versatile Ligand Platform for Palladium- and Nickel-Catalyzed Ethylene Copolymerization with Polar Monomers. *Angew. Chem. Int. Ed.* **2018**, *57*, 3094.
- (3) Tao, W. J.; Nakano, R.; Ito, S.; Nozaki, K. Copolymerization of Ethylene and Polar Monomers by Using Ni/IzQO Catalysts. *Angew. Chem. Int. Ed.* **2016**, *55*, 2835.
- (4) Nakano, R.; Nozaki, K. Copolymerization of Propylene and Polar Monomers Using Pd/IzQO Catalysts. *J. Am. Chem. Soc.* **2015**, *137*, 10934.
- (5) Ota, Y.; Ito, S.; Kobayashi, M.; Kitade, S.; Sakata, K.; Tayano, T.; Nozaki, K. Crystalline Isotactic Polar Polypropylene from the Palladium-Catalyzed Copolymerization of Propylene and Polar Monomers. *Angew. Chem. Int. Ed.* **2016**, *55*, 7505.
- (6) Yang, Y. C.; Leung, D. Y. C.; Toy, P. H. Rasta Resin-TBD as a Reusable Catalyst for Transesterification Reactions. *Synlett* **2013**, *24*, 1870.
- (7) Ito, S.; Munakata, K.; Nakamura, A.; Nozaki, K. Copolymerization of Vinyl Acetate with Ethylene by Palladium/Alkylphosphine–Sulfonate Catalysts. *J. Am. Chem. Soc.* **2009**, *131*, 14606.
- (8) Guironnet, D.; Roesle, P.; Rünzi, T.; Göttker-Schnetmann, I.; Mecking, S. Insertion Polymerization of Acrylate. *J. Am. Chem. Soc.* **2009**, *131*, 422.
- (9) Tao, W.; Akita, S.; Nakano, R.; Ito, S.; Hoshimoto, Y.; Ogoshi, S.; Nozaki, K. Copolymerisation of ethylene with polar monomers by using palladium catalysts bearing an N-heterocyclic carbene–phosphine oxide bidentate ligand. *Chem. Commun.* **2017**, *53*, 2630.
- (10) Sheldrick, G. M. Crystal structure refinement with *SHELXL*. *Acta Crystallogr C* **2015**, *71*, 3.
- (11) Dolomanov, O. V.; Bourhis, L. J.; Gildea, R. J.; Howard, J. A. K.; Puschmann, H. *OLEX2*: a complete structure solution, refinement and analysis program. *J Appl Crystallogr* **2009**, *42*, 339.
